# Supplementary material for: N -Glycosylation with sulfoxide donors for the synthesis of peptidonucleosides
Source: Royal Society of Chemistry journal article supplement (doi:10.1039/d1ob00493j), 2021-01-01

# N-glycosylation of sulfoxides donors for the synthesis of peptidonucleosides

Margaux Beretta, Emilie Rouchaud, Lionel Nicolas, Jean-Pierre Vors, Thomas Dröge, Mazen Es-Sayed, Jean-Marie Beau,\* and Stéphanie Norsikian \*

## Supplementary Information

|                                                         |    |
|---------------------------------------------------------|----|
| EXPERIMENTAL PROCEDURES.....                            | 1  |
| <sup>1</sup> H-NMR AND <sup>13</sup> C-NMR SPECTRA..... | 12 |

## Experimental procedures

### General

All non-aqueous reactions were run under an inert atmosphere (argon), by using standard techniques for manipulating air-sensitive compounds and the glassware was stored in the oven prior to use. All reagents and solvents were commercially available and were used without further purification. Molecular sieves 4 Å were used as a powder and were activated overnight at 250 °C and under reduced pressure, in a Kugelrohr apparatus or with a micro-wave for 45 seconds. Reactions were monitored with analytical Merck TLC silica gel 60 F254 plates and visualized under UV (254 nm) and stained with KMnO<sub>4</sub> or vanillin. Column chromatography was done with Merck Geduran silical gel Si 60 (40-63 μm) and Redisep Rf columns (silica gel Si 60, 40-63 μm) on an Interchim puriFlash® apparatus and on a Teledyne Isco combiflash Rf. Preparative thin-layer chromatography was performed on silica gel 60 F254 0.5 mm 20×20 cm plates and visualised under UV (254 nm). Deuterated chloroform used for NMR analyses was generally neutralized by addition of anhydrous and granular K<sub>2</sub>CO<sub>3</sub>. NMR spectra were recorded with AM 300, AVANCE 300 and AVANCE 500 Bruker spectrometers. Chemical shifts are given in parts per million, referenced to the solvent peak of CDCl<sub>3</sub>, defined at 77.2 ppm (<sup>13</sup>C NMR) and 7.26 ppm (<sup>1</sup>H NMR) or to the solvent peak of CD<sub>3</sub>OD, defined at 49.9 ppm (<sup>13</sup>C NMR) and 3.34 ppm (<sup>1</sup>H NMR) or to the solvent peak of D<sub>2</sub>O, defined at 4.79 ppm (<sup>1</sup>H NMR) or to the solvent peak of DMSO-d<sub>6</sub>, defined at 39.5 ppm (<sup>13</sup>C NMR) and 2.50 ppm (<sup>1</sup>H NMR). Data are reported as follow: chemical shifts, multiplicity (s = singlet, d = doublet, t = triplet, q = quadruplet, m = multiplet, bs = broad singlet), coupling constant (in Hz) and integration. IR spectra were recorded on a Perkin-Elmer Spectrum BX instrument with an FT-IR system. Optical rotation were measured on an Anton Paar MCP300 polarimeter using a cell of 1-dm-length path. Mass spectra were recorded with Waters Micromass LCT Premier mass spectrometer.

**Methyl 2,3-di-O-acetyl-4,6-O-benzylidene-α-D-galactopyranoside 2a.** According to the procedure of Ferro *et al.*,<sup>1</sup> a suspension of methyl α-D-galactopyranoside (5.0 g, 25.75 mmol, 1.0 eq.), camphor-10-sulfonic acid (119.6 mg, 0.52 mmol, 0.02 eq.) and benzaldehyde dimethyl acetal (5.4 mL, 36.05 mmol, 1.4 eq.) in dry chloroform (400 mL) under argon atmosphere was stirred for 24 h at 80 °C. Solvent was then removed and the residue was diluted in EtOAc (75 mL), neutralized with triethylamine then washed with water (75 mL). Aqueous phase was extracted with EtOAc (10 x 50 mL). The organic layers were combined, dried over Na<sub>2</sub>SO<sub>4</sub>, filtered and concentrated under reduced pressure to afford the pure 4,6-O-benzylidene acetal intermediate (6.52 g, 23.12 mmol, 90%) as a white powder. <sup>1</sup>H-NMR (CDCl<sub>3</sub>, 500 MHz) δ 7.53-7.46 (m, 2H, H<sub>Ar</sub>), 7.41-7.34 (m, 3H, H<sub>Ar</sub>), 5.56 (s, 1H, PhCH), 4.94 (d, 1H, J = 1.0, 3.0 Hz, H1), 4.34-4.25 (m, 2H, H6, H4), 4.09 (dd, 1H, J = 2.0 and 12.6 Hz, Hz, H6a), 3.95-3.87 (m, 2H, H2, H3), 3.73-3.70 (m, 1H, H5), 3.48 (s, 3H, OCH<sub>3</sub>), 2.37 (bs, 1H, OH), 2.11 (bs, 1H, OH).<sup>2</sup> To a stirred

<sup>1</sup> V. Ferro, M. Mocerino, R. V. Stick and D. M. G. Tilbrook, *Austr. J. Chem.*, 1988, **41**, 813.

<sup>2</sup> Experimental data are in agreement with those reported in the literature : A. H. Viuff, L. M. Besenbacher, A. Kamori, M. T. Jensen, M. Kilian, A. Kato and H. H. Jensen, *Org. Biomol. Chem.*, 2015, **13**, 9637.

solution of the 4,6-*O*-benzylidene acetal (2.47 g, 8.76 mmol, 1 eq.) in pyridine (14 mL) was added acetic anhydride (6.62 mL, 70.1 mmol, 8 eq.). The resulting mixture was stirred at room temperature for 12 h. Solvent was then removed and the residue was co-evaporated with toluene (3 x 20 mL). The crude product was purified by flash chromatography on silica gel (Heptane/EtOAc 70:30 to 60:40) to afford product **2a** (3.20 g, 8.74 mmol, quantitative) as a white powder.  $[\alpha]_{\text{D}}^{25} + 202.3$  ( $c = 0.6$ ,  $\text{CHCl}_3$ );  $^1\text{H NMR}$  (300 MHz,  $\text{CDCl}_3$ )  $\delta$  7.53-7.46 (m, 2H,  $H_{\text{Ar}}$ ), 7.41-7.31 (m, 3H,  $H_{\text{Ar}}$ ), 5.50 (s, 1H,  $H7$ ), 5.35 (dd, 1H,  $J_{2,1} = 3.0$  Hz,  $J_{2,3} = 10.5$  Hz,  $H2$ ), 5.30 (dd, 1H,  $J_{3,4} = 2.5$  Hz,  $J_{3,2} = 10.5$  Hz,  $H3$ ), 5.07 (d, 1H,  $J_{1,2} = 3.0$  Hz,  $H1$ ), 4.45 (d, 1H,  $J_{4,3} = 2.5$  Hz,  $H4$ ), 4.27 (dd, 1H,  $J_{6,5} = 1.5$  Hz,  $J_{6,6'} = 12.5$  Hz,  $H6$ ), 4.05 (dd, 1H,  $J_{6',5} = 1.5$  Hz,  $J_{6',6} = 12.5$  Hz,  $H6'$ ), 3.74 (m, 1H,  $H5$ ), 3.40 (s, 3H,  $\text{OCH}_3$ ), 2.07 (s, 3H,  $\text{OCOCH}_3$ ), 2.06 (s, 3H,  $\text{OCOCH}_3$ );  $^{13}\text{C NMR}$  (75 MHz,  $\text{CDCl}_3$ )  $\delta$  170.9 (C=O), 170.4 (C=O), 137.7 ( $\text{C}_{\text{qAr}}$ ), 129.2 ( $\text{CH}_{\text{Ar}}$ ), 128.4 ( $\text{CH}_{\text{Ar}}$ ), 126.4 ( $\text{CH}_{\text{Ar}}$ ), 101.1 (C7), 98.0 (C1), 74.1 (C4), 69.3 (C6), 68.8 (C3), 68.3 (C2), 62.2 (C5), 55.7 ( $\text{OCH}_3$ ), 21.2 ( $\text{OCOCH}_3$ ), 21.1 ( $\text{OCOCH}_3$ ). IR  $\nu$  (film,  $\text{cm}^{-1}$ ) 2914 (=C-H), 2866 ( $\text{CH}_3$ ), 1746 (C=O); ESIHRMS  $m/z = 389.1214$   $[\text{M}+\text{Na}]^+$ .  $\text{C}_{18}\text{H}_{22}\text{O}_8\text{Na}$  requires 389.1212.

**Methyl 2,3-di-*O*-acetyl-6-*O*-benzyl- $\alpha$ -D-galactopyranoside 3a.** A solution of **2a** (2.72 g, 7.4 mmol, 1 eq.) and 4Å molecular sieves (5 g) in dry  $\text{CH}_2\text{Cl}_2$  (50 mL) was stirred for 1 h at room temperature under argon atmosphere. The mixture was cooled to  $-78$  °C and  $\text{Et}_3\text{SiH}$  (1.18 mL, 7.4 mmol, 1 eq.) and TfOH (330  $\mu\text{L}$ , 3.7 mmol, 0.5 eq.) were added successively. After being stirred for 15 min at  $-78$  °C,  $\text{Et}_3\text{SiH}$  (1eq.) and TfOH (0.5 eq) were added again. After 15 min on same conditions, new additions of  $\text{Et}_3\text{SiH}$  (0.5 eq.) and TfOH (0.5 eq.) were done. Finally, after again 15 min, a final addition of TfOH (0.5 eq.) was realized. The resulting mixture was stirred at  $-78$  °C for 30 min then diluted with  $\text{CHCl}_3$  (20 mL) and poured in saturated aqueous solution of sodium bicarbonate (40 mL). The organic layer was extract with  $\text{CHCl}_3$  (3 x 25 mL), dried over  $\text{Na}_2\text{SO}_4$ , filtered and concentrated under vacuum. The crude mixture was directly dissolved in MeCN (25 mL) and treated with a diluted aqueous solution of  $\text{HBF}_4$  (0.25 M, 25 mL). The resulting solution was stirred at room temperature for 1h30 and then quenched with saturated solution of  $\text{NaHCO}_3$  until neutralization. Aqueous layer was extracted with EtOAc (3 x 15 mL). Organic layers were dried over  $\text{Na}_2\text{SO}_4$ , filtered and concentrated under vacuum. The crude product was purified by flash chromatography on silica gel (Heptane/EtOAc 90:10 to 60:40) to afford the clean product **3a** (1.52 g, 4.1 mmol, 63%) as a colorless oil.  $[\alpha]_{\text{D}}^{25} + 119.6$  ( $c = 0.9$ ,  $\text{CHCl}_3$ );  $^1\text{H NMR}$  (300 MHz,  $\text{CDCl}_3$ )  $\delta$  7.36-7.26 (m, 5H,  $H_{\text{Ar}}$ ), 5.30 (dd, 1H,  $J_{2,1} = 3.0$  Hz,  $J_{2,3} = 10.5$  Hz,  $H2$ ), 5.24 (dd, 1H,  $J_{3,4} = 2.5$  Hz,  $J_{3,2} = 10.5$  Hz,  $H3$ ), 5.00 (d, 1H,  $J_{1,2} = 3.0$  Hz,  $H1$ ), 4.60 (d, 1H,  $J_{\text{H,H}} = 12.0$  Hz,  $\text{CH}_2\text{Ph}$ ) 4.54 (d, 1H,  $J_{\text{H,H}} = 12.0$  Hz,  $\text{CH}_2\text{Ph}$ ), 4.24 (m, 1H,  $H4$ ), 3.97 (t, 1H,  $J_{5,4} = J_{5,6} = 4.5$  Hz,  $H5$ ), 3.78 (dd, 1H,  $J_{6,5} = 4.5$  Hz,  $J_{6,6'} = 10.0$  Hz,  $H6$ ), 3.73 (dd, 1H,  $J_{6',5} = 4.5$  Hz,  $J_{6',6} = 10.0$  Hz,  $H6'$ ), 3.38 (s, 3H,  $\text{OCH}_3$ ), 3.01 (bs, 1H,  $\text{OH}$ ), 2.08 (s, 3H,  $\text{OCOCH}_3$ ), 2.06 (s, 3H,  $\text{OCOCH}_3$ );  $^{13}\text{C NMR}$  (75 MHz,  $\text{CDCl}_3$ )  $\delta$  170.6 (C=O), 170.3 (C=O), 137.5 ( $\text{C}_{\text{qAr}}$ ), 128.7 ( $\text{CH}_{\text{Ar}}$ ), 128.1 ( $\text{CH}_{\text{Ar}}$ ), 127.9 ( $\text{CH}_{\text{Ar}}$ ), 97.6 (C1), 74.1 ( $\text{CH}_2\text{Ph}$ ), 70.4 (C2), 70.4 (C6), 69.4 (C4), 68.5 (C3), 68.1 (C5), 55.6 ( $\text{OCH}_3$ ), 21.2 ( $\text{OCOCH}_3$ ), 21.1 ( $\text{OCOCH}_3$ ); IR  $\nu$  (film,  $\text{cm}^{-1}$ ) 3466 (O-H), 2934 (=C-H), 1738 (C=O); ESIHRMS  $m/z = 391.1369$   $[\text{M}+\text{Na}]^+$ .  $\text{C}_{18}\text{H}_{24}\text{O}_8\text{Na}$  requires 391.1369.

**Methyl 2,3-di-*O*-acetyl-4-azido-6-*O*-benzyl- $\alpha$ -D-glucopyranoside 4a.** Galactopyranose **3a** (77 mg, 0.209 mmol, 1 eq.) was co-evaporated 2 times with toluene (5 mL) and then diluted in dry  $\text{CH}_2\text{Cl}_2$  ( $C = 0.1$  M, 2 mL) under argon atmosphere. Pyridine (0.18 mL, 2.29 mmol, 11 eq.) was added and the mixture was cooled to 0 °C. Triflic anhydride (70  $\mu\text{L}$ , 0.418 mmol, 2 eq.) was added and the mixture stirred for 90 min at 0 °C. The mixture was quenched by addition of 10% aqueous  $\text{NaHCO}_3$  solution (20 mL), the phases were separated and the organic layer was extracted with 3% hydrochloric acid (3 x 10 mL), with water (10 mL), dried over  $\text{Na}_2\text{SO}_4$  and was concentrated under vacuum. The resulting crude product was co-evaporated with toluene (3 x) to remove all traces of pyridine and dried for 1 h under vacuum. The yellow residue was dissolved in dry DMF (2.4 mL), sodium azide (332 mg, 5.12 mmol, 12 eq.) was added, and the reaction mixture was stirred overnight. The mixture was diluted with water and EtOAc (15 mL) and the phases were separated. The organic phase was washed with brine (3 x 15 mL), dried over  $\text{Na}_2\text{SO}_4$  and concentrated under vacuum. The residue was purified by flash chromatography on silica gel (Heptane/EtOAc 90:10 to 80:20) to afford **4a** (69 mg, 0.175 mmol, 84%) as a colorless oil.  $[\alpha]_{\text{D}}^{25} + 136.2$  ( $c = 0.6$ ,  $\text{CHCl}_3$ );  $^1\text{H NMR}$  (300 MHz,  $\text{CDCl}_3$ )  $\delta$  7.39-7.26 (m, 5H,  $H_{\text{Ar}}$ ), 5.41 (t, 1H,  $J_{3,2} = 10.0$  Hz,  $H3$ ), 4.91 (d, 1H,  $J_{1,2} = 4.0$  Hz,  $H1$ ), 4.85 (dd, 1H,  $J_{2,1} = 4.0$  Hz,  $J_{2,3} = 10.0$  Hz,  $H2$ ), 4.65 (d, 1H,  $J_{\text{H,H}} = 12.0$  Hz,  $\text{CH}_2\text{Ph}$ ) 4.54 (d, 1H,  $J_{\text{H,H}} = 12.0$  Hz,  $\text{CH}_2\text{Ph}$ ), 3.79 (t, 1H,  $J_{4,3} = J_{4,5} = 10.0$  Hz,  $H4$ ), 3.74-3.41 (m, 3H,  $H5$ ,  $H6$ ,  $H6'$ ), 3.36 (s, 3H,  $\text{OCH}_3$ ), 2.08 (s, 3H,  $\text{OCOCH}_3$ ), 2.05 (s, 3H,  $\text{OCOCH}_3$ );  $^{13}\text{C NMR}$  (75 MHz,  $\text{CDCl}_3$ )  $\delta$  170.5 (C=O), 170.0 (C=O), 137.8 ( $\text{C}_{\text{qAr}}$ ), 128.7 ( $\text{CH}_{\text{Ar}}$ ), 128.0 ( $\text{CH}_{\text{Ar}}$ ), 128.0 ( $\text{CH}_{\text{Ar}}$ ), 97.3 (C1), 73.8 ( $\text{CH}_2\text{Ph}$ ), 71.2 (C2), 70.9 (C3), 69.3 (C5), 68.5 (C6), 60.2 (C4), 55.6 ( $\text{O-CH}_3$ ), 21.0 ( $\text{OCOCH}_3$ ), 21.0 ( $\text{OCOCH}_3$ ); IR  $\nu$  (film,  $\text{cm}^{-1}$ ) 2935 ( $\text{CH}_2$ ), 2106 ( $\text{N}_3$ ), 1746 (C=O); ESIHRMS  $m/z = 457.1712$   $[\text{M}+\text{CH}_3\text{CN}+\text{Na}]^+$ .  $\text{C}_{20}\text{H}_{26}\text{N}_4\text{O}_7\text{Na}$  requires 457.1699.

**1,2,3,6-Tetra-*O*-acetyl-4-azido- $\alpha$ -D-glucopyranose 5.** To a stirred solution of **4a** (57 mg, 0.16 mmol, 1 eq.) in acetic anhydride (0.5 mL) was added dropwise at 0 °C  $\text{H}_2\text{SO}_4$  (10  $\mu\text{L}$ ). The resulting mixture was stirred overnight at room temperature and then diluted by cold water. After being stirred for 1 h, the phases were separated and the

aqueous phase was extracted with EtOAc (3 x 2 mL). Organic layers were combined, neutralized with aqueous NaHCO<sub>3</sub> (4 mL), then washed with brine (2 x 3 mL), dried over Na<sub>2</sub>SO<sub>4</sub> and evaporated under vacuum. The residue was then purified by flash chromatography on silica gel (Heptane/EtOAc 70:30 to 60:40) to afford clean product **5** ( $\alpha/\beta$  8:2) (43 mg, 0.12 mmol, 73%) as a colorless oil. For the major  $\alpha$  anomer: <sup>1</sup>H NMR (CDCl<sub>3</sub>, 300 MHz)  $\delta$  6.31 (d,  $J$  = 3.5 Hz, 1H, *H1*), 5.49 (t,  $J$  = 10.0 Hz, 1H, *H4*), 5.07 (dd,  $J$  = 10.5 and 3.5 Hz, 1H, *H2*), 4.37 (dd,  $J$  = 12.0 and 4.5 Hz, 1H, *H6*), 4.29 (dd,  $J$  = 12.0 and 4.0 Hz, 1H, *H6*), 3.95-3.85 (m, *H5*), 3.71 (t,  $J$  = 10.5 Hz, 1H, *H3*), 2.19-2.04 (4s, 12H, COCH<sub>3</sub>).<sup>3</sup>

**2,3,6-Tri-*O*-acetyl-4-azido-D-glucopyranose 5-OH**. To a stirred solution of **5** (1 eq., 50 mg, 0.13 mmol) in THF (1.3 mL) was added benzylamine (1.5 eq., 22  $\mu$ L, 0.20 mmol) and the resulting mixture was stirred at room temperature for 14 h under inert atmosphere. After addition of 1 N HCl (0.1 mL), the reaction mixture was stirred for one more hour. The reaction mixture was diluted with 1 N HCl (6 mL) and extracted with CH<sub>2</sub>Cl<sub>2</sub> (3 x 8 mL). The combined extracts were dried over anhydrous Na<sub>2</sub>SO<sub>4</sub> and concentrated under reduce pressure. The residue was purified by flash chromatography on silica gel (Heptane/EtOAc 70:30 to 40:60) to give the corresponding hemiacetal **5-OH** (28 mg, 0.085 mmol, 63%,  $\alpha/\beta$  = 70:30) as a colorless oil. <sup>1</sup>H NMR (300 MHz, CDCl<sub>3</sub>)  $\delta$  5.51 (t, 0.7H,  $J_{3,2}$  =  $J_{3,4}$  = 10.0 Hz, *H3* $\alpha$ ), 5.38 (bs, 0.7H, *H1* $\alpha$ ), 5.19 (t, 0.3H,  $J_{3,2}$  =  $J_{3,4}$  = 9.5 Hz, *H3* $\beta$ ), 4.82 (dd, 0.7H,  $J_{2,3}$  = 10.0 Hz,  $J_{2,1}$  = 3.5 Hz, *H2* $\alpha$ ), 4.80 (dd, 0.3H,  $J_{2,3}$  = 9.5 Hz,  $J_{2,1}$  = 8.0 Hz, *H2* $\beta$ ), 4.70 (t, 0.3H,  $J_{1,2}$  = 7.0 Hz, *H1* $\beta$ ), 4.39 (dd, 0.3H,  $J_{6,6'}$  = 12.0 Hz,  $J_{6,5}$  = 2.5 Hz, *H6* $\beta$ ), 4.37 (dd, 0.7H,  $J_{6,6'}$  = 12.0 Hz,  $J_{6,5}$  = 2.5 Hz, *H6* $\alpha$ ), 4.22 (dd, 1H,  $J_{6,6'}$  = 12.0 Hz,  $J_{6,5}$  = 4.0 Hz, *H6'* $\beta$ , *H6'* $\alpha$ ), 4.02 (ddd, 0.7H,  $J_{5,4}$  = 10.0 Hz,  $J_{5,6'}$  = 4.0 Hz,  $J_{5,6}$  = 2.5 Hz, *H5* $\alpha$ ), 3.63 (t, 0.3H,  $J_{4,3}$  =  $J_{4,5}$  = 10 Hz, *H4* $\beta$ ), 3.58 (t, 0.7H,  $J_{4,3}$  =  $J_{4,5}$  = 10.0 Hz, *H4* $\alpha$ ), 3.48 (ddd, 0.3H,  $J_{5,4}$  = 10.0 Hz,  $J_{5,6'}$  = 4.0 Hz,  $J_{5,6}$  = 2.5 Hz, *H5* $\beta$ ), 2.10 (s, 3H, OCOCH<sub>3</sub>), 2.09 (s, 3H, OCOCH<sub>3</sub>), 2.06 (s, 3H, OCOCH<sub>3</sub>); <sup>13</sup>C NMR (75 MHz, CDCl<sub>3</sub>)  $\delta$  170.9 (C=O), 170.8 (C=O), 170.7 (C=O), 170.4 (C=O), 169.9 (C=O), 95.5 (C1 $\beta$ ), 90.6 (C1 $\alpha$ ), 73.5 (C2 $\beta$ ), 73.2 (C3 $\beta$ ), 72.5 (C5 $\beta$ ), 71.5 (C2 $\alpha$ ), 70.6 (C3 $\alpha$ ), 67.8 (C5 $\alpha$ ), 63.0 (C6 $\beta$ ), 62.8 (C6 $\alpha$ ), 60.4 (C4 $\beta$ ), 60.3 (C4 $\alpha$ ), 21.0 (COCH<sub>3</sub>) 20.9 (COCH<sub>3</sub>), 20.8 (COCH<sub>3</sub>); IR  $\nu$  (film, cm<sup>-1</sup>) 3458 (O-H), 2960 (CH<sub>3</sub>), 2108 (N<sub>3</sub>), 1739 (C=O); ESIHRMS  $m/z$  = 354.0903 [M+Na]<sup>+</sup>. C<sub>12</sub>H<sub>17</sub>N<sub>3</sub>O<sub>8</sub>Na requires 354.0913.

**1-*O*-(ortho-Hexynylbenzoyl)-2,3,4-tri-*O*-acetyl-4-azido-D-glucopyranose 6**. To a stirred solution of **5-OH** (1 eq., 28 mg, 0.08 mmol) and *ortho*-(hex-1-yn-1-yl)benzoic acid (1.2 eq., 20 mg, 0.10 mmol), in CH<sub>2</sub>Cl<sub>2</sub> (0.3 mL) were added DCC (1.5 eq., 26 mg, 0.13 mmol) and DMAP (1.5 eq., 15 mg, 0.13 mmol) under inert atmosphere. After being stirred for 3 h at room temperature, the reaction mixture was diluted with CH<sub>2</sub>Cl<sub>2</sub> (1 mL) and washed with saturated aqueous NaHCO<sub>3</sub> (1 mL) and brine (1 mL). The organic layer was dried over anhydrous Na<sub>2</sub>SO<sub>4</sub> and then concentrated under reduced pressure. The residue was purified by flash chromatography on silica gel (Heptane/EtOAc 90:10 to 70:30) to provide **6** (36 mg, 84%;  $\alpha/\beta$  = 3:6) as a white solid. <sup>1</sup>H NMR (300 MHz, CDCl<sub>3</sub>)  $\delta$  7.93-7.79 (m, 1H, *H*<sub>Ar</sub> $\alpha$ , *H*<sub>Ar</sub> $\beta$ ), 7.53-7.21 (m, 3H, *H*<sub>Ar</sub> $\alpha$ , *H*<sub>Ar</sub> $\beta$ ), 6.51 (d, 0.4H,  $J_{1,2}$  = 3.5 Hz, *H1* $\alpha$ ), 5.86 (d, 0.6H,  $J_{1,2}$  = 8.0 Hz, *H1* $\beta$ ), 5.55 (t, 0.4H,  $J_{3,2}$  =  $J_{3,4}$  = 10.0 Hz, *H3* $\alpha$ ), 5.23 (t, 0.6H,  $J_{3,2}$  =  $J_{3,4}$  = 9.0 Hz, *H3* $\beta$ ), 5.16 (dd, 0.6H,  $J_{2,1}$  = 8.0 Hz,  $J_{2,3}$  = 9.0 Hz, *H2* $\beta$ ), 5.09 (dd, 0.4H,  $J_{2,1}$  = 3.5 Hz,  $J_{2,3}$  = 10.0 Hz, *H2* $\alpha$ ), 4.37-4.20 (m, 2H, *H6* $\alpha$ , *H6'* $\alpha$ , *H6* $\beta$ , *H6'* $\beta$ ), 4.03-3.94 (m, 0.4H, *H5* $\alpha$ ), 3.72 (t, 0.6H,  $J_{4,3}$  =  $J_{4,5}$  = 9.0 Hz, *H4* $\beta$ ), 3.69 (t, 0.4H,  $J_{4,3}$  =  $J_{4,5}$  = 10.0 Hz, *H4* $\alpha$ ), 3.65-3.58 (m, 0.6H, *H5* $\beta$ ), 2.50-2.36 (m, 2H, *H7*), 2.07 (s, 3H, COCH<sub>3</sub>), 2.04 (s, 3H, COCH<sub>3</sub>), 1.93 (s, 1.2H, COCH<sub>3</sub> $\alpha$ ), 1.92 (s, 1.8H, COCH<sub>3</sub> $\beta$ ), 1.64-1.49 (m, 2H, *H8*), 1.49-1.34 (m, 2H, *H9*), 0.88 (t, 3H,  $J_{CH_3,9}$  = 7.0 Hz, CH<sub>3</sub>); <sup>13</sup>C NMR (75 MHz, CDCl<sub>3</sub>)  $\delta$  170.7 (C=O), 170.2 (C=O), 170.0 (C=O), 169.9 (C=O), 164.2 (Cq), 163.3 (Cq), 135.4 (CH<sub>Ar</sub>), 135.0 (CH<sub>Ar</sub>), 132.8 (CH<sub>Ar</sub>), 132.7 (CH<sub>Ar</sub>), 130.9 (CH<sub>Ar</sub>), 129.8 (Cq<sub>Ar</sub>), 129.2 (Cq<sub>Ar</sub>), 127.6 (CH<sub>Ar</sub>), 127.4 (CH<sub>Ar</sub>), 126.1 (Cq<sub>Ar</sub>), 125.5 (Cq<sub>Ar</sub>), 97.7 (Cq<sub>alkyne</sub>), 97.5 (Cq<sub>alkyne</sub>), 92.1 (C1 $\beta$ ), 90.1 (C1 $\alpha$ ), 79.8 (Cq<sub>alkyne</sub>), 79.1 (Cq<sub>alkyne</sub>), 73.7 (C3 $\beta$ ), 73.1 (C5 $\beta$ ), 70.8 (C3 $\alpha$ ), 70.6 (C2 $\beta$ , C5 $\alpha$ ), 69.7 (C2 $\alpha$ ), 62.7 (C6 $\beta$ ), 62.5 (C6 $\alpha$ ), 60.2 (C4 $\beta$ ), 60.0 (C4 $\alpha$ ), 30.9 (C8 $\beta$ ), 30.8 (C8 $\alpha$ ), 22.3 (C9 $\beta$ , C9 $\alpha$ ), 20.9 (COCH<sub>3</sub>), 20.9 (COCH<sub>3</sub>), 20.8 (COCH<sub>3</sub>), 20.7 (COCH<sub>3</sub>), 20.7 (COCH<sub>3</sub>), 19.8 (C7 $\beta$ ), 19.7 (C7 $\alpha$ ), 13.9 (CH<sub>3</sub> $\beta$ ), 13.8 (CH<sub>3</sub> $\alpha$ ); IR  $\nu$  (film, cm<sup>-1</sup>) 2959 (CH<sub>3</sub>), 2935 (CH<sub>2</sub>), 2229 (alkyne), 2110 (N<sub>3</sub>), 1745 (C=O); ESIHRMS  $m/z$  = 538.1804 [M+Na]<sup>+</sup>. C<sub>25</sub>H<sub>29</sub>N<sub>3</sub>O<sub>9</sub>Na requires 538.1801.

**Phenyl 2,3-di-*O*-acetyl-4,6-*O*-benzylidene-thio- $\beta$ -D-galactopyranoside 2b**. To a stirred solution of Na (52 mg, 20 mol%) in dry MeOH (113 mL) was added phenyl 2,3,4,6-tetra-*O*-acetyl-thio- $\beta$ -D-galactoside (5 g, 11.35 mmol, 1 eq.) under argon atmosphere. The resulting mixture was stirred at room temperature for 2 h and then neutralized with Dowex® H<sup>+</sup>, filtered on celite®, concentrated under reduced pressure and co-evaporated with toluene to afford the deprotected adduct **1b**. This latter (3.03 g, 11.3 mmol, 1 eq.) was then dissolved in dry MeCN (24 mL) then benzaldehyde dimethyl acetal (2.7 mL, 17.8 mmol, 1.6 eq.) and *p*-TsOH (15 mol%, 300 mg) were added. The mixture was stirred at room temperature for 2 h under argon atmosphere and then neutralized with Et<sub>3</sub>N (2 mL).

<sup>3</sup> Experimental data agree with those reported in the literature : Z. Lei, J. Wang, G. Mao, Y. Wen, Y. Tian, H. Wu, Y. Li and H. Xu, *J Agric Food Chem*, 2014, **62**, 6065.

Water (30 mL) and EtOAc (50 mL) were added and the aqueous layer was extracted with EtOAc (2 x 50 mL). Organic layers were dried over Na<sub>2</sub>SO<sub>4</sub>, filtered and concentrated under reduced pressure. The crude product was recrystallized with heptane/EtOAc 70:30 to afford the desired compound (3.3 g, 82%) as a white solid.<sup>4</sup> The obtained product (3.27 g, 11.1 mmol, 1 eq.) was dissolved in pyridine (12 mL). Ac<sub>2</sub>O (6 mL) was added and the mixture was stirred at room temperature overnight. Pyridine was co-evaporated with toluene. The crude product was recrystallized with Heptane/EtOAc 55/45 to afford **2b** (3.61 g, 73%) as a white solid. <sup>1</sup>H NMR (CDCl<sub>3</sub>) δ 7.70–7.19 (m, 10H<sub>Ar</sub>), 5.49 (s, 1H, PhCH), 5.36 (t, *J* = 10.0 Hz, 1H, H<sub>2</sub>), 5.02 (dd, *J* = 10.0 and 3.5 Hz, 1H, H<sub>3</sub>), 4.73 (d, *J* = 10.0 Hz, 1H, H<sub>1</sub>), 4.44–4.36 (m, 2H, H<sub>4</sub> and H<sub>6</sub>), 4.04 (dd, *J* = 12.5 and 1.5 Hz, 1H, H<sub>6</sub>), 3.64–3.60 (m, 1H, H<sub>5</sub>), 2.08, 2.02 (2s, 6H, 2 COCH<sub>3</sub>).<sup>5</sup>

**Phenyl 2,3-di-*O*-acetyl-6-*O*-benzyl-thio-β-D-galactopyranoside 3b.** A solution of **2b** (5.0 g, 11.2 mmol, 1 eq.) in dry MeCN (110 mL) was cooled to 0 °C and Et<sub>3</sub>SiH (10.8 mL, 67.4 mmol, 1 eq.) was added, followed by the addition of Cu(OTf)<sub>2</sub> (200 mg, 0.56 mmol, 0.05 eq.). The resulting mixture was stirred at 0 °C for 1 h and then hydrolysed with a saturated solution of NaHCO<sub>3</sub> (60 mL). The phases were separated and organic layer was dried over Na<sub>2</sub>SO<sub>4</sub>, filtered and concentrated under vacuum. The desired product was obtained in mixture with the silylated one (6.28 g, ratio 30:70). The crude mixture was directly dissolved in MeCN (20 mL) and treated with a diluted aqueous solution of HBF<sub>4</sub> (C = 0.25 M, 20 mL). The resulting solution was stirred at room temperature for 1.5 h and then quenched with saturated solution of NaHCO<sub>3</sub> until neutralization. Aqueous layer was extracted with EtOAc (3 x 15 mL). Organic layers were dried over Na<sub>2</sub>SO<sub>4</sub>, filtered and concentrated under vacuum. The crude product was purified by flash chromatography (Heptane/EtOAc 90:10 to 40:60) to afford product **3b** (4.43 g, 9.93 mmol, 88%) as a colorless oil. <sup>1</sup>H NMR (400 MHz, CDCl<sub>3</sub>) δ 7.54 (dd, *J* = 6.5, 3.0 Hz, 2H), 7.41 – 7.11 (m, 8H), 5.33 (t, *J* = 10.0 Hz, 1H), 4.98 (dd, *J* = 10.0 and 3.0 Hz, 1H), 4.71 (d, *J* = 10.0 Hz, 1H), 4.64 – 4.22 (m, 2H), 4.25 – 4.16 (m, 1H), 3.84 – 3.72 (m, 2H), 2.64 (d, *J* = 4.0 Hz, 1H), 2.10 (s, 6H).<sup>6</sup>

**Phenyl 2,3-di-*O*-acetyl-4-azido-6-*O*-benzyl-thio-β-D-glucopyranoside 4b.** **3b** (500 mg, 1.12 mmol, 1 eq.) was co-evaporated 2 times with toluene (5 mL) and then diluted in dry CH<sub>2</sub>Cl<sub>2</sub> (C = 0.1 M, 11.2 mL) under argon atmosphere. Pyridine (1.0 mL, 12.32 mmol, 11 eq.) was added and the mixture was cooled to 0 °C. Triflic anhydride (280 μL, 1.68 mmol, 2 eq.) was added and the mixture stirred for 90 min at 0 °C. The mixture was quenched by addition of 10% aqueous NaHCO<sub>3</sub> solution (50 mL), the phases were separated and the organic layer was extracted with 3% hydrochloric acid (3 x 20 mL), with water (20 mL), dried over Na<sub>2</sub>SO<sub>4</sub> and was concentrated under vacuum. The resulting crude product was co-evaporated with toluene (3 x) to remove all traces of pyridine and dried for 1 h under vacuum. The yellow residue was dissolved in dry DMF (10 mL), sodium azide (1.6 g, 25.0 mmol, 12 eq.) was added, and the reaction mixture was stirred overnight. The mixture was diluted with water and EtOAc (20 mL) and the phases were separated. The organic phase was washed with brine (3 x 30 mL), dried over Na<sub>2</sub>SO<sub>4</sub> and concentrated under vacuum. The residue was purified by flash chromatography on silica gel (Heptane/EtOAc 90:10 to 80:20) to afford product **4b** (347 mg, 0.736 mmol, 66%) as a colorless oil. [α]<sub>D</sub><sup>25</sup> – 4.4 (c = 1.1, CHCl<sub>3</sub>); <sup>1</sup>H NMR (300 MHz, CDCl<sub>3</sub>) δ 7.42–7.34 (m, 2H, H<sub>Ar</sub>), 7.30–7.09 (m, 8H, H<sub>Ar</sub>), 5.04 (dd, 1H, *J*<sub>3,2</sub> = 9.5 Hz and *J*<sub>3,4</sub> = 10.0 Hz, H<sub>3</sub>), 4.79 (dd, 1H, *J*<sub>2,1</sub> = 10.0 Hz and *J*<sub>2,3</sub> = 9.5 Hz, H<sub>2</sub>), 4.56 (d, 1H, *J*<sub>1,2</sub> = 10.0 Hz, H<sub>1</sub>), 4.52 (d, 1H, *J*<sub>H,H</sub> = 12.0 Hz, CH<sub>2</sub>Ph), 4.45 (d, 1H, *J*<sub>H,H</sub> = 12.0 Hz, CH<sub>2</sub>Ph), 3.69 (dd, 1H, *J*<sub>6,6'</sub> = 11.0 Hz and *J*<sub>6,5</sub> = 2.0 Hz, H<sub>6</sub>), 3.64 (t, 1H, *J*<sub>4,3</sub> = *J*<sub>4,5</sub> = 10.0 Hz, H<sub>4</sub>) 3.62 (dd, 1H, *J*<sub>6',6</sub> = 11.0 Hz, *J*<sub>6',5</sub> = 4.0 Hz, H<sub>6'</sub>), 3.31 (ddd, 1H, *J*<sub>5,4</sub> = 10.0 Hz, *J*<sub>5,6'</sub> = 4.0 Hz and *J*<sub>5,6</sub> = 2.0 Hz, H<sub>5</sub>), 1.96 (s, 6H, CH<sub>3</sub>); <sup>13</sup>C NMR (75 MHz, CDCl<sub>3</sub>) δ 170.2 (C=O), 169.7 (C=O), 138.0 (C<sub>qAr</sub>), 133.3 (CH<sub>Ar</sub>), 132.0 (C<sub>qAr</sub>), 129.2 (CH<sub>Ar</sub>), 128.6 (CH<sub>Ar</sub>), 128.5 (CH<sub>Ar</sub>), 128.0 (CHC<sub>Ar</sub>), 127.9 (CH<sub>Ar</sub>), 85.9 (C1), 78.4 (C5), 75.0 (C3), 73.8 (CH<sub>2</sub>Ph), 70.4 (C2), 69.0 (C6), 60.0 (C4), 21.0 (COCH<sub>3</sub>), 20.9 (COCH<sub>3</sub>); IR ν (film, cm<sup>-1</sup>) 3122 (=C-H), 2926 (-CH<sub>2</sub>), 2110 (N<sub>3</sub>), 1752 (C=O); ESIHRMS *m/z* = 494.1360 [M+Na]<sup>+</sup>. C<sub>23</sub>H<sub>25</sub>N<sub>3</sub>O<sub>6</sub>SNa requires 494.1362.

**Phenyl 2,3,6-tri-*O*-acetyl-4-azido-thio-β-D-glucopyranoside.** To a stirred solution of **4b** (1.48g, 3.14 mmol, 1 eq.) in dry acetic anhydride (5.6 mL) at 0 °C was added dropwise a solution of NaI (471 mg, 3.14 mmol, 1 eq) in MeCN (1.9 mL) followed by BF<sub>3</sub>•OEt<sub>2</sub> (1.16 mL, 4.71 mmol, 1.5 eq). After completion of the reaction, the reaction mixture was quenched with aqueous Na<sub>2</sub>S<sub>2</sub>O<sub>3</sub> until neutralization and extracted with EtOAc (15 mL). The organic layer was washed with water (3 x 15 mL), brine (3 x 15 mL), dried over Na<sub>2</sub>SO<sub>4</sub> and concentrated under vacuum. The crude product was purified by flash chromatography (Heptane/EtOAc 90:10 to 75:25) to afford the desired

<sup>4</sup> Experimental data agree with those reported in the literature: M. C. Andersen, S. K. Kracun, M. G. Rydahl, W. G. Willats and M. H. Clausen, *Chem. Eur. J.*, 2016, **22**, 11543.

<sup>5</sup> Experimental data agree with those reported in the literature: P. Tiwari and A. K. Misra, *Carbohydr. Res.*, 2006, **341**, 339.

<sup>6</sup> Experimental data agree with those reported in the literature: S. Dara, V. Saikam, M. Yadav, P. P. Singh and R. A. Vishwakarma, *Carbohydr Res*, 2014, **391**, 93.

clean product (0.8242 g, 62%) as a colorless oil.  $[\alpha]_{\text{D}}^{25} = -2.80$  ( $c=1$ ,  $\text{CHCl}_3$ );  $^1\text{H NMR}$  (300 MHz,  $\text{CDCl}_3$ ) : 7.56-7.44 (m, 2H,  $H_{\text{Ar}}$ ), 7.37-7.28 (m, 3H,  $H_{\text{Ar}}$ ), 5.21 (t, 1H,  $J_{2,3}=J_{3,4}=10.5$  Hz,  $H_3$ ), 4.91 (t, 1H,  $J_{1,2}=J_{2,3}=10.5$  Hz,  $H_2$ ), 4.68 (d, 1H,  $J_{1,2}=10.5$  Hz,  $H_1$ ), 4.52-4.45 (dd, 1H,  $J_{6,6'}=12.5$  Hz and  $J_{6,5}=2.0$  Hz,  $H_6$ ), 4.30-4.21 (dd, 1H,  $J_{6,6'}=12.5$  Hz and  $J_{6,5}=5.0$  Hz,  $H_{6'}$ ), 3.64 (t, 1H,  $J_{4,5}=J_{3,4}=10.0$  Hz,  $H_4$ ), 3.54-3.46 (ddd, 1H,  $J_{4,5}=10.2$  Hz,  $J_{6,5}=5.0$  Hz and  $J_{6,5}=2.0$  Hz,  $H_5$ ), 2.13 (s, 3H,  $\text{CH}_3$ ), 2.12 (s, 3H,  $\text{CH}_3$ ), 2.11 (s, 3H,  $\text{CH}_3$ );  $^{13}\text{C NMR}$  (75 MHz,  $\text{CDCl}_3$ ) : 170.38 (C=O), 169.87 (C=O), 169.48 (C=O), 133.4 ( $2^*\text{CH}_{\text{Ar}}$ ), 128.9 ( $2^*\text{CH}_{\text{Ar}}$ ), 128.5 ( $\text{C}_{\text{qAr}}$ ), 85.6 (C1), 75.9 (C5), 74.7 (C3), 69.8 (C2), 62.8 (C6), 59.9 (C4), 20.8 ( $\text{COCH}_3$ ), 20.6 ( $\text{COCH}_3$ ); IR  $\nu$  (film,  $\text{cm}^{-1}$ ) : 2952 (-CH<sub>2</sub>), 2109 (N<sub>3</sub>), 1745 (C=O); ESIHRMS  $m/z = 446.1004$  [ $\text{M}+\text{Na}$ ]<sup>+</sup>.  $\text{C}_{18}\text{H}_{21}\text{N}_3\text{O}_7\text{SNa}$  requires 446.0998.

**2,3,6-Tri-*O*-acetyl-4-azido- $\beta$ -D-glucopyranosyl phenyl sulfoxide 7.** To a stirred solution the previous described sulfide compound (1.4 g, 3.27 mmol, 1 eq.) in  $\text{CH}_2\text{Cl}_2$  (31 mL) was added *m*-CPBA (75%, 0.85 g, 3.92 mmol, 1.2 eq.) at  $-78$  °C under argon atmosphere. The resulting mixture was stirred at  $-30$  °C overnight and a solution of aqueous  $\text{Na}_2\text{S}_2\text{O}_3/\text{NaHCO}_3$  50:50 (20/20 mL) was then added. The solution was allowed to warm at room temperature, extracted with EtOAc (2 x 30 mL). Organics layers were dried over  $\text{Na}_2\text{SO}_4$ , filtered and concentrated under vacuum. The crude product was purified by flash chromatography (Heptane/EtOAc 80:20 to 50:50) to afford the clean product **7** as a mixture of two diastereoisomers (dr = 1:1, 1.2 g, 84%) as a colorless oil.  $^1\text{H NMR}$  (300 MHz,  $\text{CDCl}_3$ ) : 7.71-7.50 (m, 10H,  $H_{\text{Ar}}$ ), 5.40-5.14 (m, 4H,  $H_2$ ,  $H_3$ ), 4.51-4.44 (m, 2H,  $H_6$ ), 4.31 (dd, 1H,  $J_{6,6'}=12.0$  Hz and  $J_{6,5}=1.5$  Hz,  $H_6$ ), 4.24 (d, 1H,  $J_{2,1}=9.5$  Hz,  $H_1$ ), 4.22-4.09 (m, 2H,  $H_1$ ,  $H_6$ ), 3.70-3.56 (m, 2H,  $H_4$ ), 3.52-3.47 (m, 1H,  $H_5$ ), 3.43-3.33 (m, 1H,  $H_5$ ), 2.14 (s, 3H,  $\text{CH}_3$ ), 2.12 (s, 3H,  $\text{CH}_3$ ), 2.11 (s, 3H,  $\text{CH}_3$ ), 2.08 (s, 3H,  $\text{CH}_3$ ), 2.02 (s, 3H,  $\text{CH}_3$ ), 1.86 (s, 3H,  $\text{CH}_3$ );  $^{13}\text{C NMR}$  (75 MHz,  $\text{CDCl}_3$ ) : 170.2 (C=O), 170.1 (C=O), 169.9 (C=O), 169.5 (C=O), 169.2 (C=O), 131.7 ( $\text{C}_{\text{Ar}}$ ), 131.5 ( $\text{C}_{\text{Ar}}$ ), 129.0 ( $\text{C}_{\text{Ar}}$ ), 128.9 ( $\text{C}_{\text{Ar}}$ ), 125.7 ( $\text{C}_{\text{Ar}}$ ), 125.4 ( $\text{C}_{\text{Ar}}$ ), 92.4 (C1), 90.1 (C1), 77.5 (C5), 77.0 (C5), 74.9 (C3), 74.6 (C3), 67.5 (C2), 67.1 (C2), 62.4 (C6), 62.2 (C6), 59.6 (C4), 59.3 (C4), 20.7 ( $\text{COCH}_3$ ), 20.6 ( $\text{COCH}_3$ ), 20.5 ( $\text{COCH}_3$ ); IR  $\nu$  (film,  $\text{cm}^{-1}$ ) : 2942 (-CH<sub>2</sub>), 2110 (N<sub>3</sub>), 1741 (C=O); ESIHRMS  $m/z = 901.2006$  [ $2\text{M}+\text{Na}$ ]<sup>+</sup>.  $\text{C}_{36}\text{H}_{42}\text{N}_6\text{O}_{16}\text{S}_2\text{Na}$  requires 901.2006.

**2,3-Di-*O*-acetyl-4-azido-6-*O*-benzyl- $\beta$ -D-glucopyranosyl phenyl sulfoxide 8.** To a stirred solution of **4b** (1.0 g, 2.12 mmol, 1 eq.) in  $\text{CH}_2\text{Cl}_2$  (21 mL) was added *m*-CPBA (above 75%, 550 mg, 3.18 mmol, 1.5 eq.) at  $-78$  °C under argon atmosphere. The resulting mixture was stirred at  $-30$  °C overnight and dimethylsulfide (0.2 mL) was then added. The solution was allowed to warm at room temperature, diluted with  $\text{CH}_2\text{Cl}_2$  (10 mL), washed with water (8 mL), with a saturated aqueous solution of  $\text{NaHCO}_3$  (8 mL), with water again (8 mL) and finally with brine (8 mL). The organic phase was dried with  $\text{Na}_2\text{SO}_4$ , filtered and concentrated under vacuum. The crude product was purified by flash chromatography on silica gel (Heptane/EtOAc 80:20 to 60:40) to afford product **8** (914 mg, 1.875 mmol, 89%) as a colorless oil and as a mixture of two diastereoisomers (dr = 2:3).  $^1\text{H NMR}$  (300 MHz,  $\text{CDCl}_3$ )  $\delta$  7.71-7.59 (m, 2H,  $H_{\text{Ar}}$ ), 7.55-7.42 (m, 3H,  $H_{\text{Ar}}$ ), 7.42-7.21 (m, 5H,  $H_{\text{Ar}}$ ), 5.29 (t, 0.4H,  $J_{2x,1x} = J_{2x,3x} = 9.5$  Hz,  $H_{2x}$ ), 5.24 (t, 0.6H,  $J_{2y,1y} = J_{2y,3y} = 9.0$  Hz  $H_{2y}$ ), 5.19 (t, 0.4H,  $J_{3x,2x} = J_{3x,4x} = 9.5$  Hz,  $H_{3x}$ ), 5.16 (t, 0.6H,  $J_{3y,2y} = J_{3y,4y} = 9.0$  Hz,  $H_{3y}$ ), 4.56-4.36 (m, 2.6H,  $\text{CH}_2\text{Ph}$ ,  $H_{1y}$ ), 4.25 (d, 0.4H,  $J_{1x,2x} = 9.5$  Hz,  $H_{1x}$ ), 3.82-3.69 (m, 2.2H,  $H_6$ ,  $H_6'$ ), 3.69-3.56 (m, 1H,  $H_4$ ), 3.48-3.38 (dt, 0.6H,  $J_{5y,4y} = 10.0$  Hz,  $J_{5y,6y} = 5.0$  Hz and  $J_{5y,6y} = 2.5$  Hz,  $H_{5y}$ ), 3.36-3.24 (ddd, 0.4H,  $J_{5x,4x} = 10.0$  Hz,  $J_{5x,6x} = 6.0$  Hz and  $J_{5x,6x} = 4.0$  Hz,  $H_{5x}$ ), 2.10 (s, 1.2H,  $\text{OCOCH}_3x$ ), 2.08 (s, 1.8H,  $\text{OCOCH}_3y$ ), 2.06 (s, 1.2H,  $\text{OCOCH}_3x$ ), 1.83 (s, 1.8H,  $\text{OCOCH}_3y$ );  $^{13}\text{C NMR}$  (75 MHz,  $\text{CDCl}_3$ )  $\delta$  170.4 (C=O), 170.3 (C=O), 169.7 (C=O), 169.4 (C=O), 139.6 ( $\text{C}_{\text{qAr}}$ ), 139.0 ( $\text{C}_{\text{qAr}}$ ), 137.8 ( $\text{C}_{\text{qAr}}$ ), 137.7 ( $\text{C}_{\text{qAr}}$ ), 131.8 ( $\text{CH}_{\text{Ar}}$ ), 131.7 ( $\text{CH}_{\text{Ar}}$ ), 129.2 ( $\text{CH}_{\text{Ar}}$ ), 129.1 ( $\text{CH}_{\text{Ar}}$ ), 128.6 ( $\text{CH}_{\text{Ar}}$ ), 128.5 ( $\text{CH}_{\text{Ar}}$ ), 128.1 ( $\text{CH}_{\text{Ar}}$ ), 128.0 ( $\text{CH}_{\text{Ar}}$ ), 127.9 ( $\text{CH}_{\text{Ar}}$ ), 127.9 ( $\text{CH}_{\text{Ar}}$ ), 125.8 ( $\text{CH}_{\text{Ar}}$ ), 125.6 ( $\text{CH}_{\text{Ar}}$ ), 93.0 (C1y), 90.5 (C1x), 79.3 (C5x), 79.0 (C5y), 75.1 (C2y), 74.8 (C3y), 73.8 ( $\text{CH}_2\text{Ph}$ ), 68.6 (C6x), 68.4 (C6y), 67.8 (C2x), 67.4 (C3x), 59.4 (C4y), 59.2 (C4x), 20.9 ( $\text{COCH}_3$ ), 20.8 ( $\text{COCH}_3$ ), 20.7 ( $\text{COCH}_3$ ); IR  $\nu$  (film,  $\text{cm}^{-1}$ ) 2988 (=C-H), 2901 (-CH<sub>2</sub>), 2110 (N<sub>3</sub>), 1755 (C=O); ESIHRMS  $m/z = 510.1312$  [ $\text{M}+\text{Na}$ ]<sup>+</sup>.  $\text{C}_{23}\text{H}_{25}\text{N}_3\text{O}_7\text{SNa}$  requires 510.1311.

***N*-Acetyl-cytosine 9.** To a stirred solution of cytosine (500 mg, 4.5 mmol, 1eq.) in pyridine (2.5 mL) was added acetic anhydride (2.1 mL, 22.05 mmol, 5 eq.). The resulting mixture was stirred overnight at room temperature then diluted with EtOAc (2.0 mL) and stirred again for 30 min at room temperature. The resulting white solid was filtered, washed with EtOAc, co-evaporated with toluene and dried under vacuum to afford clean product **9** (0.6521 g, 95%) as a white solid.  $^1\text{H NMR}$  ( $\text{DMSO}-d_6$ )  $\delta$  11.50 (bs, 1H,  $\text{NH}$ ), 10.75 (bs, 1H,  $\text{NH}$ ), 7.80 (d,  $J = 7$  Hz,  $\text{CH}$ -cytosine), 7.09, (d,  $J = 7$  Hz, 1H,  $\text{CH}$ -cytosine), 2.08 (s, 3H,  $\text{CH}_3$ ).<sup>7</sup>

***N*-Benzoyl-5-methyl-cytosine 10.**<sup>8</sup> To a suspension of 5-methyl-cytosine (1.5 g, 12 mmol, 1eq.) in dry MeCN (40 mL) was added benzoic anhydride (3.25 g, 14.4 mmol, 1.2 eq.) followed by DMAP (293 mg, 2.4 mmol, 0.2 eq.) under argon atmosphere. The resulting mixture was refluxed for 24 h then EtOH (25 mL) was added to the hot

<sup>7</sup> Prepared following H. Pelissier, J. Rodriguez and K. P. C. Vollhardt, *Chem. Eur. J.*, 1999, **5**, 3549.

<sup>8</sup> Prepared following S. Buchini and C. J. Leumann, *Eur. J. Org. Chem.*, 2006, **2006**, 3152.

solution. The solution was cooled to room temperature and the resulting solid was filtered, washed with EtOH (15 mL) and Et<sub>2</sub>O (15 mL) and dried under vacuum to afford clean product **10** (1.913 g, 70%) as a white solid.

**N-Benzoyl-5-fluoro-cytosine 13.** To a suspension of 5-fluoro-cytosine (1.5 g, 11.6 mmol, 1 eq.) in dry MeCN (15 mL) was added benzoic anhydride (3.15g, 13.9 mmol, 1.2 eq.) followed by DMAP (283 mg, 2.32 mmol, 0.2 eq.) under argon atmosphere. The resulting mixture was refluxed for 24 h then EtOH (2 mL) was added to the hot solution. The solution was cooled to room temperature and the resulting solid was filtered, washed with EtOH (15 mL) and Et<sub>2</sub>O (15 mL) and dried under vacuum to afford clean product **13** (1.9 g, 70%) as a white solid. <sup>1</sup>H NMR (DMSO-d<sub>6</sub>, 300 MHz) δ 8.01 (bd, J = 7.4, 3H), 7.60 (t, J = 7.4 Hz, 1H), 7.49 (t, J = 7.7 Hz, 2H).<sup>9</sup>

**2,3,6-Tri-O-acetyl-4-azido-1-N-thymine-β-D-glucopyranoside 16.** The general procedure was followed using **7** (70 mg, 0.16 mmol), **10** (32 mg, 0.256 mmol), BSA (0.16 mL, 0.64 mmol), TMSOTf (43 μL, 0.24 mmol, 1.5 eq.), 4 Å molecular sieves (150 mg) in dry MeCN (3mL). The residue was purified by preparative TLC (Hept/EtOAc 20:80) to afford product **16** (63 mg, 89%) as a white powder. [α]<sub>D</sub><sup>25</sup> + 8.7 (c = 0.9, CHCl<sub>3</sub>); <sup>1</sup>H NMR (300 MHz, CDCl<sub>3</sub>) δ 8.68 (s, 1H, NH), 7.05 (d, 1H, J<sub>HAr,CH3</sub> = 1.3 Hz, H<sub>Ar</sub>), 5.82 (d, 1H, J<sub>1,2</sub> = 9.5 Hz, H<sub>1</sub>), 5.35 (t, 1H, J<sub>3,2</sub> = J<sub>3,4</sub> = 9.5 Hz, H<sub>3</sub>), 5.10 (t, 1H, J<sub>2,1</sub> = J<sub>2,3</sub> = 9.5 Hz, H<sub>2</sub>), 4.37 (dd, 1H, J<sub>6,6</sub> = 12.5 Hz and J<sub>6,5</sub> = 1.5 Hz, H<sub>6</sub>), 4.25 (dd, 1H, J<sub>6',6</sub> = 12.5 Hz, J<sub>6',5</sub> = 4.5 Hz, H<sub>6'</sub>), 3.71-3.64 (m, 2H, H<sub>4</sub>, H<sub>5</sub>), 2.11 (s, 3H, C(O)CH<sub>3</sub>), 2.10 (s, 3H, C(O)CH<sub>3</sub>), 1.97 (s, 3H, C(O)CH<sub>3</sub>), 1.92 (d, 3H, J<sub>CH<sub>3</sub>,HAr</sub> = 1.0 Hz, C<sub>Ar</sub>CH<sub>3</sub>); <sup>13</sup>C NMR (75 MHz, CDCl<sub>3</sub>) δ 170.4 (C=O), 169.7 (C=O), 169.4 (C=O), 162.9 (C<sub>qAr</sub>), 150.2 (C<sub>qAr</sub>), 134.3 (CH<sub>Ar</sub>), 112.3 (C<sub>qAr</sub>), 80.2 (C<sub>1</sub>), 75.1 (C<sub>5</sub>), 73.5 (C<sub>3</sub>), 69.3 (C<sub>2</sub>), 62.6 (C<sub>6</sub>), 59.9 (C<sub>4</sub>), 20.8 (C(O)CH<sub>3</sub>), 20.6 (C(O)CH<sub>3</sub>), 20.4 (C(O)CH<sub>3</sub>), 12.6 (C<sub>Ar</sub>CH<sub>3</sub>); IR ν (film, cm<sup>-1</sup>) 3220 (N-H), 3075 (=C-H), 2931 (CH<sub>3</sub>), 2111 (N<sub>3</sub>), 1748 (C=O), 1690 (NH-C=O); ESIHRMS m/z = 440.1418 [M+H]<sup>+</sup>. C<sub>17</sub>H<sub>22</sub>N<sub>5</sub>O<sub>9</sub> requires 440.1409.

**2,3,6-Tri-O-acetyl-4-azido-1-N-(5-fluoro-uracil)-β-D-glucopyranoside 17.** The general procedure was followed using **7** (70 mg, 0.16 mmol), **11** (33 mg, 0.256 mmol), BSA (0.16 mL, 0.64 mmol), TMSOTf (43 μL, 0.24 mmol, 1.5 eq.), 4 Å molecular sieves (150 mg) in dry MeCN (3 mL). The residue was purified by preparative TLC (Hept/EtOAc 30:70) to afford product **17** (49 mg, 68%) as a yellow powder. [α]<sub>D</sub><sup>25</sup> + 23.0 (c = 1.0, CHCl<sub>3</sub>); <sup>1</sup>H NMR (300 MHz, CDCl<sub>3</sub>) δ 9.48 (d, 1H, J<sub>NH,F</sub> = 4.5 Hz, NH), 7.34 (d, 1H, J<sub>HAr,F</sub> = 5.5 Hz, H<sub>Ar</sub>), 5.84 (d, 1H, J<sub>1,2</sub> = 9.5 Hz, H<sub>1</sub>), 5.39 (t, 1H, J<sub>3,2</sub> = J<sub>3,4</sub> = 9.5 Hz, H<sub>3</sub>), 5.03 (t, 1H, J<sub>2,3</sub> = J<sub>2,1</sub> = 9.5 Hz, H<sub>2</sub>), 4.39 (dd, 1H, J<sub>6,6</sub> = 12.5 Hz and J<sub>6,5</sub> = 1.5 Hz, H<sub>6</sub>), 4.25 (dd, 1H, J<sub>6',6</sub> = 12.5 Hz and J<sub>6',5</sub> = 4.5 Hz, H<sub>6'</sub>), 3.80-3.71 (m, 1H, H<sub>5</sub>), 3.66 (dd, 1H, J<sub>4,5</sub> = 10.5 Hz and J<sub>4,3</sub> = 9.5 Hz, H<sub>4</sub>), 2.11 (s, 3H, CH<sub>3</sub>), 2.10 (s, 3H, CH<sub>3</sub>), 1.98 (s, 3H, CH<sub>3</sub>); <sup>13</sup>C NMR (75 MHz, CDCl<sub>3</sub>) δ 170.4 (C=O), 169.9 (C=O), 169.5 (C=O), 156.4 (d, J<sub>C-F</sub> = 27 Hz, C<sub>qAr</sub>), 142.4 (C<sub>qAr</sub>), 139.3 (C<sub>qAr</sub>), 123.3 (d, J<sub>C-F</sub> = 34 Hz, CH<sub>Ar</sub>), 80.5 (C<sub>1</sub>), 75.0 (C<sub>5</sub>), 73.1 (C<sub>3</sub>), 69.5 (C<sub>2</sub>), 62.4 (C<sub>6</sub>), 59.7 (C<sub>4</sub>), 20.8 (C(O)CH<sub>3</sub>), 20.6 (C(O)CH<sub>3</sub>), 20.4 (C(O)CH<sub>3</sub>); IR ν (film, cm<sup>-1</sup>) 3222 (N-H), 3096 (=C-H), 2116 (N<sub>3</sub>), 1712 (C=O), 1673 (NH-C=O); ESIHRMS m/z = 444.1167 [M+H]<sup>+</sup>. C<sub>16</sub>H<sub>19</sub>N<sub>5</sub>O<sub>9</sub>F requires 444.1180.

**2,3,6-Tri-O-acetyl-4-azido-1-N-(4-N-benzoyl-5-methyl-cytosine)-β-D-glucopyranoside 18.** The general procedure was followed using **7** (70 mg, 0.16 mmol), **12** (59 mg, 0.256 mmol), BSA (0.16 mL, 0.64 mmol), TMSOTf (43 μL, 0.24 mmol, 1.5 eq.), 4 Å molecular sieves (150 mg) in dry MeCN (3 mL). The residue was purified by preparative TLC (Hept/EtOAc 30:70) to afford product **18** (76 mg, 88%) as a white powder. [α]<sub>D</sub><sup>25</sup> + 4.1 (c = 1.2, CHCl<sub>3</sub>); <sup>1</sup>H NMR (300 MHz, CDCl<sub>3</sub>) δ 8.39-8.19 (m, 2H, H<sub>Ar</sub>), 7.59-7.36 (m, 3H, H<sub>Ar</sub>), 7.20 (d, 1H, J<sub>HAr,CH<sub>3</sub></sub> = 1.5 Hz, H<sub>Ar</sub>), 5.85 (d, 1H, J<sub>1,2</sub> = 9.5 Hz, H<sub>1</sub>), 5.35 (m, 1H, H<sub>3</sub>), 5.12 (t, 1H, J<sub>2,1</sub> = J<sub>2,3</sub> = 9.5 Hz, H<sub>2</sub>), 4.38 (d, 1H, J<sub>6,6</sub> = 12.5 Hz, H<sub>6</sub>), 4.27 (dd, 1H, J<sub>6',6</sub> = 12.5 Hz and J<sub>6',5</sub> = 3.5 Hz, H<sub>6'</sub>), 3.79-3.61 (m, 2H, H<sub>4</sub>, H<sub>5</sub>), 2.12 (s, 3H, CH<sub>3</sub>), 2.11 (s, 3H, COCH<sub>3</sub>), 1.98 (s, 3H, COCH<sub>3</sub>); <sup>13</sup>C NMR (75 MHz, CDCl<sub>3</sub>) δ 180.0 (C=O), 170.5 (C=O), 170.0 (C=O), 169.6 (C=O), 159.0 (C<sub>qAr</sub>), 148.2 (C<sub>qAr</sub>), 136.9 (C<sub>qAr</sub>), 135.5 (CH<sub>Ar</sub>), 133.0 (CH<sub>Ar</sub>), 130.2 (CH<sub>Ar</sub>), 128.4 (CH<sub>Ar</sub>), 113.3 (C<sub>qAr</sub>), 80.6 (C<sub>1</sub>), 75.4 (C<sub>5</sub>), 73.8 (C<sub>3</sub>), 69.8 (C<sub>2</sub>), 62.9 (C<sub>6</sub>), 60.1 (C<sub>4</sub>), 20.8 (C(O)CH<sub>3</sub>), 20.6 (C(O)CH<sub>3</sub>), 14.0 (CH<sub>3</sub>); IR ν (film, cm<sup>-1</sup>) 3072 (=C-H), 2959 (C-H), 2110 (N<sub>3</sub>), 1740 (C=O), 1707 (C=O), 1656 (NH-C=O); ESIHRMS m/z = 543.1835 [M+H]<sup>+</sup>. C<sub>24</sub>H<sub>27</sub>N<sub>6</sub>O<sub>9</sub> requires 543.1840.

**2,3,6-Tri-O-acetyl-4-azido-1-N-(4-N-benzoyl-5-fluoro-cytosine)-β-D-glucopyranoside 19.** The general procedure was followed using **7** (70 mg, 0.16 mmol), **13** (56 mg, 0.256 mmol), BSA (0.16 mL, 0.64 mmol), TMSOTf (43 μL, 0.24 mmol, 1.5 eq.), 4 Å molecular sieves (150 mg) in dry MeCN (3 mL). The residue was purified by preparative TLC (Hept/EtOAc 20:80) to afford product **19** (75 mg, 75%) as a white powder. [α]<sub>D</sub><sup>20</sup> = + 37.4 (c = 0.5, MeOH); <sup>1</sup>H NMR (300 MHz, CDCl<sub>3</sub>) δ 8.26 (d, 2H, J<sub>HAr,HAr</sub> = 7.5 Hz, H<sub>Ar</sub>), 7.55 (t, 1H, J<sub>HAr,HAr</sub> = 7.5 Hz, H<sub>Ar</sub>), 7.47-7.39 (m, 3H, H<sub>Ar</sub>), 5.82 (d, 1H, J<sub>1,2</sub> = 9.5 Hz, H<sub>1</sub>), 5.37 (t, 1H, J<sub>3,2</sub> = J<sub>3,4</sub> = 9.5 Hz, H<sub>3</sub>), 5.03 (t, 1H, J<sub>2,3</sub> = J<sub>2,1</sub> = 9.5 Hz, H<sub>2</sub>), 4.39 (d, 1H, J<sub>H<sub>6</sub>,H<sub>6'</sub></sub> = 12.5 Hz, H<sub>6</sub>), 4.27 (dd, 1H, J<sub>H<sub>6',H<sub>6</sub></sub> = 12.5 Hz and J<sub>H<sub>6',H<sub>5</sub></sub> = 4.0 Hz, H<sub>6'</sub>), 3.72-3.63 (m, 2H, H<sub>4</sub>,</sub></sub>

<sup>9</sup> Prepared following M. F. Caso, D. D'Alonzo, S. D'Errico, G. Palumbo and A. Guaragna, *Org. Lett.*, 2015, **17**, 2626.

H5), 2.12 (s, 3H, CH<sub>3</sub>), 2.11 (s, 3H, CH<sub>3</sub>), 1.99 (s, 3H, CH<sub>3</sub>); <sup>13</sup>C NMR (75 MHz, CDCl<sub>3</sub>) δ 170.5 (C=O), 170.1 (C=O), 169.5 (C=O), 151.8 (d, J<sub>C-F</sub> = 19 Hz, C<sub>qAr</sub>), 146.8 (C<sub>qAr</sub>), 141.8 (C<sub>qAr</sub>), 138.7 (CH<sub>Ar</sub>), 135.7 (CH<sub>Ar</sub>), 133.7 (CH<sub>Ar</sub>), 130.4 (CH<sub>Ar</sub>), 128.6 (CH<sub>Ar</sub>), 124.0 (d, J<sub>C-F</sub> = 35 Hz, CH<sub>Ar</sub>), 81.1 (C1), 75.5 (C5), 73.4 (C3), 69.8 (C2), 62.7 (C6), 60.0 (C4), 21.0 (C(O)CH<sub>3</sub>), 20.7 (C(O)CH<sub>3</sub>), 20.6 (C(O)CH<sub>3</sub>); IR ν (film, cm<sup>-1</sup>) 3100 (=C-H), 2113 (N<sub>3</sub>), 1754 (C=O), 1674 (NH-C=O) ESIHRMS *m/z* = 547.1589 [M+H]<sup>+</sup>. C<sub>23</sub>H<sub>24</sub>N<sub>6</sub>O<sub>9</sub>F requires 547.1589.

**2,3,6-Tri-*O*-acetyl-4-azido-1-*N*-uracil-β-*D*-glucopyranoside 20.** The general procedure was followed using **7** (70 mg, 0.16 mmol), **14** (29 mg, 0.256 mmol), BSA (0.16 mL, 0.64 mmol), TMSOTf (43 μL, 0.24 mmol, 1.5 eq.), 4 Å molecular sieves (150 mg) in dry MeCN (3 mL). The residue was purified by preparative TLC (Hept/EtOAc 20:80) to afford product **20** (63 mg, 94%) as a white powder. [α]<sub>D</sub><sup>25</sup> + 24.1 (*c* = 1.0, CHCl<sub>3</sub>); <sup>1</sup>H NMR (300 MHz, CDCl<sub>3</sub>) δ 9.13 (bs, 1H, NH), 7.21 (d, 1H, J<sub>HAr,HAr</sub> = 8.5 Hz, H<sub>Ar</sub>), 5.77 (d, 1H, J<sub>1,2</sub> = 9.5 Hz, H1), 5.74 (d, 1H, J<sub>HAr,HAr</sub> = 8.5 Hz, H<sub>Ar</sub>), 5.32 (t, 1H, J<sub>3,2</sub> = J<sub>3,4</sub> = 9.0 Hz, H3), 5.03 (dd, 1H, J<sub>2,1</sub> = 9.5 Hz, J<sub>2,3</sub> = 9.0 Hz, H2), 4.33 (d, 1H, J<sub>6,6'</sub> = 12.5 Hz, H6), 4.20 (dd, 1H, J<sub>6,6'</sub> = 12.5 Hz and J<sub>6,5</sub> = 3.0 Hz, H6'), 3.72-3.53 (m, 2H, H4, H5), 2.05 (s, 6H, 2 CH<sub>3</sub>), 1.93 (s, 3H, CH<sub>3</sub>); <sup>13</sup>C NMR (75 MHz, CDCl<sub>3</sub>) δ 170.5 (C=O), 169.9 (C=O), 169.6 (C=O), 162.4 (C<sub>qAr</sub>), 150.3 (C<sub>qAr</sub>), 139.1 (CH<sub>Ar</sub>), 104.0 (CH<sub>Ar</sub>), 80.5 (C1), 75.4 (C5), 73.6 (C3), 69.6 (C2), 62.7 (C6), 60.1 (C4), 21.0 (CH<sub>3</sub>), 20.8 (CH<sub>3</sub>), 20.5 (CH<sub>3</sub>); IR ν (film, cm<sup>-1</sup>) 2960 (=C-H), 2111 (N<sub>3</sub>), 1748 (C=O), 1689 (NH-C=O); ESIHRMS *m/z* = 426.1260 [M+H]<sup>+</sup>. C<sub>16</sub>H<sub>19</sub>N<sub>5</sub>O<sub>9</sub>F requires 426.1261.

**2,3-Di-*O*-acetyl-4-azido-6-*O*-benzyl-1-*N*-(*N*-acetyl-cytosine)-β-*D*-glucopyranoside 21.** The General Procedure was followed using **8** (50 mg, 0.10 mmol), **9** (25 mg, 0.16 mmol), BSA (0.1 mL, 0.41 mmol), TMSOTf (22 μL, 0.12 mmol), 4 Å molecular sieves (50 mg) in dry MeCN (1 mL). The residue was purified by preparative TLC (Heptane/EtOAc 1:1) to afford product **21** (28 mg, 0.05 mmol, 54%) as a colorless oil. [α]<sub>D</sub><sup>25</sup> + 47.5 (*c* = 1.0, CHCl<sub>3</sub>); <sup>1</sup>H NMR (300 MHz, CDCl<sub>3</sub>) δ 7.67 (d, 1H, J<sub>HAr,HAr</sub> = 7.5 Hz, H<sub>Ar</sub>), 7.47 (d, 1H, J<sub>HAr,HAr</sub> = 7.5 Hz, H<sub>Ar</sub>), 7.36-7.27 (m, 5H, H<sub>Ar</sub>), 5.99 (d, 1H, J<sub>1,2</sub> = 9.5 Hz, H1), 5.32 (dd, 1H, J<sub>3,2</sub> = 9.5 Hz and J<sub>3,4</sub> = 10.0 Hz, H3), 5.03 (t, 1H, J<sub>2,3</sub> = J<sub>2,1</sub> = 9.5 Hz, H2), 4.57 (d, 1H, J<sub>H,H</sub> = 12.0 Hz, CH<sub>2</sub>Ph), 4.52 (d, 1H, J<sub>H,H</sub> = 12.0 Hz, CH<sub>2</sub>Ph), 3.94 (t, 1H, J<sub>4,3</sub> = J<sub>4,5</sub> = 10.0 Hz, H6), 3.80-3.67 (m, 2H, H6), 3.60 (ddd, 1H, J<sub>5,4</sub> = 10.0 Hz and J<sub>5,6</sub> = 3.5 Hz, J<sub>5,6'</sub> = 2.0 Hz, H5), 2.23 (s, 3H, NHCOCH<sub>3</sub>), 2.08 (s, 3H, OCOCH<sub>3</sub>), 1.92 (s, 3H, OCOCH<sub>3</sub>); <sup>13</sup>C NMR (75 MHz, MeOD) δ 170.0 (C=O), 169.7 (C=O), 163.1 (C<sub>qAr</sub>), 155.3 (C<sub>qAr</sub>), 144.5 (CH<sub>Ar</sub>), 137.6 (C<sub>qAr</sub>), 128.7 (CH<sub>Ar</sub>), 128.2 (CH<sub>Ar</sub>), 128.1 (CH<sub>Ar</sub>), 98.0 (CH<sub>Ar</sub>), 81.5 (C1), 77.3 (C5), 73.9 (CH<sub>2</sub>Ph), 73.5 (C2), 71.0 (C3), 68.2 (C6), 59.7 (C4), 25.2 (COCH<sub>3</sub>), 20.8 (COCH<sub>3</sub>), 20.6 (COCH<sub>3</sub>); IR ν (film, cm<sup>-1</sup>) 3148 (=C-H), 2110 (N<sub>3</sub>), 1754 (C=O), 1667 (NH-C=O); ESIHRMS *m/z* = 515.1878 [M+H]<sup>+</sup>. C<sub>23</sub>H<sub>27</sub>N<sub>6</sub>O<sub>8</sub> requires 515.1890.

**2,3-Di-*O*-acetyl-4-azido-6-*O*-benzyl-1-*N*-thymine-β-*D*-glucopyranoside 22.** The General Procedure was followed using **8** (581 mg, 1.2 mmol), Thymine **10** (267 mg, 2.1 mmol), BSA (1.3 mL, 5.29 mmol), TMSOTf (1.6 mL, 1.9 mmol) in dry MeCN (25 mL). The residue was purified by flash chromatography on silica gel (Heptane/EtOAc 70:30 to 60:40) to afford product **22** (496 mg, 77%) as a white powder. [α]<sub>D</sub><sup>25</sup> + 11.1 (*c* = 1.0, CHCl<sub>3</sub>); <sup>1</sup>H NMR (300 MHz, CDCl<sub>3</sub>) δ 7.42-7.25 (m, 5H, H<sub>Ar</sub>), 7.11 (d, 1H, J<sub>HAr,CH3</sub> = 1.0 Hz, H<sub>Ar</sub>), 5.79 (d, 1H, J<sub>1,2</sub> = 9.5 Hz, H1), 5.29 (dd, 1H, J<sub>3,2</sub> = 9.5 Hz and J<sub>3,4</sub> = 10.0 Hz, H3), 5.07 (t, 1H, J<sub>2,1</sub> = J<sub>2,3</sub> = 9.5 Hz, H2), 4.59 (d, 1H, J<sub>H,H</sub> = 12.0 Hz, CH<sub>2</sub>Ph), 4.52 (d, 1H, J<sub>H,H</sub> = 12.0 Hz, CH<sub>2</sub>Ph), 3.90 (t, 1H, J<sub>4,3</sub> = J<sub>4,5</sub> = 10.0 Hz, H4), 3.79-3.66 (m, 2H, H6, H6'), 2.08 (s, 3H, C(O)CH<sub>3</sub>), 1.95 (s, 3H, C(O)CH<sub>3</sub>), 1.91 (d, 3H, J<sub>CH3,HAr</sub> = 1.0 Hz, C<sub>Ar</sub>CH<sub>3</sub>); <sup>13</sup>C NMR (75 MHz, CDCl<sub>3</sub>) δ 169.9 (C=O), 169.8 (C=O), 163.5 (C<sub>qAr</sub>), 150.6 (C<sub>qAr</sub>), 137.6 (C<sub>qAr</sub>), 134.6 (CH<sub>Ar</sub>), 128.7 (CH<sub>Ar</sub>), 128.2 (CH<sub>Ar</sub>), 128.0 (CH<sub>Ar</sub>), 112.3 (C<sub>qAr</sub>), 80.2 (C1), 76.9 (C5), 73.8 (CH<sub>2</sub>Ph), 73.7 (C3), 69.8 (C2), 68.2 (C6), 59.7 (C4), 20.8 (C(O)CH<sub>3</sub>), 20.6 (C(O)CH<sub>3</sub>), 12.6 (C<sub>Ar</sub>CH<sub>3</sub>); IR ν (film, cm<sup>-1</sup>) 3675 (N-H), 2988 (=C-H), 2901 (CH<sub>2</sub>), 2111 (N<sub>3</sub>), 1754 (C=O), 1697 (NH-C=O); ESIHRMS *m/z* = 487.1783 [M+H]<sup>+</sup>. C<sub>22</sub>H<sub>26</sub>N<sub>5</sub>O<sub>8</sub> requires 487.1781.

**2,3-Di-*O*-acetyl-4-azido-6-*O*-benzyl-1-*N*-(5-fluoro-uracil)-β-*D*-glucopyranoside 23.** A mixture of 5-fluoro-uracil **11** (42 mg, 0.31 mmol, 1.5 eq.), hexamethyldisilazane (77 μL, 0.37 mmol, 1.8 eq.) and saccharine (3 mg, 0.01 mmol, 6.5 mol%) in anhydrous MeCN (1.5 mL) was refluxed for 30 min under inert atmosphere. **8** (100 mg, 0.21 mmol, 1 eq.) and TMSOTf (56 μL, 0.37 mmol, 1.5 eq.) were then added and the resulting mixture was refluxed for 6 h, cooled to room temperature, neutralized with saturated aqueous sodium bicarbonate (3 mL) and extracted with CH<sub>2</sub>Cl<sub>2</sub> (8 mL). The organic extract was dried over anhydrous sodium sulfate, filtered and concentrated under reduced pressure. The residue was purified by flash chromatography (Heptane/EtOAc 90:10 to 50:50) to afford the clean product **23** (80 mg, 0.16 mmol, 76%) as a yellow powder. [α]<sub>D</sub><sup>25</sup> + 25.6 (*c* = 1.0, CHCl<sub>3</sub>); <sup>1</sup>H NMR (300 MHz, CDCl<sub>3</sub>) δ 7.41-7.26 (m, 6H, H<sub>Ar</sub>), 5.75 (dd, 1H, J<sub>1,2</sub> = 9.5 Hz and J<sub>1,HAr</sub> = 1.5 Hz, H1), 5.30 (t, 1H, J<sub>3,2</sub> = J<sub>3,4</sub> = 9.5 Hz, H3), 4.97 (t, 1H, J<sub>2,3</sub> = J<sub>2,1</sub> = 9.5 Hz, H2), 4.58 (d, 1H, J<sub>H,H</sub> = 12.0 Hz, CH<sub>2</sub>Ph), 4.53 (d, 1H, J<sub>H,H</sub> = 12.0 Hz, CH<sub>2</sub>Ph), 3.89 (t, 1H, J<sub>4,3</sub> = J<sub>4,5</sub> = 10.0 Hz, H4), 3.80-3.66 (m, 2H, H6, H6'), 3.59 (dt, 1H, J<sub>5,4</sub> = 10.0 Hz, J<sub>5,6</sub> = 5.0 Hz, J<sub>5,6'</sub> = 2.0 Hz, H5), 2.09 (s, 3H, CH<sub>3</sub>), 1.97 (s, 3H, CH<sub>3</sub>); <sup>13</sup>C NMR (75 MHz, CDCl<sub>3</sub>) δ 170.0 (C=O), 169.7 (C=O), 156.5 (d, J<sub>C-F</sub> = 27 Hz, C<sub>qAr</sub>), 149.1 (C<sub>qAr</sub>), 142.6 (C<sub>qAr</sub>), 139.4 (C<sub>qAr</sub>), 137.4 (C<sub>qAr</sub>), 128.7 (CH<sub>Ar</sub>), 128.3 (CH<sub>Ar</sub>),

123.5 (d,  $J_{C-F} = 34$  Hz,  $CH_{Ar}$ ), 80.9 (C1), 77.0 (C5), 73.8 ( $CH_2Ph$ ), 73.3 (C3), 69.9 (C2), 68.1 (C6), 59.5 (C4), 20.8 ( $C(O)CH_3$ ), 20.5 ( $C(O)CH_3$ ); IR  $\nu$  (film,  $cm^{-1}$ ) 3089 (NH), 2112 ( $N_3$ ), 1710 (C=O), 1670 (NH-C=O); ESIHRMS  $m/z = 514.1348$   $[M+Na]^+$ .  $C_{21}H_{22}N_5O_8FNa$  requires 514.1350.

**2,3-Di-*O*-acetyl-4-azido-6-*O*-benzyl-1-*N*-(4-*N*-benzoyl-5-methyl-cytosine)- $\beta$ -D-glucopyranoside 24.** The General Procedure was followed using **8** (45 mg, 0.092 mmol), **12** (34 mg, 0.148 mmol), BSA (90  $\mu$ L, 0.37 mmol), TMSOTf (20  $\mu$ L, 0.11 mmol), 4 Å molecular sieves (50 mg) in dry MeCN (0.9 mL). The residue was purified by preparative TLC (Heptane/EtOAc 1:1) to afford product **24** (36 mg, 66%) as a yellow powder.  $[\alpha]_D^{25} - 12.7$  ( $c = 1.2$ ,  $CHCl_3$ );  $^1H$  NMR (300 MHz,  $CDCl_3$ )  $\delta$  8.33-8.25 (m, 2H,  $H_{Ar}$ ), 7.57-7.26 (m, 9H,  $H_{Ar}$ ), 5.82 (d, 1H,  $J_{1,2} = 9.5$  Hz,  $H1$ ), 5.30 (dd, 1H,  $J_{3,2} = 9.5$  Hz,  $J_{3,4} = 10.0$  Hz,  $H3$ ), 5.10 (t, 1H,  $J_{2,1} = J_{2,3} = 9.5$  Hz,  $H2$ ), 4.60 (d, 1H,  $J_{H,H} = 12.0$  Hz,  $CH_2Ph$ ), 4.53 (d, 1H,  $J_{H,H} = 12.0$  Hz,  $CH_2Ph$ ), 3.95 (t, 1H,  $J_{4,3} = J_{4,5} = 10.0$  Hz,  $H4$ ), 3.81-3.68 (m, 2H,  $H6$ ,  $H6'$ ), 3.50 (ddd, 1H,  $J_{5,4} = 10.0$  Hz,  $J_{5,6} = 4.5$  Hz,  $J_{5,6'} = 2.0$  Hz,  $H5$ ), 2.10 (s, 3H,  $CH_3$ ), 2.09 (s, 3H,  $COCH_3$ ), 1.96 (s, 3H,  $COCH_3$ );  $^{13}C$  NMR (75 MHz,  $CDCl_3$ )  $\delta$  180.0 (C=O), 170.0 (C=O), 169.7 (C=O), 159.2 ( $Cq_{Ar}$ ), 148.2 ( $Cq_{Ar}$ ), 137.6 ( $Cq_{Ar}$ ), 137.0 ( $Cq_{Ar}$ ), 135.9 ( $CH_{Ar}$ ), 132.9 ( $CH_{Ar}$ ), 130.2 ( $CH_{Ar}$ ), 128.7 ( $CH_{Ar}$ ), 128.4 ( $CH_{Ar}$ ), 128.2 ( $CH_{Ar}$ ), 128.0 ( $CH_{Ar}$ ), 113.1 ( $Cq_{Ar}$ ), 80.7 (C1), 77.0 (C5), 73.8 ( $CH_2Ph$ ), 73.7 (C3), 69.9 (C2), 68.2 (C6), 59.6 (C4), 20.8 ( $C(O)CH_3$ ), 20.6 ( $C(O)CH_3$ ), 13.9 ( $CH_3$ ); IR  $\nu$  (film,  $cm^{-1}$ ) 2109 ( $N_3$ ), 1753 (C=O), 1709 (C=O) 1656 (NH-C=O); ESIHRMS  $m/z = 591.2208$   $[M+H]^+$ .  $C_{29}H_{31}N_6O_8$  requires 591.2203.

**2,3-Di-*O*-acetyl-4-azido-6-*O*-benzyl-1-*N*-(4-*N*-benzoyl-5-fluoro-cytosine)- $\beta$ -D-glucopyranoside 25.** The General Procedure was followed using **8** (1.49 g, 3.05 mmol), **13** (1.14 g, 4.89 mmol), BSA (2.27 mL, 9.16 mmol), TMSOTf (0.66 mL, 3.66 mmol) in dry MeCN (30 mL). The residue was purified by preparative HPLC, gradient from 30 to 100% MeCN in 15 min, to afford product **25** (918 mg, 1.54 mmol, 50%) as a yellow powder.  $[\alpha]_D^{20} + 22.9$  ( $c = 0.84$ ,  $CHCl_3$ );  $^1H$  NMR (300 MHz,  $CDCl_3$ )  $\delta$  8.29 (d, 2H,  $J_{H_{Ar},H_{Ar}} = 7.0$  Hz,  $H_{Ar}$ ), 7.57-7.43 (m, 4H,  $H_{Ar}$ ), 7.42-7.30 (m, 5H,  $H_{Ar}$ ), 5.79 (d, 1H,  $J_{1,2} = 9.0$  Hz,  $H1$ ), 5.32 (t, 1H,  $J_{3,2} = J_{3,4} = 9.5$  Hz,  $H3$ ), 5.00 (t, 1H,  $J_{2,3} = J_{2,1} = 9.5$  Hz,  $H2$ ), 4.61 (d, 1H,  $J_{H,H} = 12.0$  Hz,  $CH_2Ph$ ), 4.56 (d, 1H,  $J_{H,H} = 12.0$  Hz,  $CH_2Ph$ ), 3.94 (t, 1H,  $J_{4,3} = J_{4,5} = 10.0$  Hz,  $H4$ ), 3.81-3.71 (m, 2H,  $H6$ ,  $H6'$ ), 3.59 (d, 1H,  $J_{5,4} = 10.0$  Hz,  $H5$ ), 2.12 (s, 3H,  $CH_3$ ), 2.00 (s, 3H,  $CH_3$ );  $^{13}C$  NMR (75 MHz,  $CDCl_3$ )  $\delta$  170.1 (C=O), 169.7 (C=O), 152.2 ( $Cq_{Ar}$ ), 147.0 ( $Cq_{Ar}$ ), 141.5 ( $Cq_{Ar}$ ), 139.5 ( $Cq_{Ar}$ ), 137.5 ( $Cq_{Ar}$ ), 133.5 ( $CH_{Ar}$ ), 130.4 ( $CH_{Ar}$ ), 128.8 ( $CH_{Ar}$ ), 128.6 ( $CH_{Ar}$ ), 128.3 ( $CH_{Ar}$ ), 128.1 ( $CH_{Ar}$ ), 81.1 (C1), 77.1 (C5), 73.9 ( $CH_2Ph$ ), 73.3 (C3), 70.1 (C2), 68.1 (C6), 59.5 (C4), 20.8 ( $C(O)CH_3$ ), 20.6 ( $C(O)CH_3$ ); IR  $\nu$  (film,  $cm^{-1}$ ) 3089 (=C-H), 2111 ( $N_3$ ), 1753 (C=O), 1672 (NH-C=O); ESIHRMS  $m/z = 595.1951$   $[M+H]^+$ .  $C_{28}H_{28}N_6O_8F$  requires 595.1953.

**2,3-Di-*O*-acetyl-4-azido-6-*O*-benzyl-1-*N*-uracil- $\beta$ -D-glucopyranoside 26.** The General Procedure was followed using **8** (400 mg, 0.82 mmol), **14** (147 mg, 1.31 mmol), BSA (0.80 mL, 3.28 mmol), TMSOTf (0.18 mL, 0.98 mmol) in dry MeCN (8.2 mL). The residue was purified by flash chromatography (Heptane/EtOAc 90:10 to 50:50) to afford product **26** (314 mg, 0.66 mmol, 81%) as a yellow powder.  $[\alpha]_D^{25} + 20.6$  ( $c = 1.0$ ,  $CHCl_3$ );  $^1H$  NMR (300 MHz,  $CDCl_3$ )  $\delta$  8.78 (bs, 1H, NH), 7.43-7.29 (m, 6H,  $H_{Ar}$ ), 5.81 (d, 1H,  $J_{1,2} = 9.0$  Hz,  $H1$ ), 5.80 (d, 1H,  $J_{H_{Ar},H_{Ar}} = 8.0$  Hz,  $H_{Ar}$ ), 5.33 (t, 1H,  $J_{3,2} = J_{3,4} = 9.5$  Hz,  $H3$ ), 5.07 (dd, 1H,  $J_{2,1} = 9.0$  Hz,  $J_{2,3} = 9.5$  Hz,  $H2$ ), 4.62 (d, 1H,  $J_{H,H} = 12.0$  Hz,  $CH_2Ph$ ), 4.55 (d, 1H,  $J_{H,H} = 12.0$  Hz,  $CH_2Ph$ ), 3.94 (dd, 1H,  $J_{4,3} = 9.5$  Hz,  $J_{4,5} = 10.0$  Hz,  $H4$ ), 3.82-3.70 (m, 2H,  $H6$ ,  $H6'$ ), 3.61 (ddd, 1H,  $J_{5,4} = 10.0$  Hz,  $J_{5,6} = 3.0$  Hz,  $J_{5,6'} = 2.0$  Hz,  $H5$ ), 2.13 (s, 3H,  $CH_3$ ), 1.99 (s, 3H,  $CH_3$ );  $^{13}C$  NMR (75 MHz,  $CDCl_3$ )  $\delta$  169.9 (C=O), 169.7 (C=O), 162.5 ( $Cq_{Ar}$ ), 150.3 ( $Cq_{Ar}$ ), 139.4 ( $CH_{Ar}$ ), 137.5 ( $Cq_{Ar}$ ), 128.7 ( $CH_{Ar}$ ), 128.3 ( $CH_{Ar}$ ), 128.0 ( $CH_{Ar}$ ), 103.8 ( $CH_{Ar}$ ), 80.6 (C1), 77.0 (C5), 73.9 ( $CH_2Ph$ ), 73.5 (C3), 69.8 (C2), 68.2 (C6), 59.6 (C4), 20.8 ( $CH_3$ ), 20.6 ( $CH_3$ ); IR  $\nu$  (film,  $cm^{-1}$ ) 2109 ( $N_3$ ), 1752 (C=O), 1688 (NH-C=O); ESIHRMS  $m/z = 474.1626$   $[M+H]^+$ .  $C_{21}H_{24}N_5O_8$  requires 474.1625.

**Boc-sarcosinyl-*O*-tert-butyl-L-serine methyl ester 29-L.** To a stirred solution of *O*-tert-butyl-L-serine methyl ester hydrochloride (250 mg, 1.18 mmol, 1 eq.) and Boc-sarcosine (290 mg, 1.55 mmol, 1.3 eq.) in dry  $CH_2Cl_2$  (10 mL) were added 4Å molecular sieves (335 mg), hydroxybenzotriazole (240 mg, 1.77 mmol, 1.5 eq.) and 1-ethyl-3-(3-dimethylaminopropyl)carbodiimide (453 mg, 0.47 mmol, 2 eq.). The resulting mixture was cooled to 0 °C and  $Et_3N$  (0.5 mL, 2.36 mmol, 3 eq.) was added. After being stirred overnight at room temperature, the mixture was diluted with aqueous saturated  $NaHCO_3$  (6 mL). Aqueous phase was then extracted with EtOAc (3 x 5 mL). Organic layers were combined, dried over  $Na_2SO_4$ , filtered and concentrated under vacuum. The residue was purified by flash chromatography on silica gel (Heptane/EtOAc 50:50 to 30:70) to afford product **29-L** (400 g, 1.16 mmol, 98%) as a colorless oil.  $[\alpha]_D^{25} + 32.9$  ( $c = 0.82$ ,  $CHCl_3$ ).

**Boc-sarcosinyl-*O*-tert-butyl-L-serine 30-L.** To a stirred solution of **29-L** (320 mg, 0.92 mmol, 1 eq.) in THF/ $H_2O$  mixture (7.7 mL/1.5 mL 5:1) was added lithium hydroxide (29 mg, 1.20 mmol, 1.3 eq.). The resulting mixture was stirred for 1 h at room temperature and then concentrated under vacuum until THF was evaporated. HCl 1 N was then added until pH 2. The aqueous layer was extracted with EtOAc (3 x 10 mL). The organic layers were



combined, dried over Na<sub>2</sub>SO<sub>4</sub> and concentrated under vacuum to afford the clean product **30-L** (305 mg, 0.92 mmol, quantitative). The product is used without further purification. [ $\alpha$ ]<sub>D</sub><sup>25</sup> + 27.3 (*c* = 1.0, CHCl<sub>3</sub>).

**Peptidonucleoside 31-L.** The **solution 1** was prepared with Na (10 mg) in dry MeOH (2 mL, *C* = 0.22 M). To a stirred solution of the protected nucleoside **27** (503 mg, 0.96 mmol) in dry MeOH (16 mL) was added the **solution 1** (0.88 mL, 20 mol%). The resulting mixture was stirred at room temperature for 1 h and then neutralized with Dowex® H<sup>+</sup>, filtered on celite and concentrated under reduce pressure to afford clean product without further purification. The obtained product (355 mg) was then hydrogenolysed at atmospheric pressure in the presence of Pd(OH)<sub>2</sub>-C (40%w/w, 142 mg) in MeOH (8.9 mL) for 12 h. The resulting mixture was then filtered on celite® and concentrated under reduced pressure to afford the clean corresponding amine (318 mg). To a stirred solution of the latter (150 mg, 0.40 mmol) in DMF (6 mL) was added the dipeptide (174 mg, 0.52 mmol, 1.3 eq.) and DIPEA (0.28 mL, 1.61 mmol, 4 eq.). After 1 min, HATU (184 mg, 0.48 mmol, 1.5 eq.) was added and the resulting mixture was stirred at room temperature for 18 h. Solvent was removed and the crude product was purified by flash chromatography on silica gel (EtOAc/EtOH 99:1 to 92:8) to afford product **31-L** (158 mg, 0.23 mmol, 57%) as a yellow powder. [ $\alpha$ ]<sub>D</sub><sup>20</sup> - 99.0 (*c* = 0.34, H<sub>2</sub>O/MeOH 1:1); <sup>1</sup>H NMR (500 MHz, CD<sub>3</sub>OD)<sup>10</sup>  $\delta$  8.15 (d, 1H, *J*<sub>HAr,Har</sub> = 7.5 Hz, *H*<sub>Ar</sub>), 7.37 (d, 1H, *J*<sub>HAr,Har</sub> = 7.5 Hz, *H*<sub>Ar</sub>), 5.81 (d, 1H, *J*<sub>1,2</sub> = 9.0 Hz, *H*<sub>1</sub>), 4.60-4.49 (m, 1H, *H*<sub>7</sub>), 4.10-3.97 (m, 2H, *H*<sub>9</sub>), 3.95 (t, 1H, *J*<sub>4,3</sub> = *J*<sub>4,5</sub> = 10.0 Hz, *H*<sub>4</sub>), 3.87-3.71 (m, 2H, *H*<sub>3</sub>, *H*<sub>6</sub>), 3.71-3.58 (m, 5H, *H*<sub>2</sub>, *H*<sub>5</sub>, *H*<sub>6'</sub>, *H*<sub>8</sub>), 3.03-2.91 (bs, 3H, NCH<sub>3</sub>), 1.58 (s, 9H, CO<sub>2</sub>C(CH<sub>3</sub>)<sub>3</sub>), 1.55-1.47 (m, 9H, OC(CH<sub>3</sub>)<sub>3</sub>), 1.25 (s, 9H, CO<sub>2</sub>C(CH<sub>3</sub>)<sub>3</sub>); <sup>13</sup>C NMR (75 MHz, CD<sub>3</sub>OD)<sup>11</sup>  $\delta$  173.4 (C=O), 171.9 (C=O), 165.3 (Cq), 158.6 (Cq), 153.6 (C=O), 146.5 (CH<sub>Ar</sub>), 97.7 (CH<sub>Ar</sub>), 85.3 (C1), 83.4 (C(CH<sub>3</sub>)<sub>3</sub>), 81.8 (C(CH<sub>3</sub>)<sub>3</sub>), 80.2 (C5), 75.8 (C3), 75.0 (C(CH<sub>3</sub>)<sub>3</sub>), 74.5 (C2), 62.8 (C6), 58.6 (C8), 55.7 (C7), 53.2 (C4), 52.9 (C9), 36.4 (NCH<sub>3</sub>), 28.8 (C(CH<sub>3</sub>)<sub>3</sub>), 28.5 (C(CH<sub>3</sub>)<sub>3</sub>), 27.8 (C(CH<sub>3</sub>)<sub>3</sub>); IR  $\nu$  (film, cm<sup>-1</sup>) 3310 (O-H), 3282 (N-H), 2976 (CH<sub>3</sub>), 2933 (CH<sub>2</sub>), 1744 (C=O), 1653 (NH-C=O); ESIHRMS *m/z* = 687.3566 [M+H]<sup>+</sup>. C<sub>30</sub>H<sub>51</sub>N<sub>6</sub>O<sub>12</sub> requires 687.3565.

**Analogue 32-L.** To a stirred solution of **31-L** (90 mg, 0.131 mmol, 1 eq.) in CH<sub>2</sub>Cl<sub>2</sub>/MeOH (2:1 v/v, 1.3 mL) was added a solution of 4M HCl in dioxane (0.23 mL, 0.92 mmol, 7 eq.). The resulting mixture was stirred at room temperature for 2 days and then diluted with H<sub>2</sub>O and then neutralized with DOWEX® MONOSPHERE® 550A (OH) anion exchange resin. The mixture was filtered on celite and then concentrated under vacuum. The crude product was purified by preparative TLC (H<sub>2</sub>O/EtOH/EtOAc 4:4:2, pH 9) to afford clean product **32-L** as a white powder (10.3 mg, 0.024 mmol, 28%). [ $\alpha$ ]<sub>D</sub><sup>25</sup> + 278.3 (*c* = 1.0, H<sub>2</sub>O); <sup>1</sup>H NMR (500 MHz, D<sub>2</sub>O)  $\delta$  7.80 (d, 1H, *J*<sub>HAr,Har</sub> = 7.5 Hz, *H*<sub>Ar</sub>), 6.14 (d, 1H, *J*<sub>HAr,Har</sub> = 7.5 Hz, *H*<sub>Ar</sub>), 5.71 (d, 1H, *J*<sub>1,2</sub> = 9.0 Hz, *H*<sub>1</sub>), 4.52 (t, 1H, *J*<sub>7,8</sub> = *J*<sub>7,8'</sub> = 5.5 Hz, *H*<sub>7</sub>), 3.99 (t, 1H, *J*<sub>4,3</sub> = *J*<sub>4,5</sub> = 10.0 Hz, *H*<sub>4</sub>), 3.92 (d, 2H, *J*<sub>8,7</sub> = 5.5 Hz, *H*<sub>8</sub>), 3.85 (dd, 1H, *J*<sub>3,2</sub> = 9.0 Hz and *J*<sub>3,4</sub> = 10.0 Hz, *H*<sub>3</sub>), 3.82 (t, 1H, *J*<sub>2,3</sub> = *J*<sub>2,1</sub> = 9.0 Hz, *H*<sub>2</sub>), 3.80-3.70 (m, 2H, *H*<sub>5</sub>, *H*<sub>6</sub>), 3.66-3.60 (m, 3H, *H*<sub>6</sub>, *H*<sub>9</sub>), 2.54 (s, 3H, NCH<sub>3</sub>); <sup>13</sup>C NMR (75 MHz, D<sub>2</sub>O)  $\delta$  172.2 (C=O), 171.1 (C=O), 166.1 (C=O), 158.0 (Cq<sub>Ar</sub>), 141.8 (CH<sub>Ar</sub>), 97.1 (CH<sub>Ar</sub>), 83.1 (C1), 77.5 (C5), 73.8 (C3), 71.7 (C2), 61.2 (C8), 60.7 (C6), 55.8 (C7), 51.4 (C4), 51.3 (C9), 33.8 (NCH<sub>3</sub>); IR  $\nu$  (film, cm<sup>-1</sup>) 3310 (O-H), 3282 (N-H), 2976 (CH<sub>3</sub>), 2933 (CH<sub>2</sub>), 1744 (C=O), 1653 (NH-C=O); ESIHRMS *m/z* = 431.1890 [M+H]<sup>+</sup>. C<sub>16</sub>H<sub>27</sub>N<sub>6</sub>O<sub>8</sub> requires 431.1901.

**Peptidonucleoside 33.** The same Procedure as described for **31-D** was followed using **16** (315 mg, 0.72 mmol), **solution 1** (0.65 mL, *C* = 0.44 M, 40 mol%) in MeOH (10 mL) to obtain the deacetylated compound (227 mg). The obtained product was hydrogenolysed with Pd(OH)<sub>2</sub>-C (68 mg) in MeOH (3.8 mL) to give the corresponding amine (110 mg, 0.38 mmol). Then, the peptide coupling was carried out with the amine (110 mg), **30-D** (195 mg, 0.59 mmol), DIPEA (0.3 mL, 1.8 mmol) and HATU (206 mg, 0.54 mmol) in DMF (7.5 mL). The residue was purified by flash chromatography on silica gel (EtOAc/EtOH 99:1 to 92:8) to afford clean product **33** (204 mg, 0.34 mmol, 47%) as a yellow powder. [ $\alpha$ ]<sub>D</sub><sup>25</sup> + 24.4 (*c* = 0.55, MeOH). <sup>1</sup>H NMR (500 MHz, CD<sub>3</sub>OD)<sup>10</sup>  $\delta$  7.60 (s, 1H, *H*<sub>Ar</sub>), 5.55 (d, 1H, *J*<sub>1,2</sub> = 9.0 Hz, *H*<sub>1</sub>), 4.45 (t, 1H, *J*<sub>7,8</sub> = *J*<sub>7,8'</sub> = 5.0 Hz, *H*<sub>7</sub>), 4.01-3.91 (m, 2H, *H*<sub>9</sub>), 3.89-3.55 (m, 7H, *H*<sub>2</sub>, *H*<sub>3</sub>, *H*<sub>4</sub>, *H*<sub>5</sub>, *H*<sub>6</sub>, *H*<sub>8</sub>), 2.99-2.88 (m, 3H, NCH<sub>3</sub>), 1.91 (s, 3H, CH<sub>3</sub>), 1.57-1.35 (m, 9H, OC(CH<sub>3</sub>)<sub>3</sub>), 1.21 (s, 9H, CO<sub>2</sub>C(CH<sub>3</sub>)<sub>3</sub>); <sup>13</sup>C NMR (75 MHz, CD<sub>3</sub>OD)<sup>11</sup>  $\delta$  172.0 (C=O), 170.6 (C=O), 170.5 (C=O), 164.7 (C=O), 151.5 (C=O), 136.7 (CH<sub>Ar</sub>), 110.5 (Cq<sub>Ar</sub>), 85.5 (C1), 80.3 (C(CH<sub>3</sub>)<sub>3</sub>), 78.3 (CH), 74.0 (CH), 73.5 (C(CH<sub>3</sub>)<sub>3</sub>), 71.9 (CH), 61.4 (CH<sub>2</sub>), 54.3 (C7), 51.7 (CH), 51.5 (CH<sub>2</sub>), 35.1 (NCH<sub>3</sub>), 27.2 (C(CH<sub>3</sub>)<sub>3</sub>), 26.2 (C(CH<sub>3</sub>)<sub>3</sub>), 10.8 (CH<sub>3</sub>); IR  $\nu$  (film, cm<sup>-1</sup>) 3295 (N-H), 2974 (CH), 1654 (NH-C=O); ESIHRMS *m/z* = 602.4783 [M+H]<sup>+</sup>. C<sub>26</sub>H<sub>44</sub>N<sub>5</sub>O<sub>11</sub> requires 602.3037.

**Peptidonucleoside 35.** To a stirred solution of **33** (30 mg, 0.05 mmol, 1 eq.) in CH<sub>2</sub>Cl<sub>2</sub>/MeOH (2:1 v/v, 0.6 mL) was added a solution of 4M HCl in dioxane (0.3 mL, 1.2 mmol, 25 eq.). The resulting mixture was stirred at room

<sup>10</sup> Peaks in <sup>1</sup>H-NMR spectrum broad and split due to the presence of *N*-Boc rotamers.

<sup>11</sup> Peaks in <sup>13</sup>C-NMR spectrum broad and split due to the presence of *N*-Boc rotamers.

temperature for 2 days and then diluted with H<sub>2</sub>O and then neutralized with NEt<sub>3</sub> (0.2 mL). The mixture was concentrated under vacuum and the crude product was purified by preparative TLC (H<sub>2</sub>O/EtOH/EtOAc 2:2:1, with 1% of NH<sub>4</sub>OH) to afford clean product **35** as a white powder (10 mg, 0.022 mmol, 45%); [ $\alpha$ ]<sub>D</sub><sup>20</sup> + 8.9 (*c* = 1.0, MeOH); <sup>1</sup>H NMR (300 MHz, D<sub>2</sub>O)  $\delta$  7.62 (s, 1H, H<sub>Ar</sub>), 5.61-5.54 (m, 1H, H<sub>1</sub>), 4.44 (t, 1H, *J*<sub>7,8</sub> = *J*<sub>7,8'</sub> = 5.5 Hz, H<sub>7</sub>), 3.92-3.79 (m, 4H, 1 x CH and CH<sub>2</sub>), 3.79-3.64 (m, 5H, 3 x CH and CH<sub>2</sub>), 3.63-3.54 (m, 1H, CH<sub>2</sub>), 2.67 (s, 3H, NCH<sub>3</sub>), 1.86 (s, 3H, CH<sub>3</sub>); <sup>13</sup>C NMR (75 MHz, D<sub>2</sub>O)  $\delta$  172.1 (C=O), 167.8 (C=O), 166.3 (C=O), 152.2 (C=O), 137.3 (CH<sub>Ar</sub>), 111.1 (C<sub>qAr</sub>), 82.5 (C<sub>1</sub>), 77.5 (CH), 73.6 (CH), 71.6 (CH), 61.1 (CH<sub>2</sub>), 60.7 (CH<sub>2</sub>), 56.0 (C<sub>7</sub>), 51.4 (CH), 49.4 (CH<sub>2</sub>), 33.1 (NCH<sub>3</sub>), 11.4 (CH<sub>3</sub>); IR  $\nu$  (film, cm<sup>-1</sup>) 3288 (N-H), 2923 (CH), 2854 (CH), 1664 (NH-C=O); ESIHRMS *m/z* = 446.1867 [M+H]<sup>+</sup>. C<sub>18</sub>H<sub>27</sub>N<sub>5</sub>O<sub>9</sub> requires 446.1887.

**Peptidonucleoside 36.** The same Procedure as described for **31-D** was followed using **17** (194 mg, 0.72 mmol), **solution 1** (1.2 mL, C=0.22 M, 40 mol% of Na) in MeOH (7 mL). The obtained product (125 mg) was hydrogenolysed with Pd(OH)<sub>2</sub>-C (50 mg) in MeOH (4 mL) to give the corresponding amine (107 mg). Then, the peptide coupling was carried out using the amine (107 mg, 0.37 mmol), **30-D** (158 mg, 0.48 mmol), DIPEA (0.25 mL, 1.48 mmol) and HATU (167 mg, 0.44 mmol) in DMF (6 mL). The residue was purified by chromatography on silica gel (DCM/MeOH 96:4 to 92:8) to afford **34** (124 mg, 0.20 mmol, 56% over three steps). ESIHRMS *m/z* = 606.2786 [M+H]<sup>+</sup>. C<sub>25</sub>H<sub>41</sub>N<sub>5</sub>O<sub>11</sub>F requires 606.2787. As **34** was not very clean, it was not fully characterized and then engaged in the next step. To a stirred solution of **34** (124 mg, 0.2 mmol, 1 eq.) in CH<sub>2</sub>Cl<sub>2</sub>/MeOH (2:1 v/v, 2.3 mL) was added a solution of 4M HCl in dioxane (0.35 mL, 1.4 mmol, 6.8 eq.). The resulting mixture was stirred at room temperature for 3 days and then diluted with H<sub>2</sub>O and then neutralized with NEt<sub>3</sub> (0.2 mL). The mixture was concentrated under vacuum and the crude product was purified by preparative TLC (H<sub>2</sub>O/EtOH/EtOAc 3:1:1, with 1% of NH<sub>4</sub>OH) to afford clean product **36** as a white powder (54 mg, 0.013 mmol, 63%). [ $\alpha$ ]<sub>D</sub><sup>20</sup> - 73.3 (*c* = 0.15, H<sub>2</sub>O/MeOH: 1:1); <sup>1</sup>H NMR (300 MHz, D<sub>2</sub>O)  $\delta$  7.94 (d, 1H, *J*<sub>HAr,F</sub> = 6.0 Hz, H<sub>Ar</sub>), 5.59 (d, 1H, *J*<sub>1,2</sub> = 9.0 Hz, H<sub>1</sub>), 4.51-4.38 (m, 1H, H<sub>7</sub>), 3.99-3.46 (m, 10H, H<sub>2</sub>, H<sub>3</sub>, H<sub>4</sub>, H<sub>5</sub>, H<sub>6</sub>, H<sub>8</sub>, H<sub>9</sub>), 2.72 (s, 3H, NCH<sub>3</sub>), 2.72 (s, 9H, C(CH<sub>3</sub>)<sub>3</sub>); <sup>13</sup>C NMR (75 MHz, D<sub>2</sub>O)  $\delta$  181.4 (C=O), 172.3 (C=O), 166.7 (C=O), 161.2 (d, *J* = 23.6 Hz, CH<sub>Ar</sub>), 152.2 (CO), 125.3 (d, *J* = 23.6 Hz, C<sub>qAr</sub>), 125.2 (CH), 82.9 (C<sub>1</sub>), 77.5 (CH), 75.0 (C(CH<sub>3</sub>)<sub>3</sub>), 73.3 (CH), 71.7 (CH), 61.0 (CH<sub>2</sub>), 60.7 (CH<sub>2</sub>), 56.0 (C<sub>7</sub>), 51.3 (CH), 49.4 (CH<sub>2</sub>), 32.8 (NCH<sub>3</sub>), 26.4 (C(CH<sub>3</sub>)<sub>3</sub>); IR  $\nu$  (film, cm<sup>-1</sup>) 3288 (N-H), 2923 (CH), 2854 (CH), 1664 (NH-C=O); ESIHRMS *m/z* = 506.2249 [M+H]<sup>+</sup>. C<sub>20</sub>H<sub>33</sub>N<sub>5</sub>O<sub>9</sub>F requires 506.2262.

**tert-butyl (R)-(2-((1-(tert-butoxy)-3-hydroxypropan-2-yl)amino)-2-oxoethyl)(methyl)carbamate 37.** To a stirred solution of **29-D** (193 mg, 0.557 mmol, 1 eq.) in THF (2 mL) was added at 0 °C LiBH<sub>4</sub> (21 mg, 0.95 mmol, 1.7 eq.). The resulting mixture was stirred at room temperature for 4 h and then hydrolyzed with a saturated aqueous solution of NH<sub>4</sub>Cl (10 mL). Water (10 mL) was added and the aqueous phase was extracted with EtOAc (3 x 15 mL). The organic phase was dried with Na<sub>2</sub>SO<sub>4</sub>, filtered and concentrated under vacuum. The crude product was purified by flash chromatography on silica gel (Heptane/EtOAc 30:70 to 0:100) to afford product **37** (160 mg, 0.5 mmol, 90%) as a colorless oil. [ $\alpha$ ]<sub>D</sub><sup>20</sup> - 5.4 (*c* = 0.24, CHCl<sub>3</sub>); <sup>1</sup>H NMR (300 MHz, CDCl<sub>3</sub>)<sup>10</sup>  $\delta$  6.81-6.58 (bs, 1H, NH), 4.03-3.93 (m, 1H, CHN), 3.91-3.81 (m, 2H, COCH<sub>2</sub>N), 3.80 (dd, 1H, *J* = 11.5 and 3.5 Hz, CH<sub>2</sub>), 3.69-3.58 (m, 1H, CH<sub>2</sub>), 3.57-3.50 (m, 2H, CH<sub>2</sub>), 3.25-3.09 (m, 1H, OH), 2.91 (s, 3H, NCH<sub>3</sub>), 1.43 (s, 9H, C(CH<sub>3</sub>)<sub>3</sub>), 1.15 (s, 9H, C(CH<sub>3</sub>)<sub>3</sub>); <sup>13</sup>C NMR (75 MHz, CDCl<sub>3</sub>)<sup>11</sup>  $\delta$  169.5 (C=O), 80.7 (C(CH<sub>3</sub>)<sub>3</sub>), 73.8 (C(CH<sub>3</sub>)<sub>3</sub>), 64.4 (CH<sub>2</sub>), 63.0 (CH<sub>2</sub>), 53.1 (COCH<sub>2</sub>N), 50.5 (CHN), 35.6 (NCH<sub>3</sub>), 28.3 (C(CH<sub>3</sub>)<sub>3</sub>), 27.3 (C(CH<sub>3</sub>)<sub>3</sub>); IR  $\nu$  (film, cm<sup>-1</sup>) 3217 (N-H), 2974 (CH), 2875 (CH), 1662 (NH-C=O); ESIHRMS *m/z* = 419.2219 [M+H]<sup>+</sup>. C<sub>15</sub>H<sub>31</sub>N<sub>2</sub>O<sub>5</sub> requires 419.2233.

**tert-butyl (R)-(2-((1-(tert-butoxy)but-3-yn-2-yl)amino)-2-oxoethyl)(methyl)carbamate 38.** To a stirred solution of alcohol **37** (0.130 g, 0.408 mmol, 1.0 eq.) in CH<sub>2</sub>Cl<sub>2</sub> (8 mL) at 0 °C was added saturated aqueous NaHCO<sub>3</sub> (4 mL), KBr (49 mg, 0.408 mmol, 1.0 eq.) and TEMPO (3 mg, 0.02 mmol, 0.05 eq.). NaOCl (0.5 M, 1.6 mL, 2.0 eq.) was then added with a syringe pump over 30 min. Saturated aqueous Na<sub>2</sub>S<sub>2</sub>O<sub>3</sub> (4 mL) was added, the phases were separated and the aqueous layer was extracted with DCM (3 x 15 mL). The combined organic layers were dried over Na<sub>2</sub>SO<sub>4</sub>, filtered and concentrated under reduced pressure to afford the corresponding crude  $\alpha$ -amino aldehyde (95 mg) which was used directly in the next step. To the latter (90 mg, 0.284 mmol, 1 eq.) and dimethyl (1-diazo-2-oxopropyl)phosphonate (96 mg, 0.498 mmol, 1.75 eq.) in MeOH (2 mL) at 0 °C was added K<sub>2</sub>CO<sub>3</sub> (83 mg, 0.597 mmol, 2.1 eq.). The resulting mixture was stirred at 0 °C for 3 h and was hydrolyzed with a sat. aq. solution of NH<sub>4</sub>Cl (10 mL). Water (10 mL) was added and the aqueous phase was extracted with EtOAc (3 x 15 mL). The organic phase was dried with Na<sub>2</sub>SO<sub>4</sub>, filtered and concentrated under vacuum pressure. The crude product was purified by flash chromatography on silica gel (Heptane/EtOAc 70:30 to 50:50) to afford product **38** (51 mg, 0.163 mmol, 42% over the two steps) as a colorless oil. [ $\alpha$ ]<sub>D</sub><sup>20</sup> + 2.5 (*c* = 0.32, CHCl<sub>3</sub>); <sup>1</sup>H NMR (300 MHz, CDCl<sub>3</sub>)<sup>10</sup>  $\delta$  6.65-6.26 (bs, 1H, NH), 4.83-4.69 (m, 1H, CHN), 3.90-3.67 (m, 2H, COCH<sub>2</sub>N), 3.50-3.37 (m, 2H, CH<sub>2</sub>), 2.86 (s, 3H, CH<sub>3</sub>), 2.17 (d, 1H, *J* = 2.5 Hz, CH<sub>Alkyne</sub>), 1.41 (s, 9H, C(CH<sub>3</sub>)<sub>3</sub>), 1.09 s, 9H, (C(CH<sub>3</sub>)<sub>3</sub>); <sup>13</sup>C NMR (75 MHz, CDCl<sub>3</sub>)<sup>11</sup>  $\delta$  168.5 (C=O), 81.4 (C<sub>qAlkyne</sub>), 80.7 (C(CH<sub>3</sub>)<sub>3</sub>), 73.6 (C(CH<sub>3</sub>)<sub>3</sub>), 70.8 (CH<sub>Alkyne</sub>), 63.5 (CH<sub>2</sub>), 53.1 (CH<sub>2</sub>),

41.6 (COCH<sub>2</sub>N), 35.6 (NCH<sub>3</sub>), 28.3 (C(CH<sub>3</sub>)<sub>3</sub>), 27.4 (C(CH<sub>3</sub>)<sub>3</sub>); IR  $\nu$  (film, cm<sup>-1</sup>) 3310 (N-H), 2975 (CH), 2873 (CH), 1666 (NH-C=O); ESIHRMS  $m/z$  = 335.1947 [M+Na]<sup>+</sup>. C<sub>16</sub>H<sub>28</sub>N<sub>2</sub>O<sub>4</sub> requires 335.1947.

**Peptidonucleoside 39.** To a stirred solution of azid **18** (78 mg, 0.144 mmol, 1.0 eq.) and alkyne **38** (45 mg, 0.144 mmol, 1.0 eq.) in CH<sub>2</sub>Cl<sub>2</sub> (2 mL) at r.t. was added CuSO<sub>4</sub>•5H<sub>2</sub>O (4 mg, 0.014 mmol, 0.1 eq.) in water (1 mL) followed by sodium ascorbate (3 mg, 0.014 mmol, 0.1 eq.) in water (1 mL). After stirring for 18 h, water (10 mL) and EtOAc (15 mL) were added. The phases were separated and the aqueous layer was extracted with EtOAc (3 x 15 mL). The combined organic layers were dried over Na<sub>2</sub>SO<sub>4</sub>, filtered and concentrated under reduced pressure. The crude product was purified by flash chromatography on silica gel (Heptane/EtOAc 50:50 to 0:100) to afford product **39** (94 mg, 0.163 mmol, 76%) as a colorless oil.  $[\alpha]_D^{20}$  - 26.9 ( $c$  = 0.58, CHCl<sub>3</sub>); <sup>1</sup>H NMR (300 MHz, CDCl<sub>3</sub>)<sup>10</sup>  $\delta$  8.28 (d, 2H,  $J$  = 7.5 Hz, H<sub>Ar</sub>), 7.57 (s, 1H, H<sub>Triazole</sub>), 7.54-7.46 (m, 1H, H<sub>Ar</sub>), 7.42 (t, 2H,  $J$  = 7.5 Hz, H<sub>Ar</sub>), 7.27 (s, 1H, H<sub>Ar</sub>), 6.94-6.77 (bs, 1H, NH), 6.09 (d, 1H,  $J_{1,2}$  = 9.5 Hz, H1), 5.79 (t, 1H,  $J_{3,4}$  =  $J_{3,2}$  = 9.5 Hz, H3), 5.27 (t, 1H,  $J_{2,3}$  =  $J_{2,1}$  = 9.5 Hz, H2), 5.23-5.12 (m, 1H, CHN), 4.73 (t, 1H,  $J_{4,5}$  =  $J_{4,3}$  = 9.5 Hz, H4), 4.62-4.61 (m, 1H, H5), 4.08 (dd, 1H,  $J$  = 2.0 and 12.0 Hz, CH<sub>2</sub>), 3.94-3.73 (m, 4H, CH<sub>2</sub>), 3.62-3.49 (m, 1H, CH<sub>2</sub>), 2.92 (s, 3H, NCH<sub>3</sub>), 2.12 (s, 3H, CH<sub>3</sub>), 2.04 (s, 3H, COCH<sub>3</sub>), 1.97 (s, 3H, COCH<sub>3</sub>), 1.85 (s, 3H, COCH<sub>3</sub>), 1.45 (s, 9H, C(CH<sub>3</sub>)<sub>3</sub>), 1.09 (s, 9H, C(CH<sub>3</sub>)<sub>3</sub>); <sup>13</sup>C NMR (75 MHz, CDCl<sub>3</sub>)<sup>11</sup>  $\delta$  179.9 (C=O), 169.9 (C=O), 169.7 (C=O), 169.0 (C=O), 168.5 (C=O), 158.8 (C=O), 148.0 (Cq), 136.7 (Cq), 135.1 (CH<sub>Ar</sub>), 132.8 (CH<sub>Ar</sub>), 130.0 (CH<sub>Ar</sub>), 128.1 (CH<sub>Ar</sub>), 122.6 (CH<sub>Triazole</sub>), 113.2 (CH<sub>Ar</sub>), 80.6 (C1), 77.2 (Cq), 74.9 (C5), 73.5 (Cq), 72.2 (C3), 69.7 (C2), 62.8 (CH<sub>2</sub>), 61.8 (CH<sub>2</sub>), 59.9 (C4), 53.0 (CH<sub>2</sub>), 46.5 (CHN), 35.8 (NCH<sub>3</sub>), 28.3 (C(CH<sub>3</sub>)<sub>3</sub>), 27.4 (C(CH<sub>3</sub>)<sub>3</sub>), 20.6 (COCH<sub>3</sub>), 20.4 (COCH<sub>3</sub>), 20.1 (COCH<sub>3</sub>), 13.7 (CH<sub>3</sub>); IR  $\nu$  (film, cm<sup>-1</sup>) 2973 (CH), 2854 (CH), 1750 (CO), 1704 (CO), 1659 (NH-C=O); ESIHRMS  $m/z$  = 855.3889 [M+H]<sup>+</sup>. C<sub>40</sub>H<sub>55</sub>N<sub>8</sub>O<sub>13</sub> requires 855.13889.

**Peptidonucleoside 40.** The solution **1** was prepared with Na (20 mg) in dry MeOH (2 mL). To a stirred solution of the protected nucleoside **39** (70 mg, 0.028 mmol) in dry MeOH (0.2 mL) was added the solution **1** (0.4 mL, 1 eq.). The resulting mixture was stirred at room temperature for 5 h and a solution of 4M HCl in dioxane (0.6 mL, 2.4 mmol, 30 eq.) was added. The resulting mixture was stirred at room temperature for 8 h and neutralized with NEt<sub>3</sub> (0.35 mL). The mixture was concentrated under vacuum and the crude product was purified by preparative TLC (H<sub>2</sub>O/EtOH/EtOAc 1:2:2, with 1% of NH<sub>4</sub>OH) to afford product **40** as a white powder, which was washed several times with CHCl<sub>3</sub> (25 mg, 0.047 mmol, 58%).  $[\alpha]_D^{20}$  - 43.4 ( $c$  = 0.35, H<sub>2</sub>O/MeOH: 1/1); <sup>1</sup>H NMR (300 MHz, CD<sub>3</sub>OD)  $\delta$  8.15 (s, 1H, H<sub>Triazole</sub>), 7.91 (s, 1H, H<sub>Ar</sub>), 7.62-7.24 (bs, 1H, NH), 5.89 (d, 1H,  $J_{1,2}$  = 9.5 Hz, H1), 5.31 (t, 1H,  $J$  = 5.5 Hz, CHN), 4.74 (t, 1H,  $J_{3,4}$  =  $J_{3,2}$  = 9.5 Hz, H3), 5.34-4.24 (m, 2H, H4 and H5), 3.97-3.88 (m, 2H, CH<sub>2</sub>), 3.85 (t, 1H,  $J_{2,1}$  =  $J_{2,3}$  = 9.5 Hz, H2), 3.82-3.71 (m, 2H, CH<sub>2</sub>), 3.52 (dd, 1H,  $J$  = 1.5 and 12.0 Hz, H6), 3.52 (dd, 1H,  $J$  = 4.0 and 12.0 Hz, H6'), 2.78 (s, 3H, NCH<sub>3</sub>), 2.10 (s, 3H, CH<sub>3</sub>), 1.21 (s, 9H, C(CH<sub>3</sub>)<sub>3</sub>), 1.09 (C(CH<sub>3</sub>)<sub>3</sub>); <sup>13</sup>C NMR (75 MHz, CD<sub>3</sub>OD)  $\delta$  164.9 (C=O), 163.4 (C=O), 153.5 (Cq), 145.8 (Cq), 140.6 (CH<sub>Ar</sub>), 124.0 (CH<sub>Triazole</sub>), 100.7 (Cq), 83.7 (C1), 77.5 and 74.4 (C4 and C5), 73.4 (Cq), 72.4 (C2), 63.0 (CH<sub>2</sub>), 61.7 (C3), 60.0 (C6), 49.4 (CH<sub>2</sub>), 47.2 (CHN), 32.4 (NCH<sub>3</sub>), 26.3 (C(CH<sub>3</sub>)<sub>3</sub>), 11.7 (CH<sub>3</sub>); IR  $\nu$  (film, cm<sup>-1</sup>) 3056 (NH), 2921 (CH), 1666 (NH-C=O); ESIHRMS  $m/z$  = 525.2787 [M+H]<sup>+</sup>. C<sub>22</sub>H<sub>37</sub>N<sub>8</sub>O<sub>7</sub> requires 525.2785.

# $^1\text{H-NMR}$ and $^{13}\text{C-NMR}$ spectra

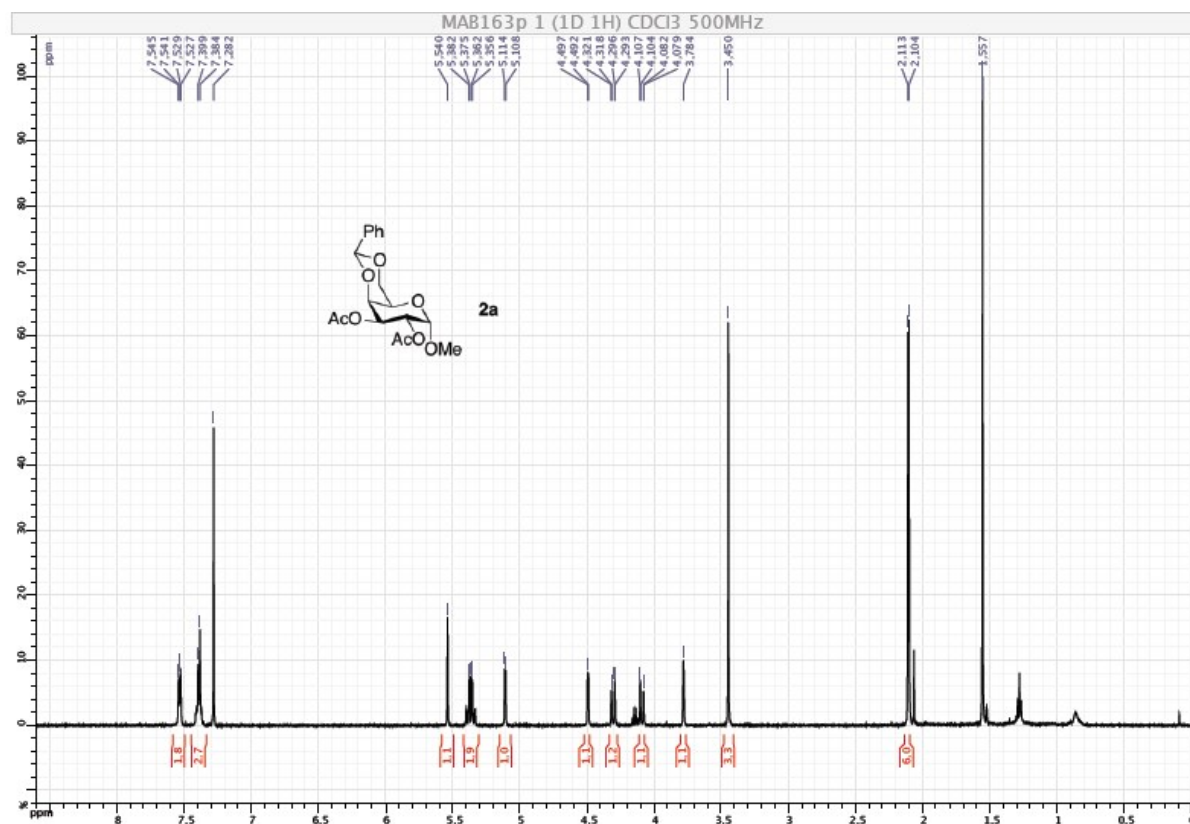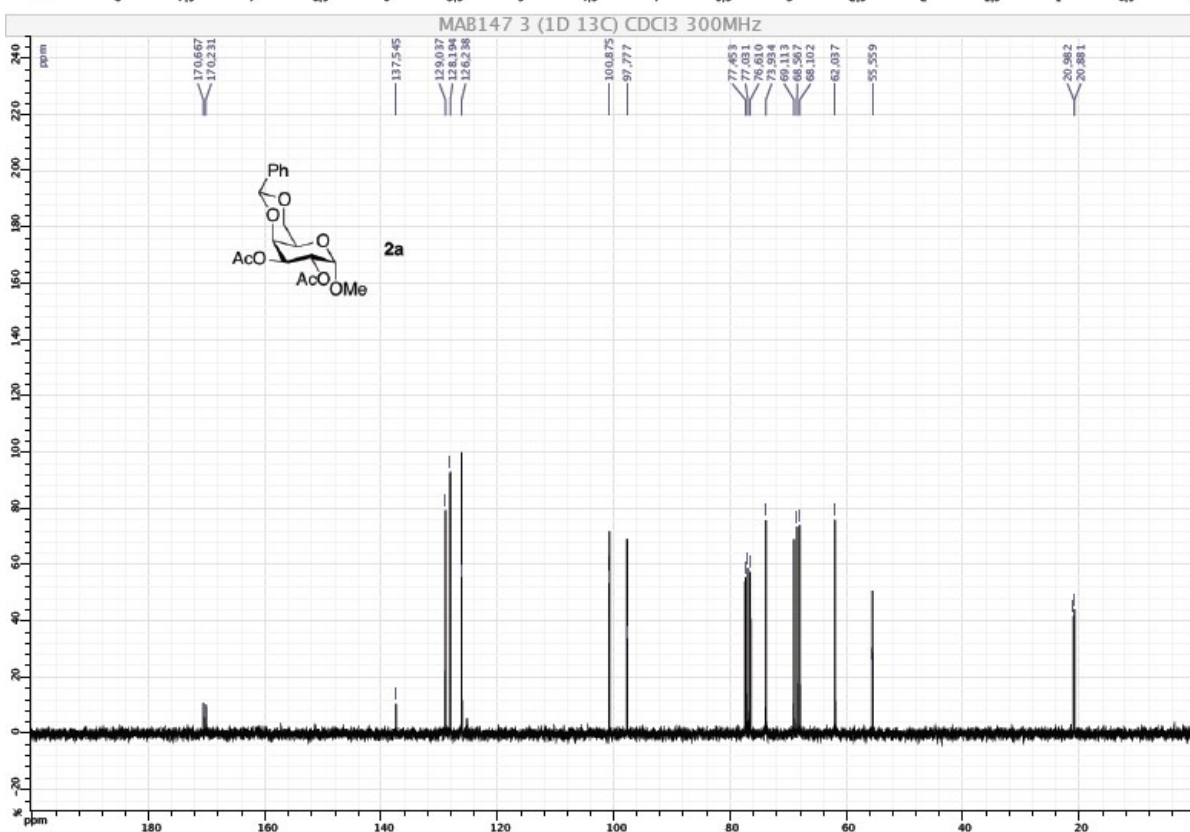

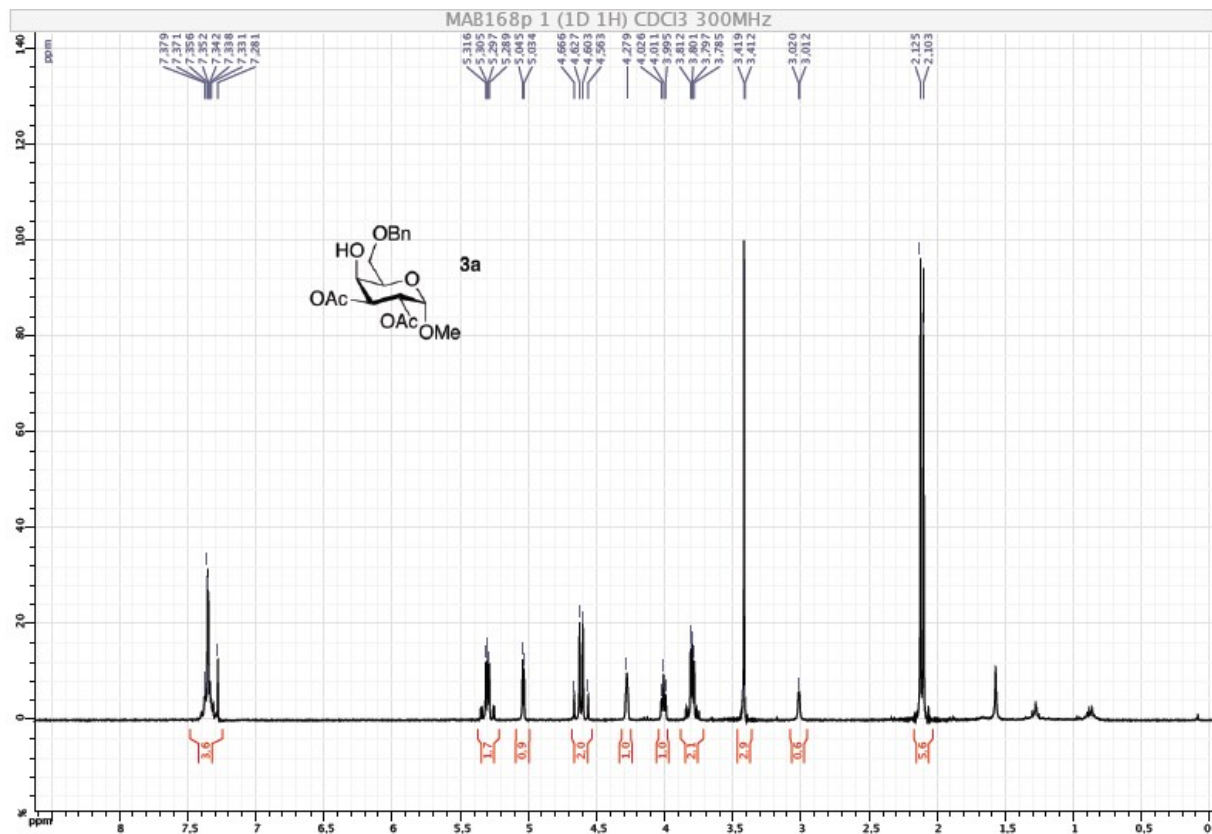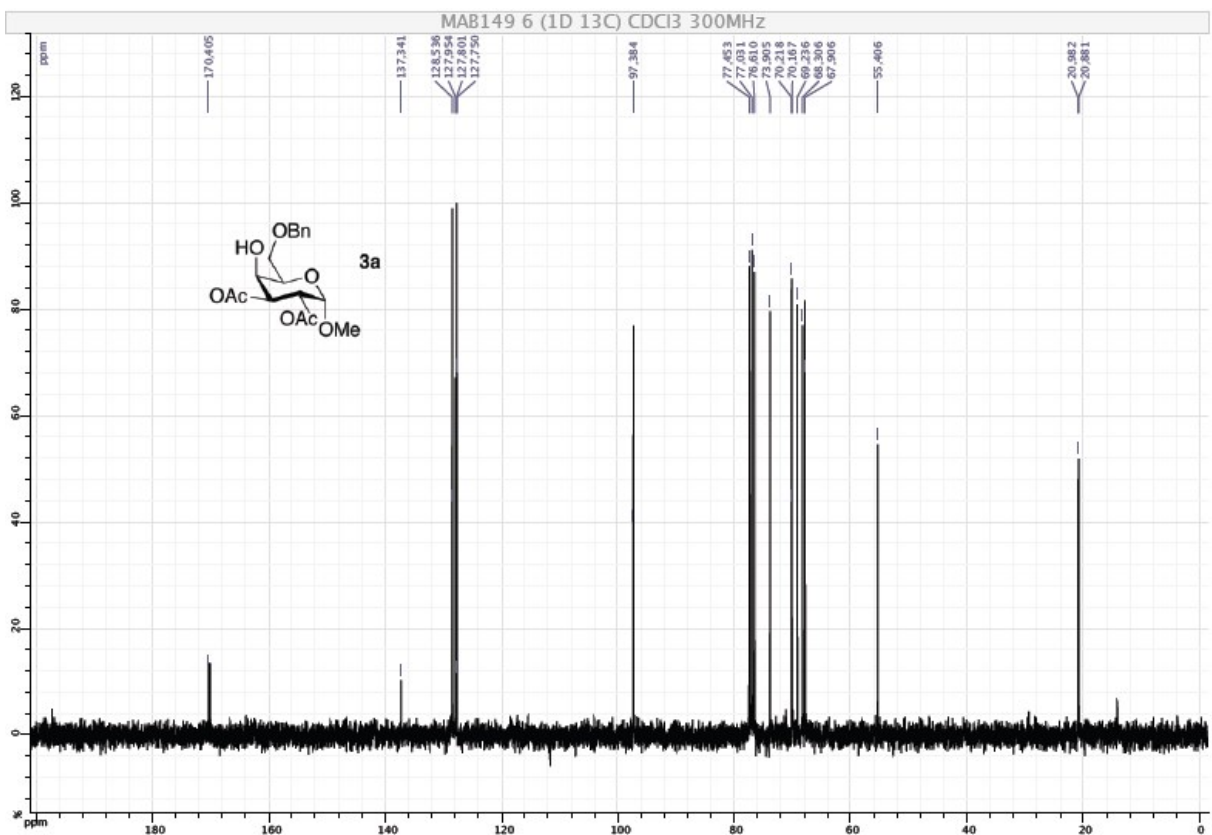

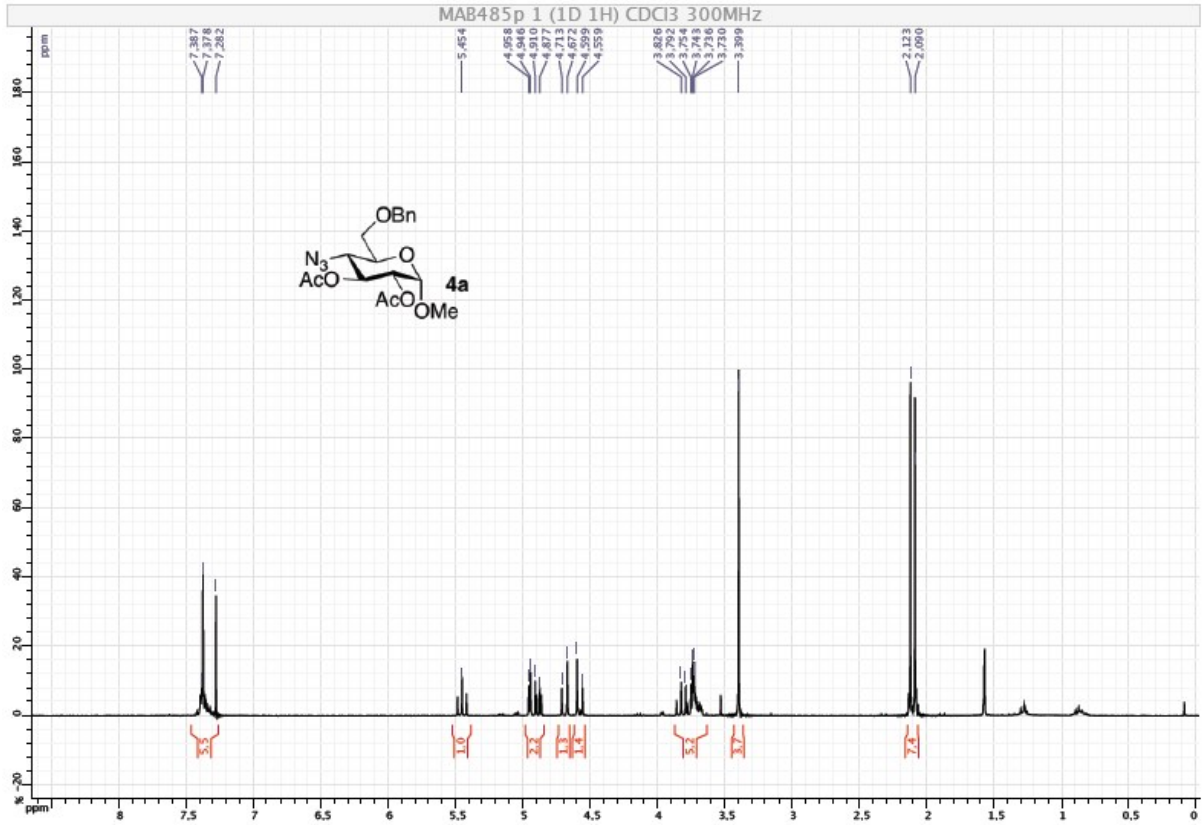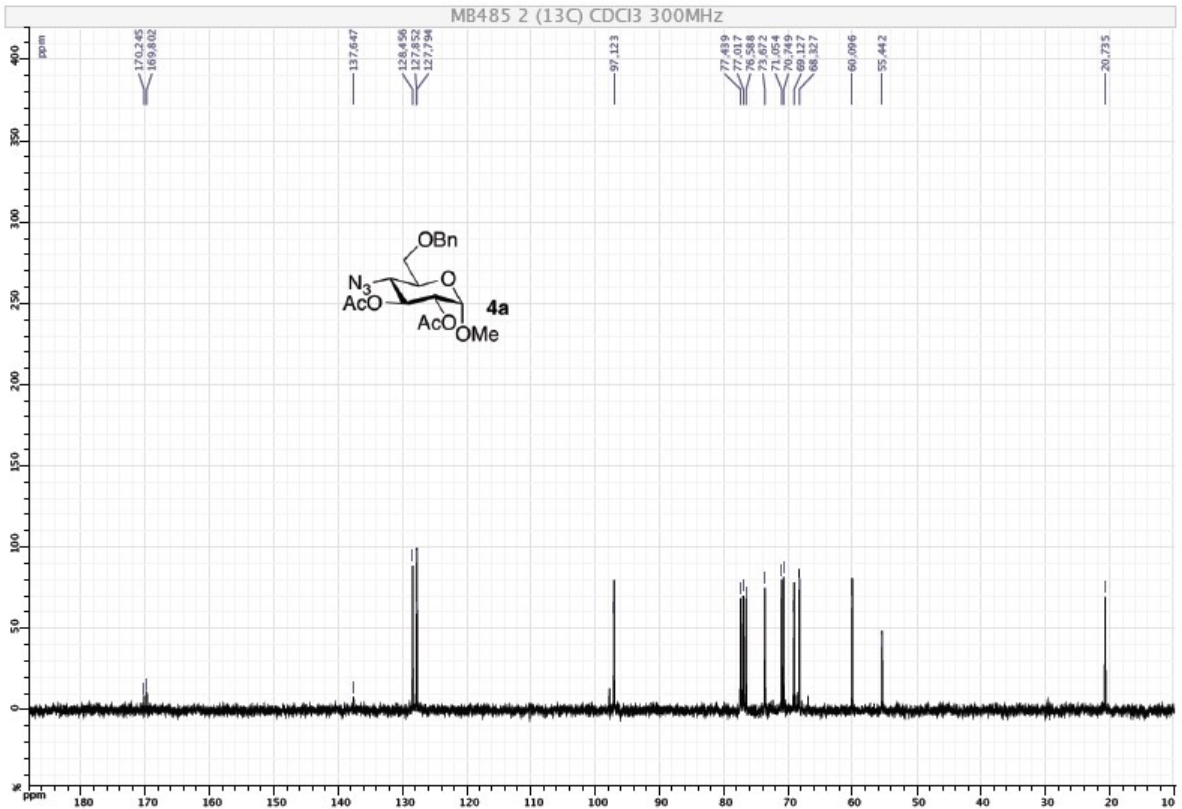

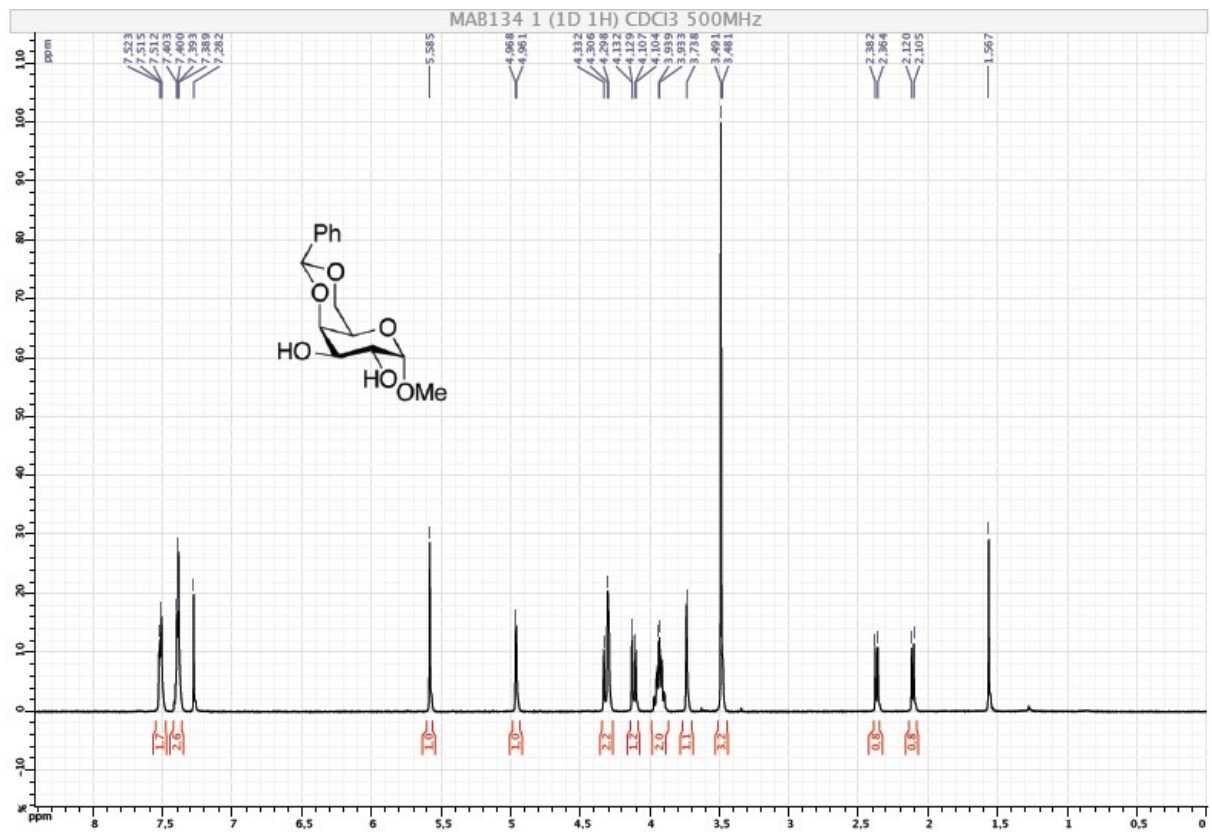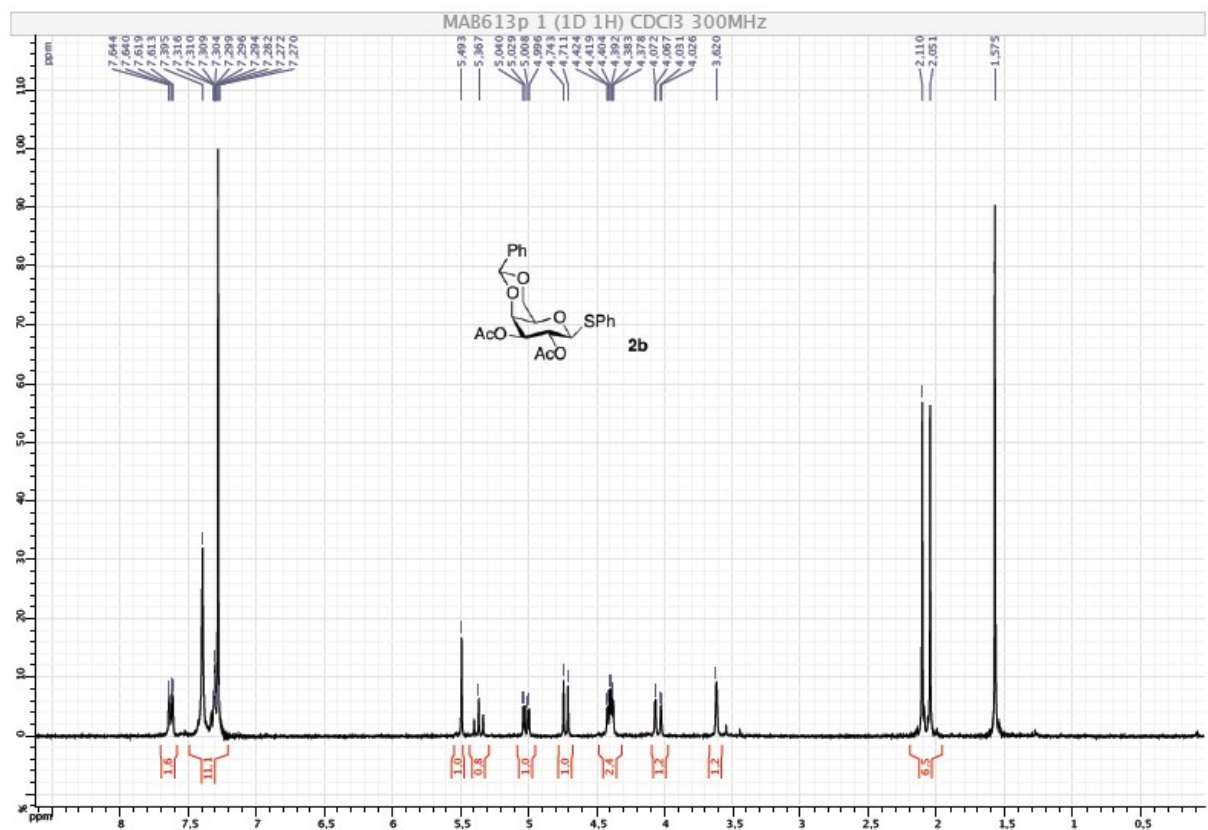

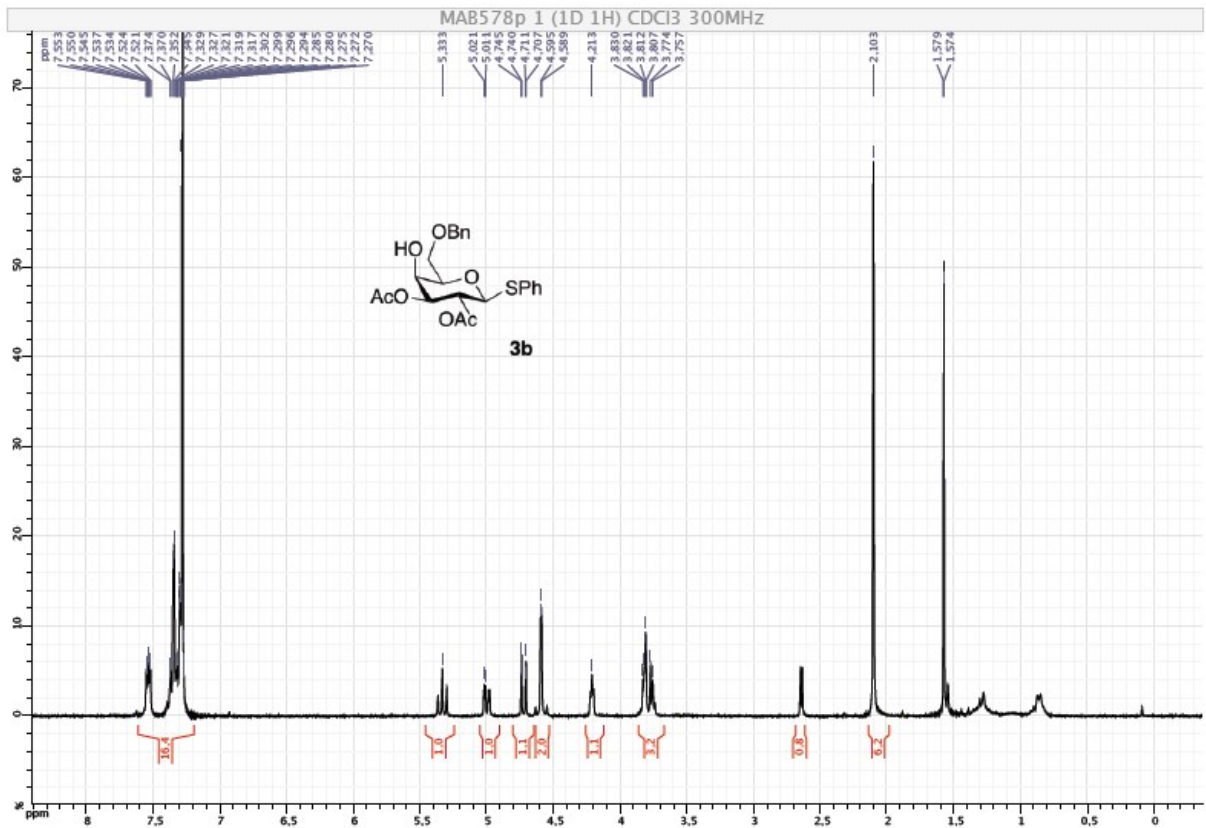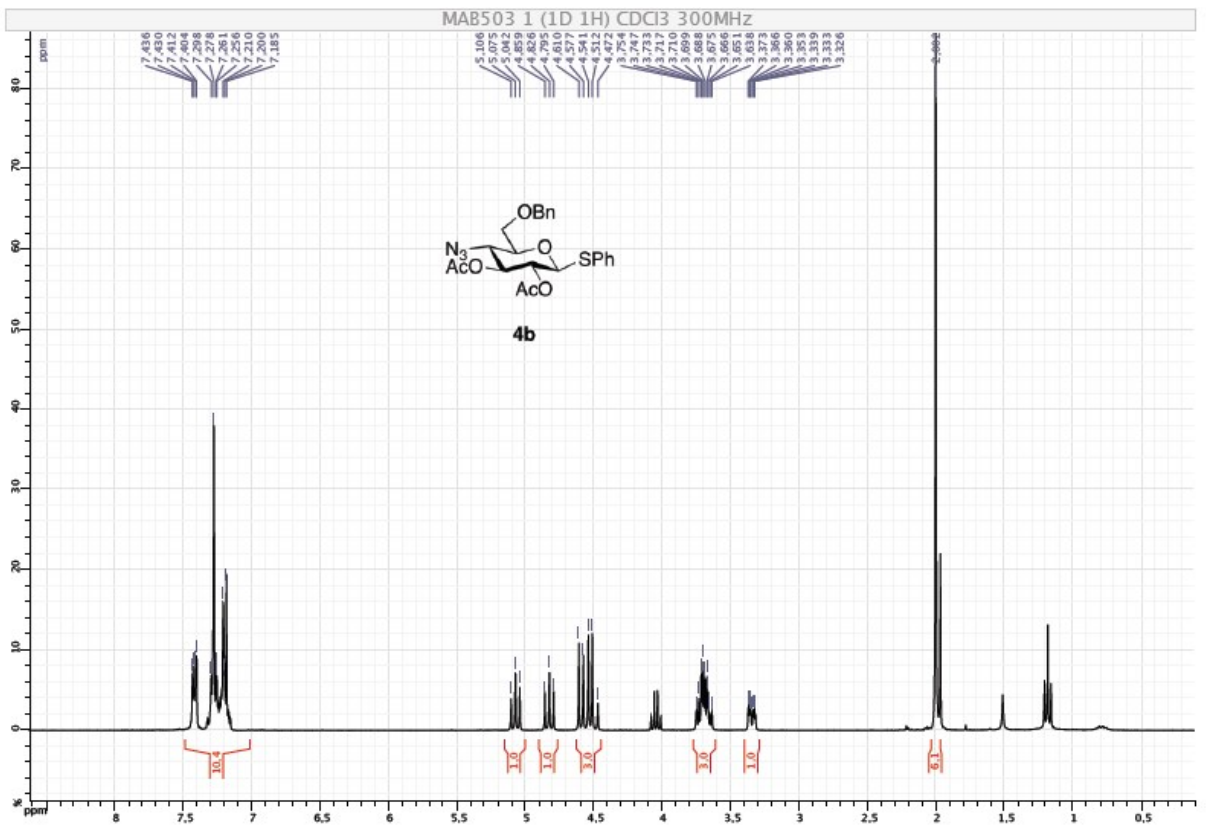



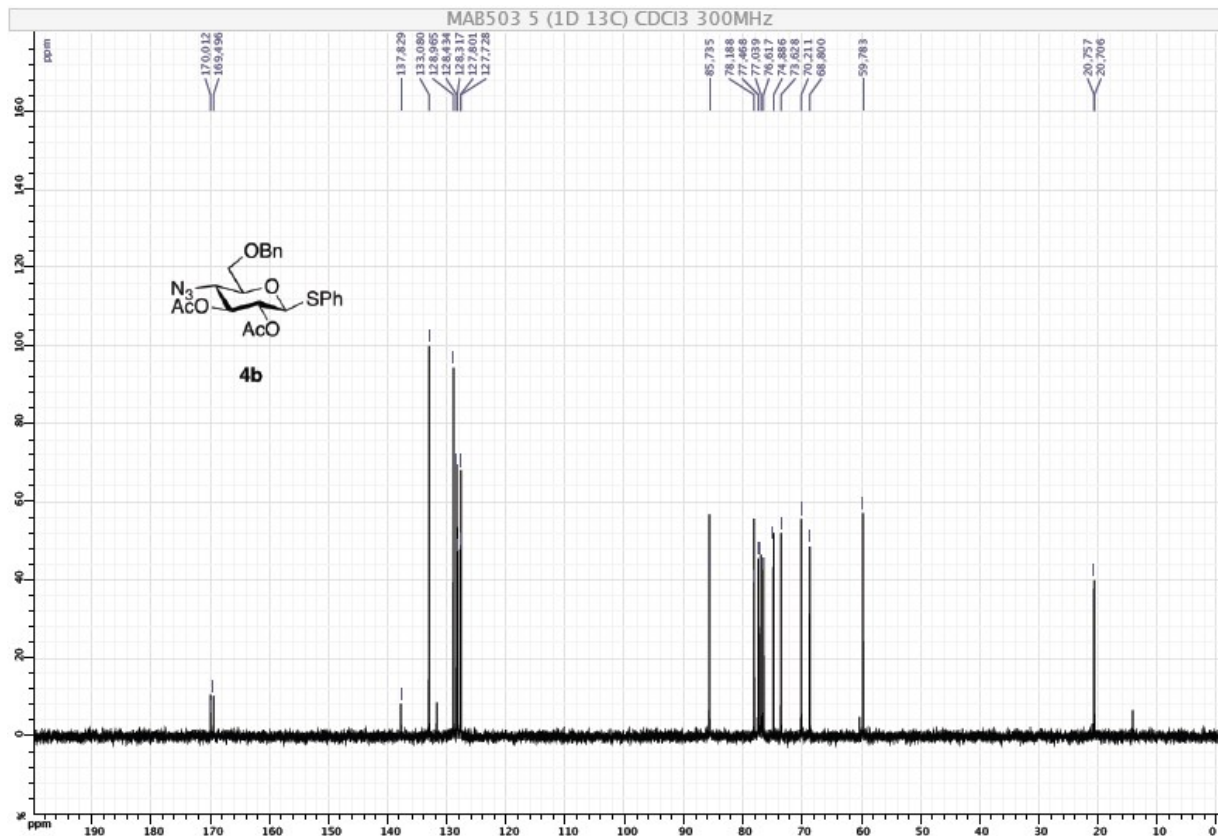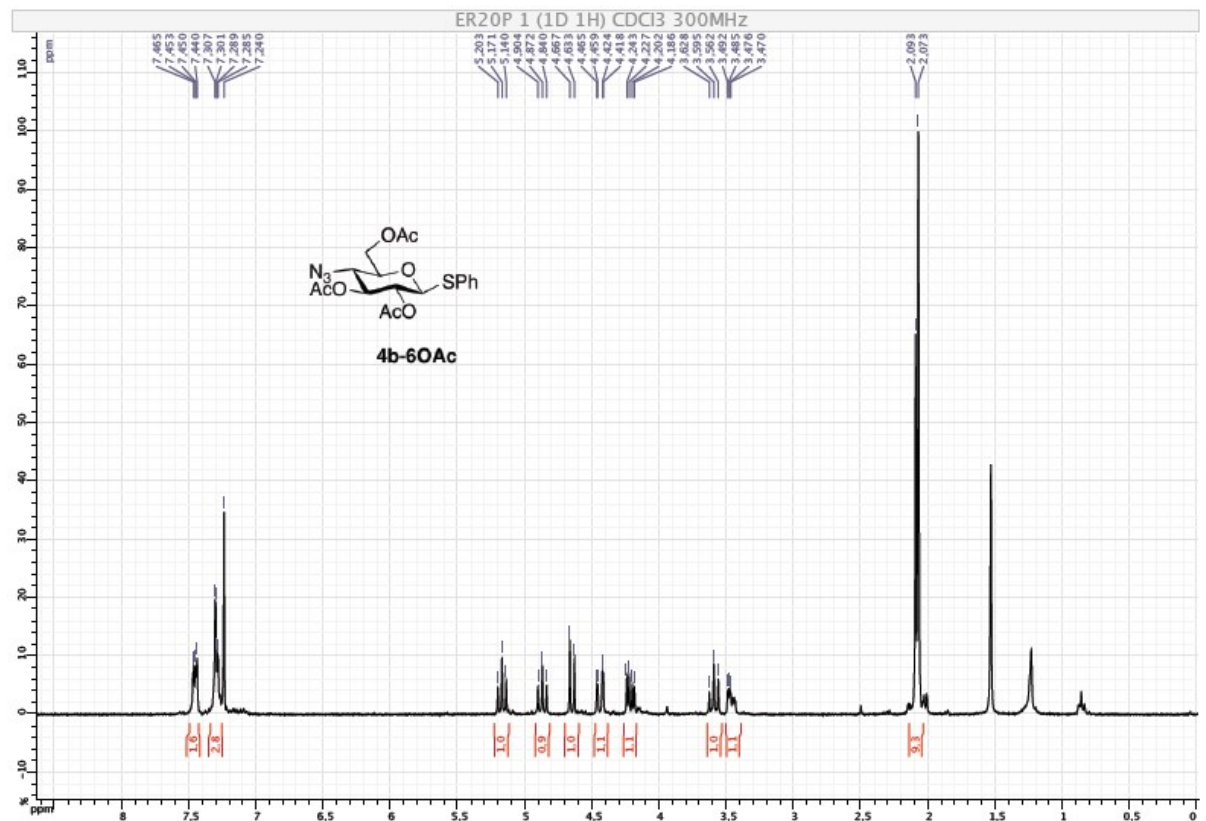

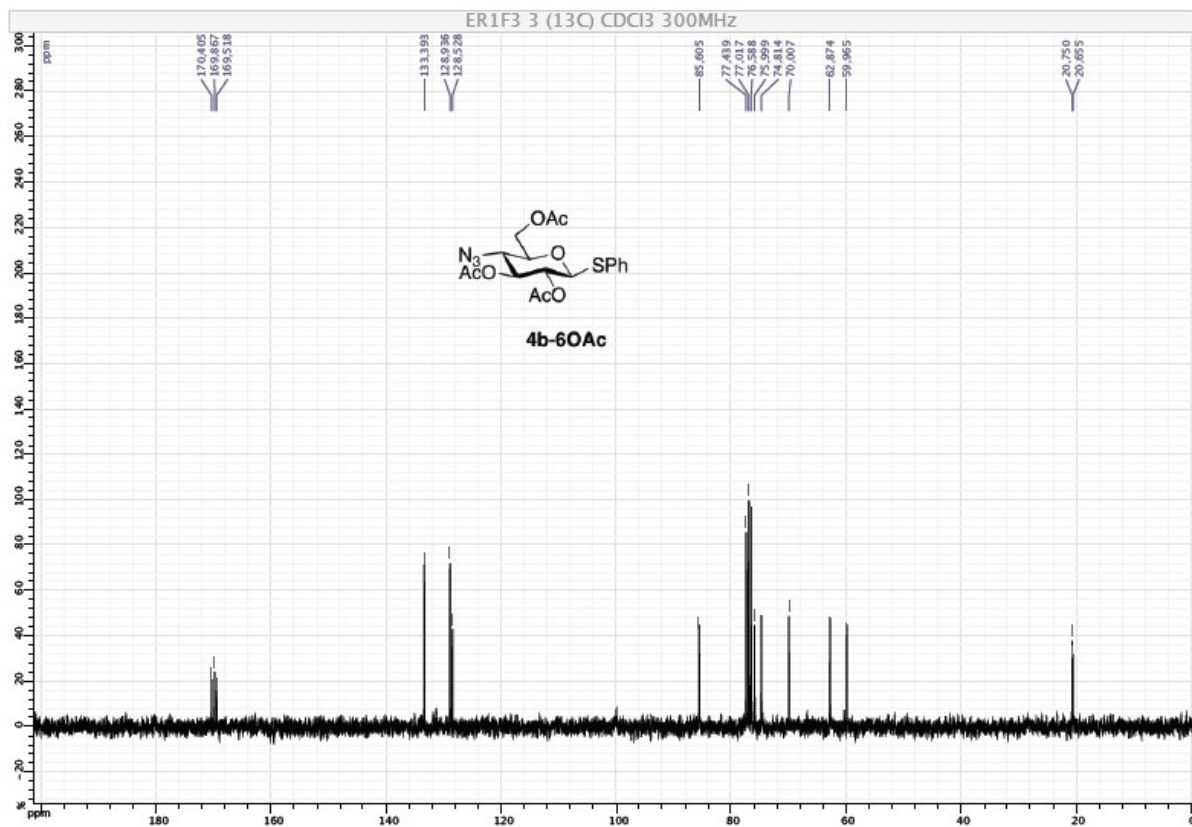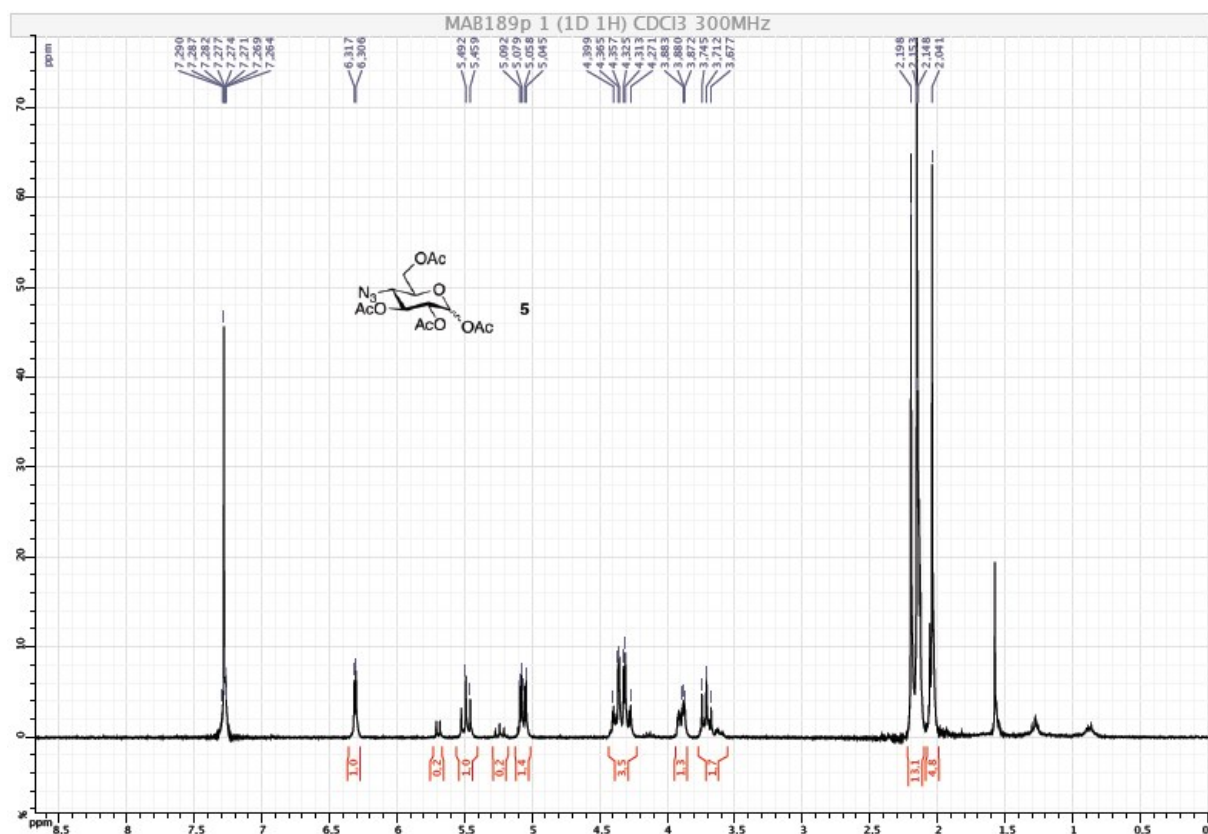

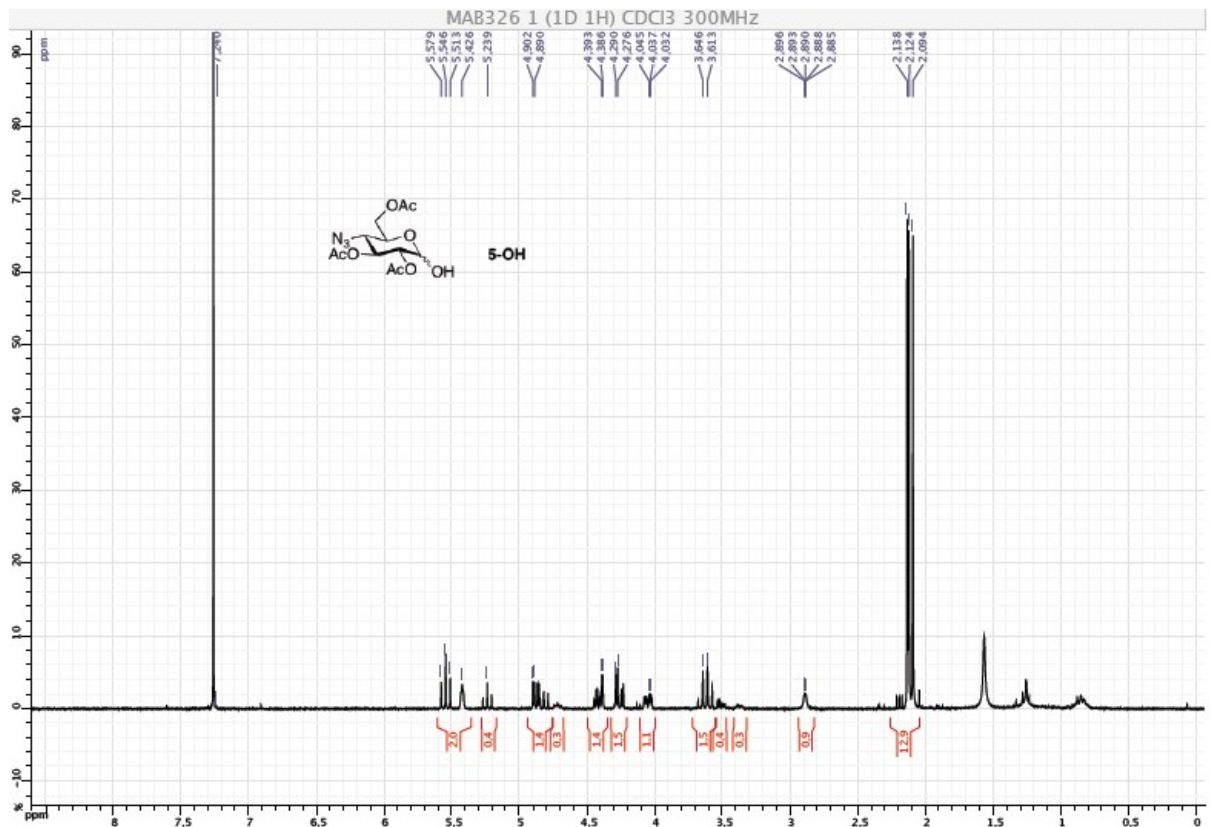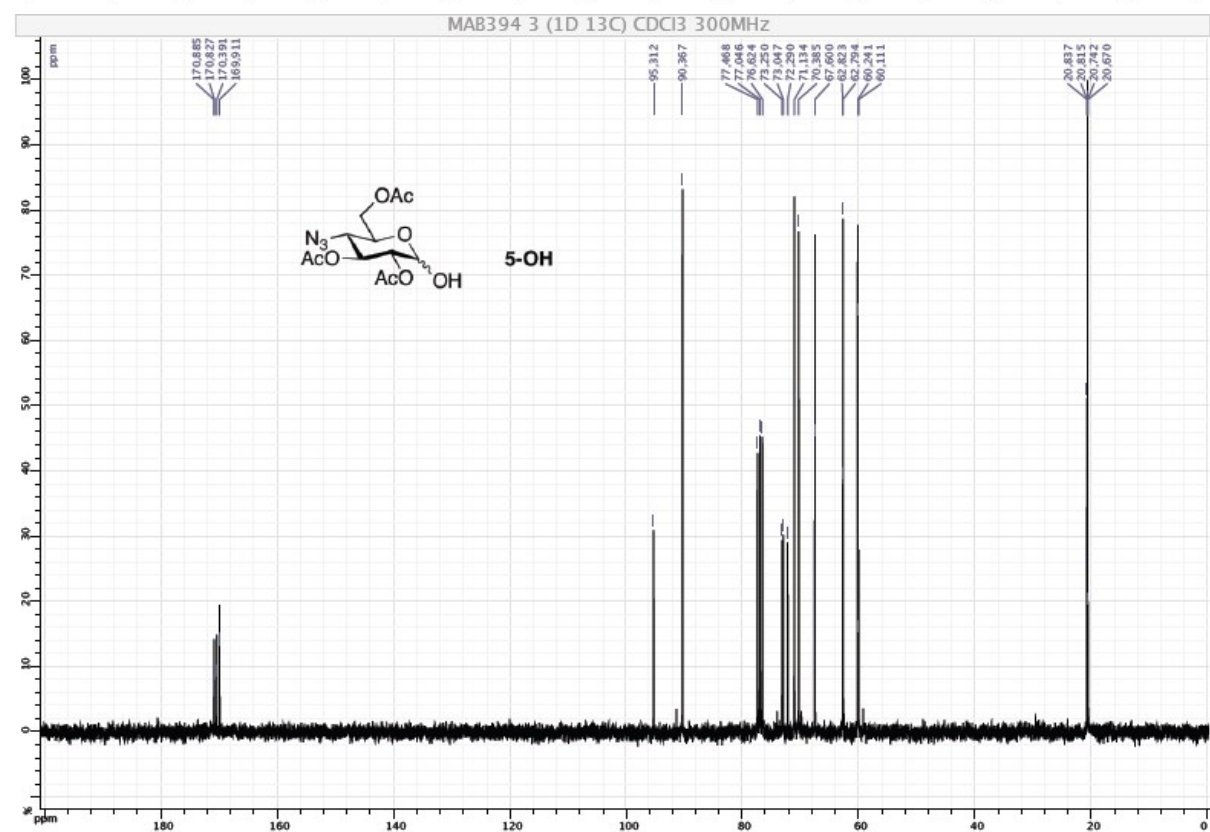

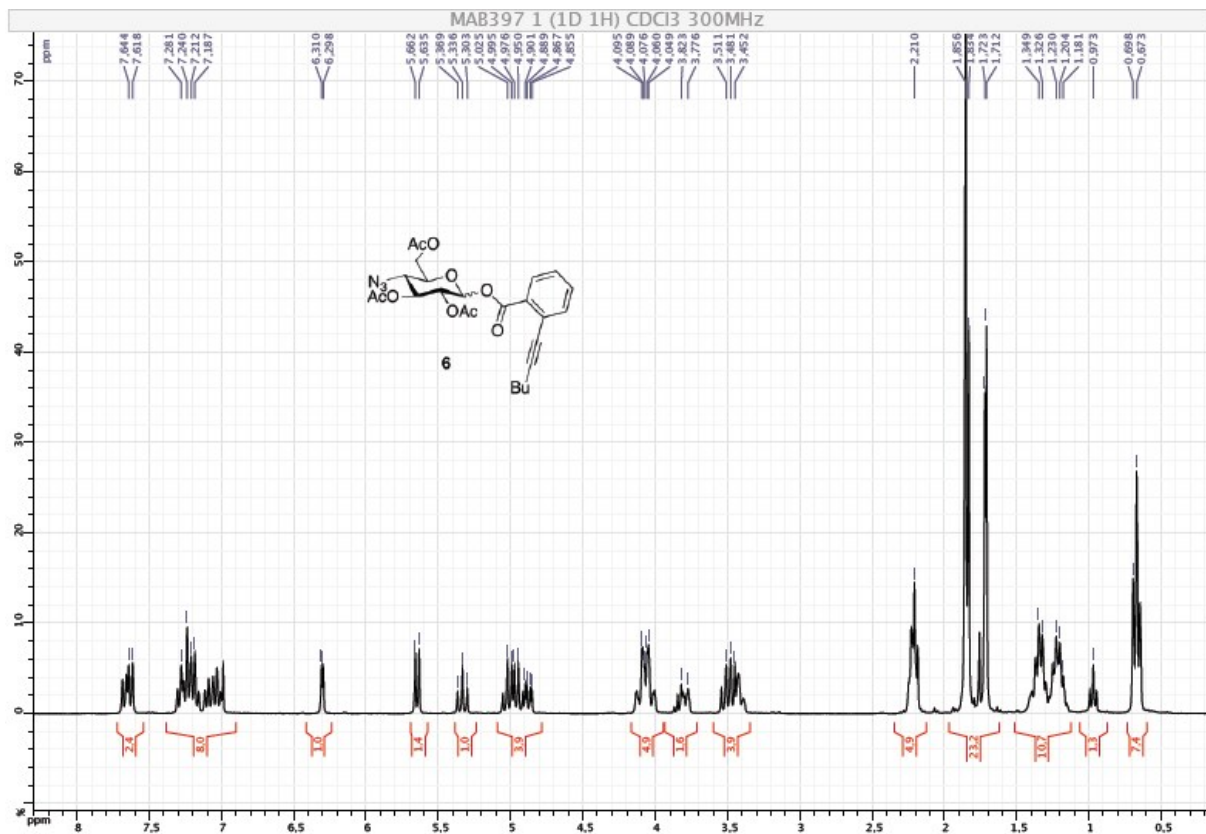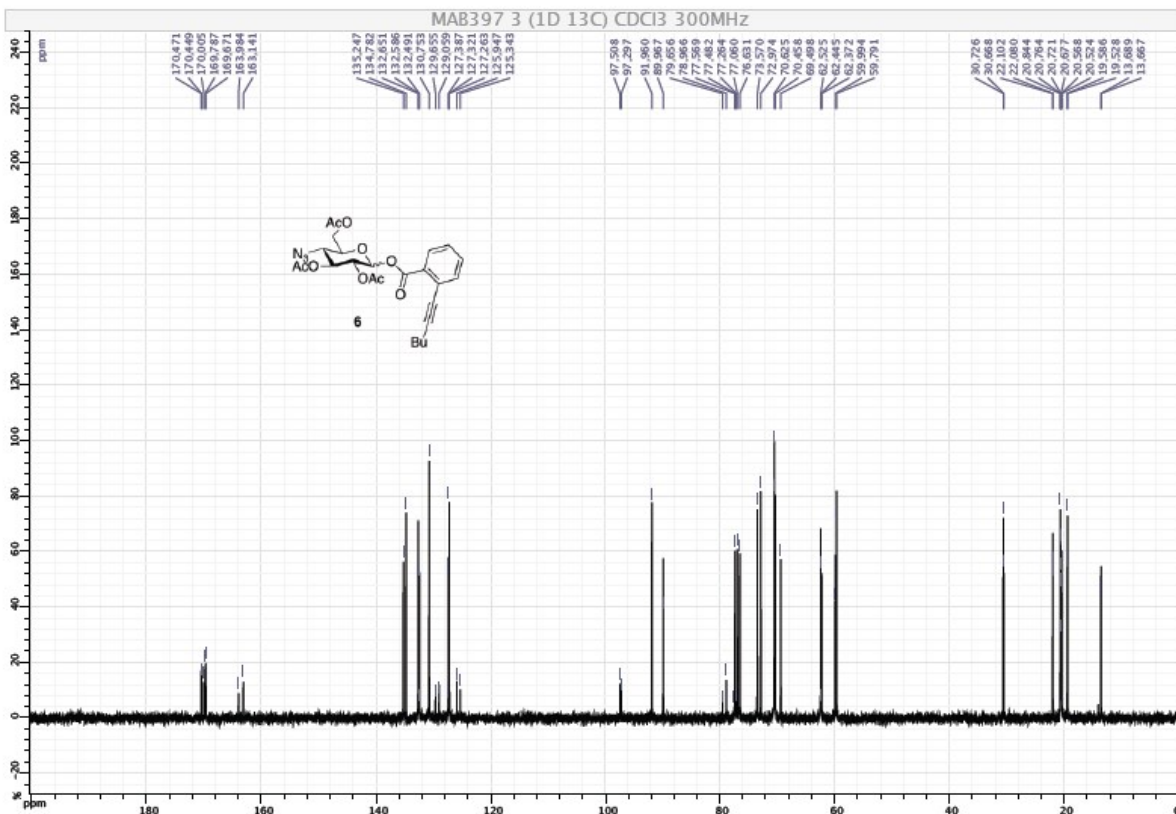

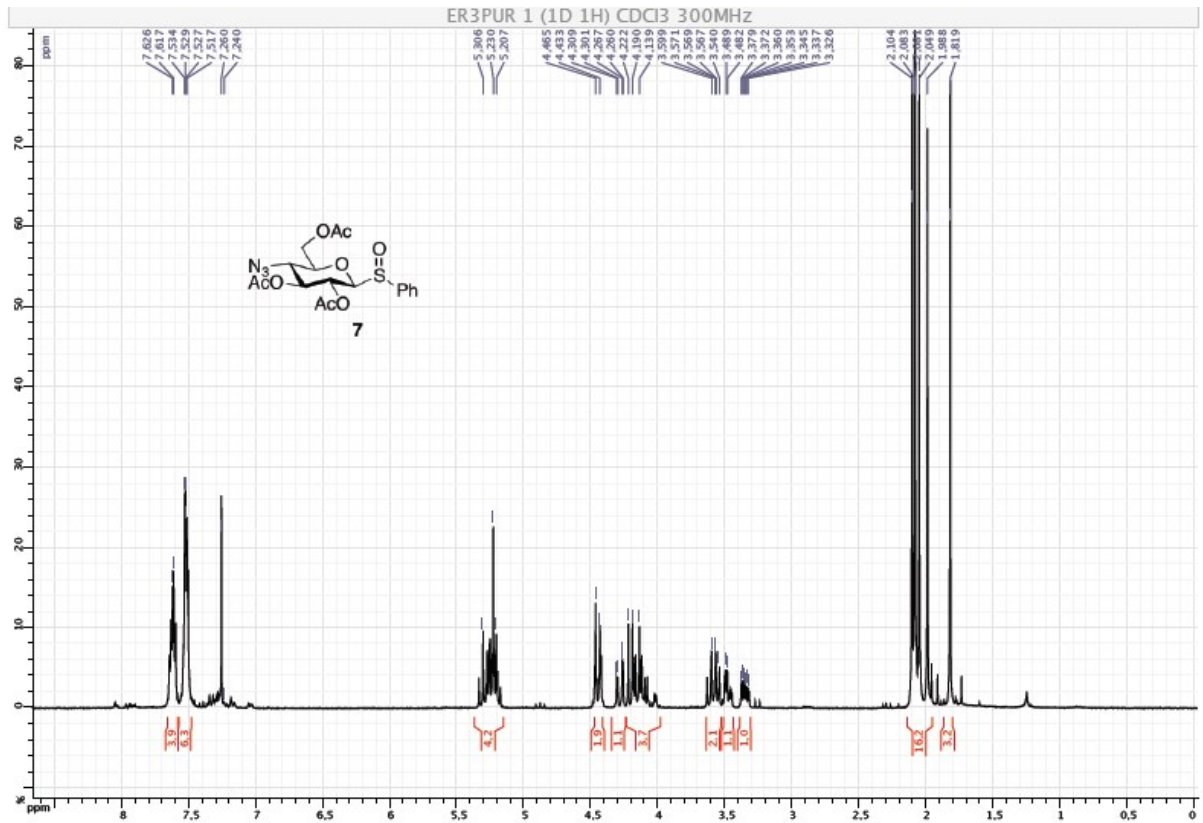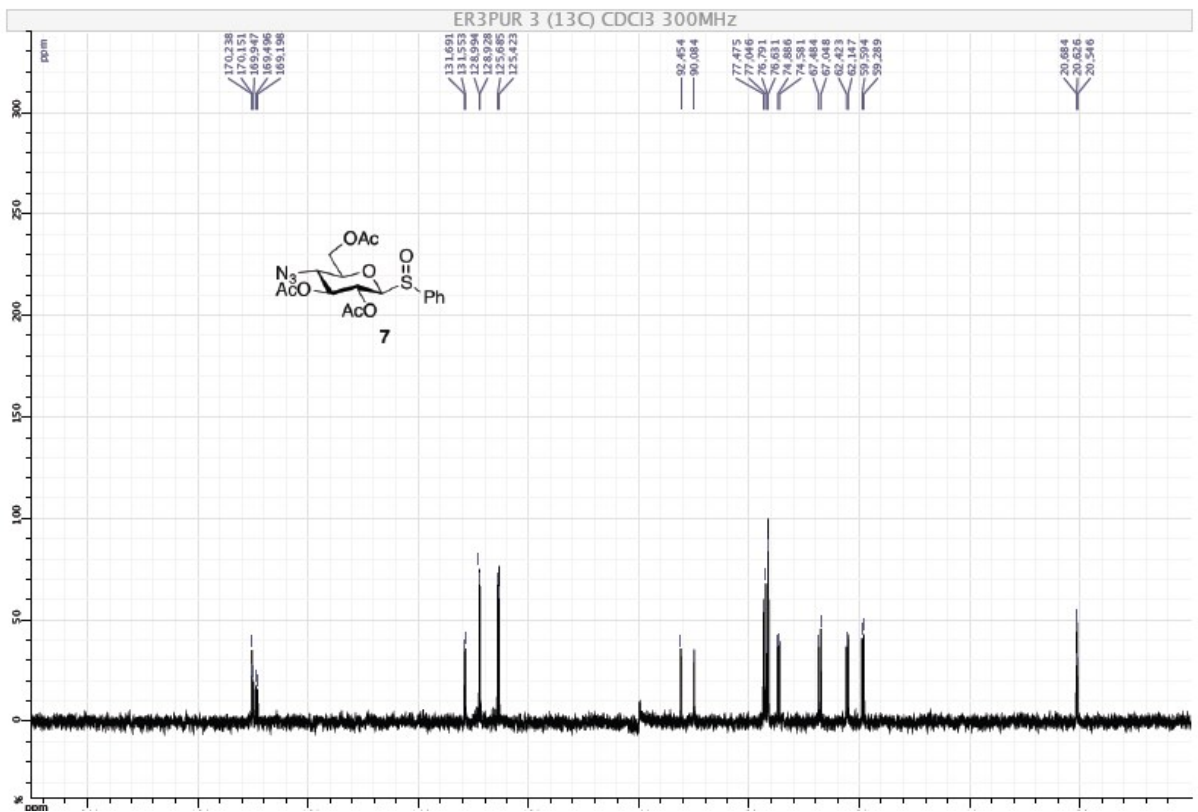

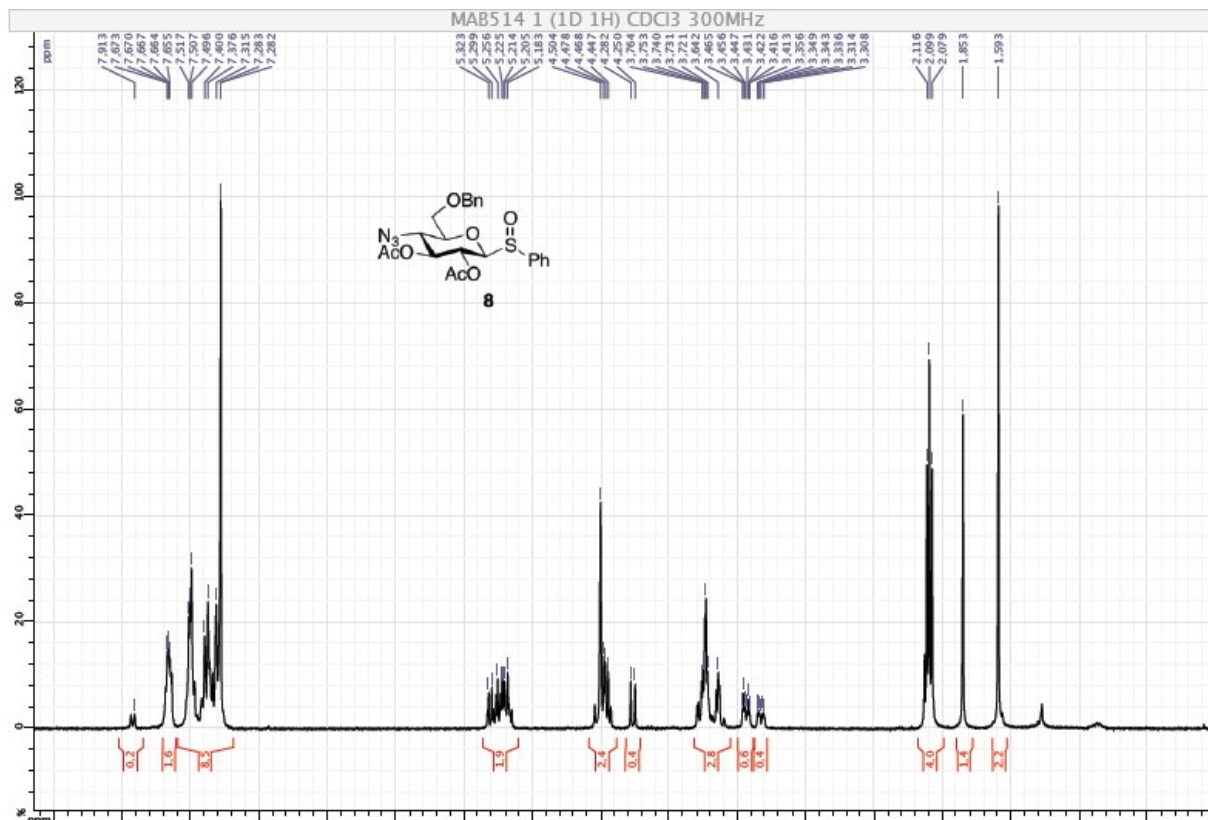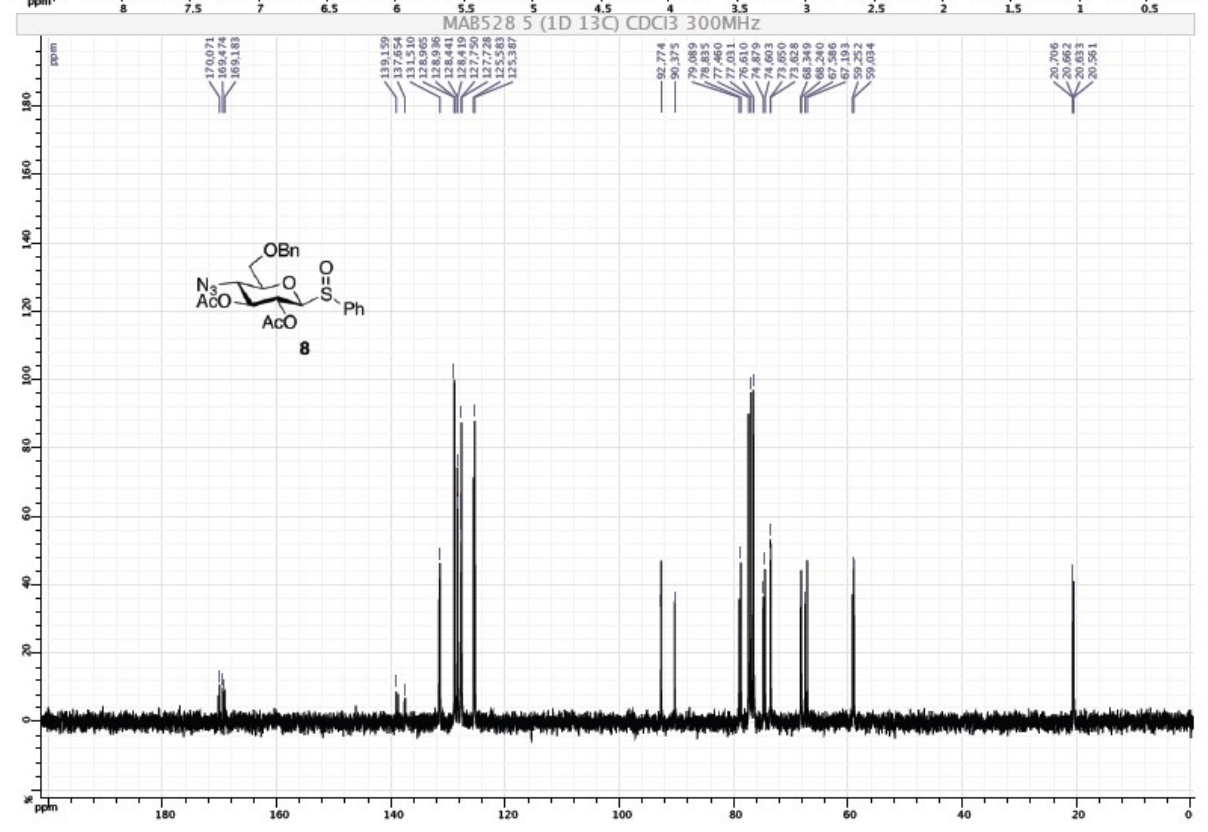



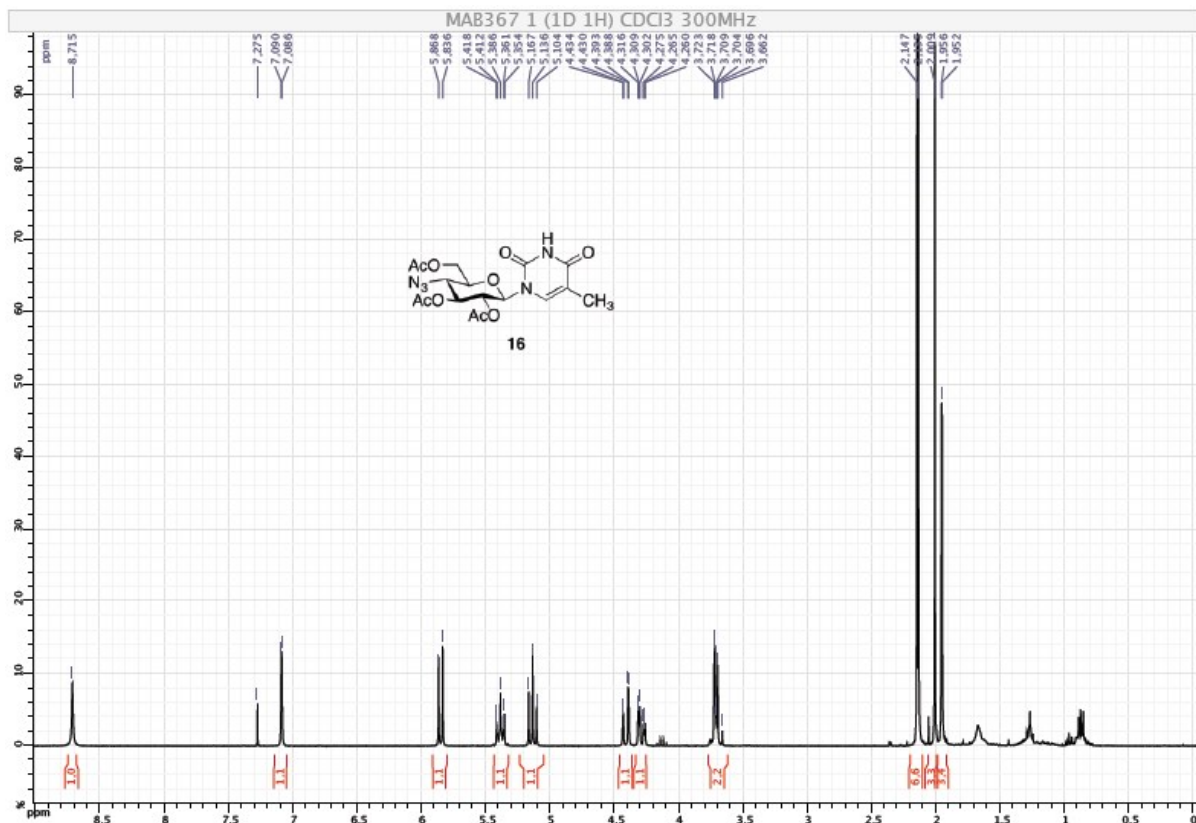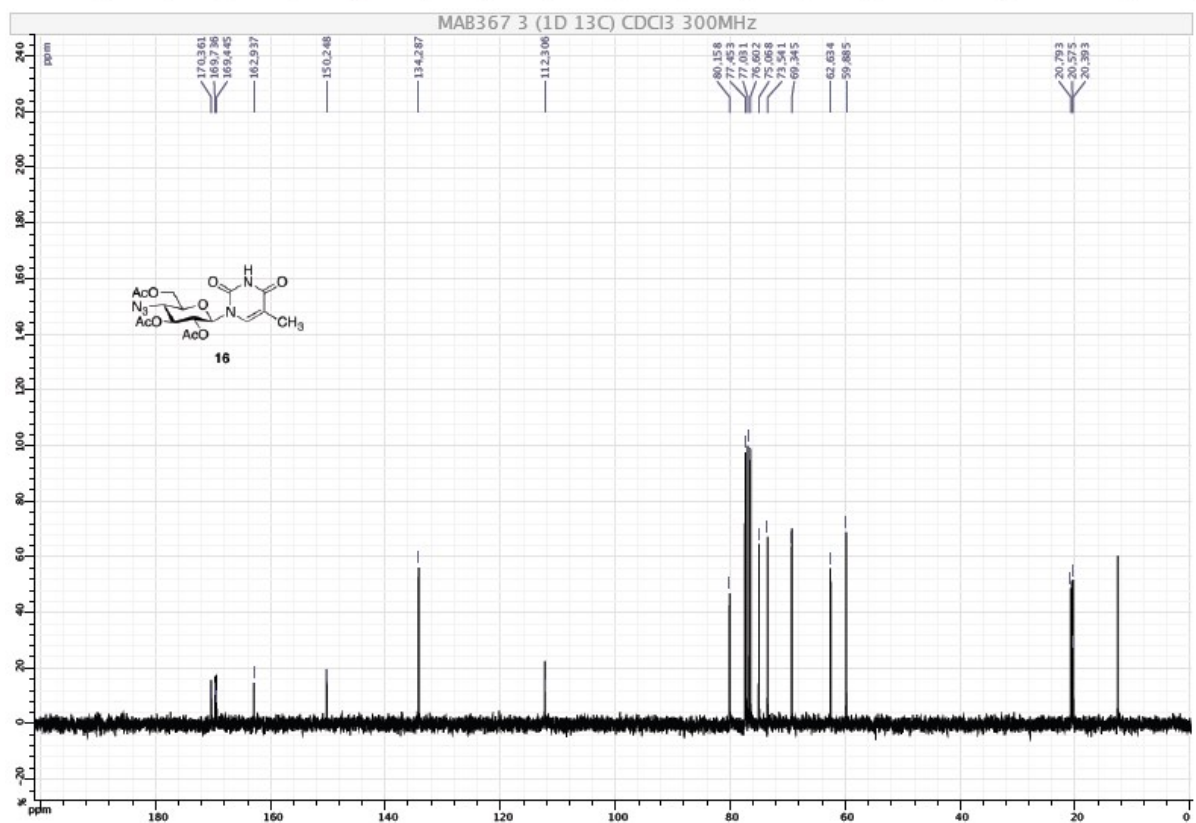



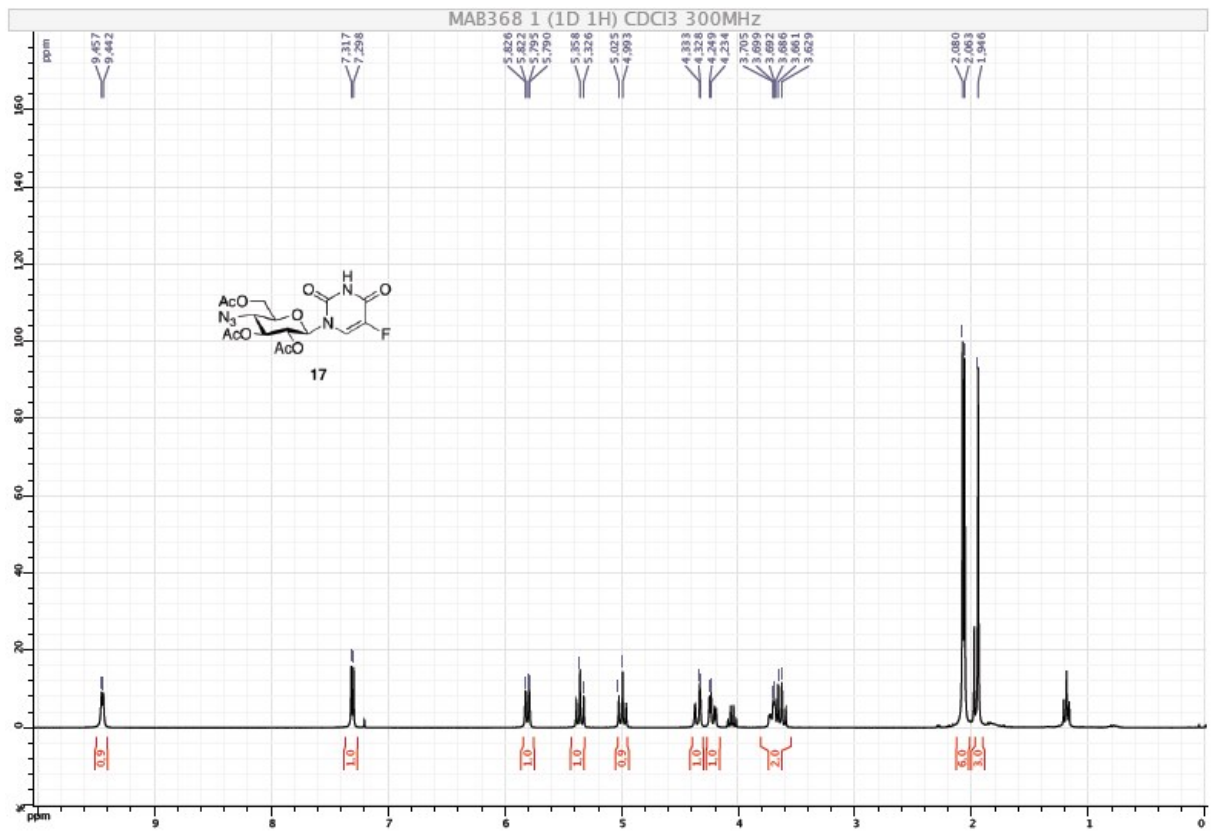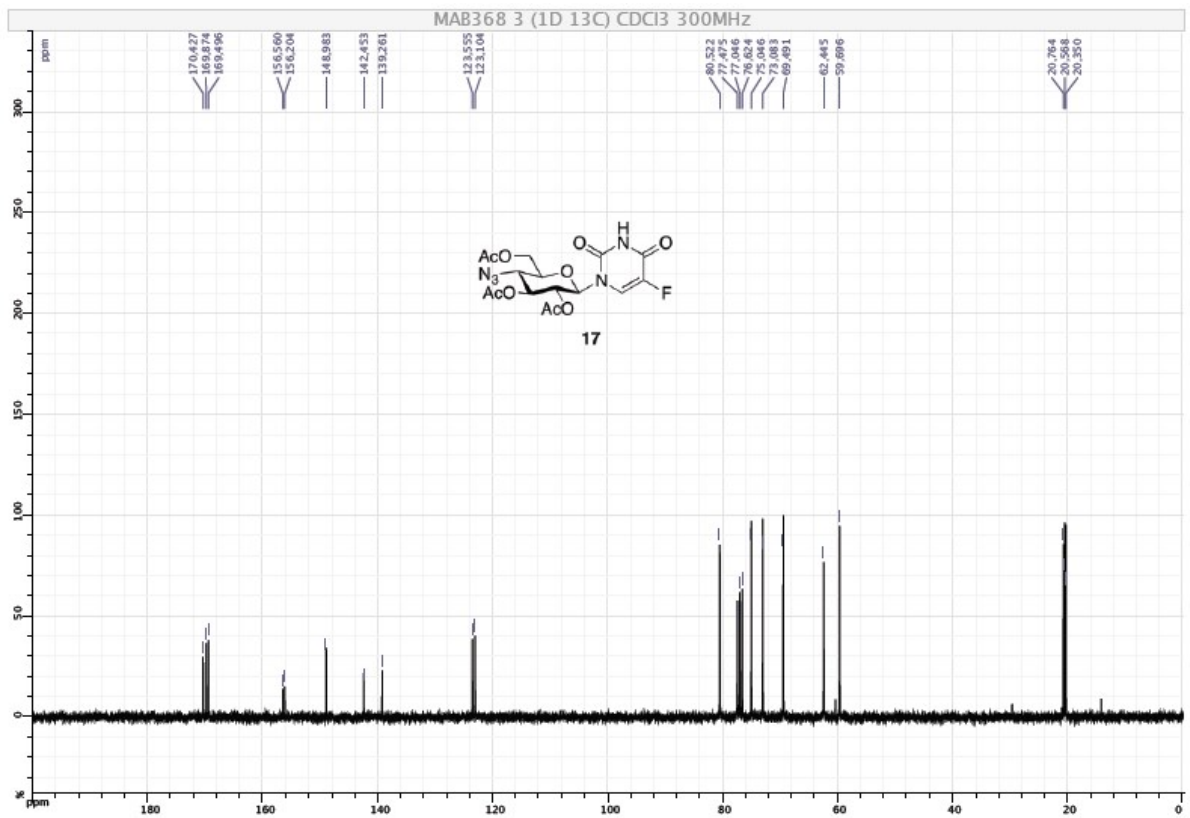

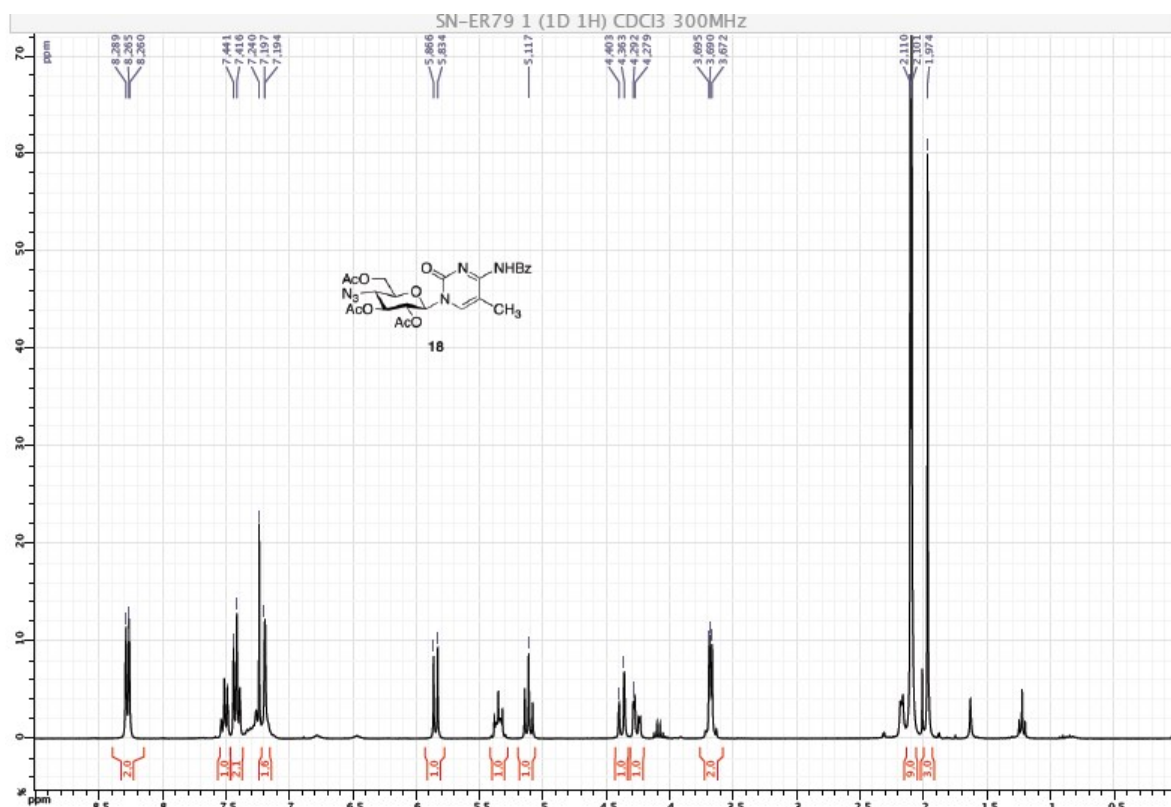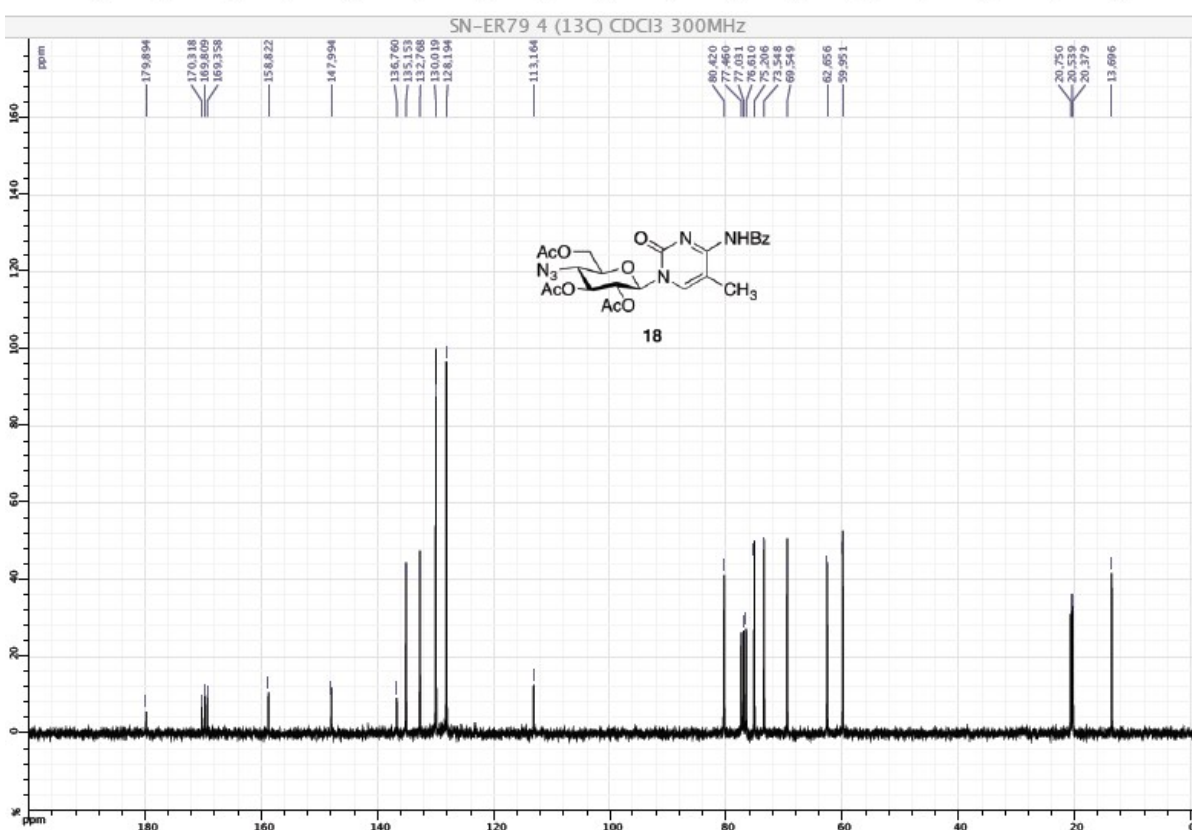

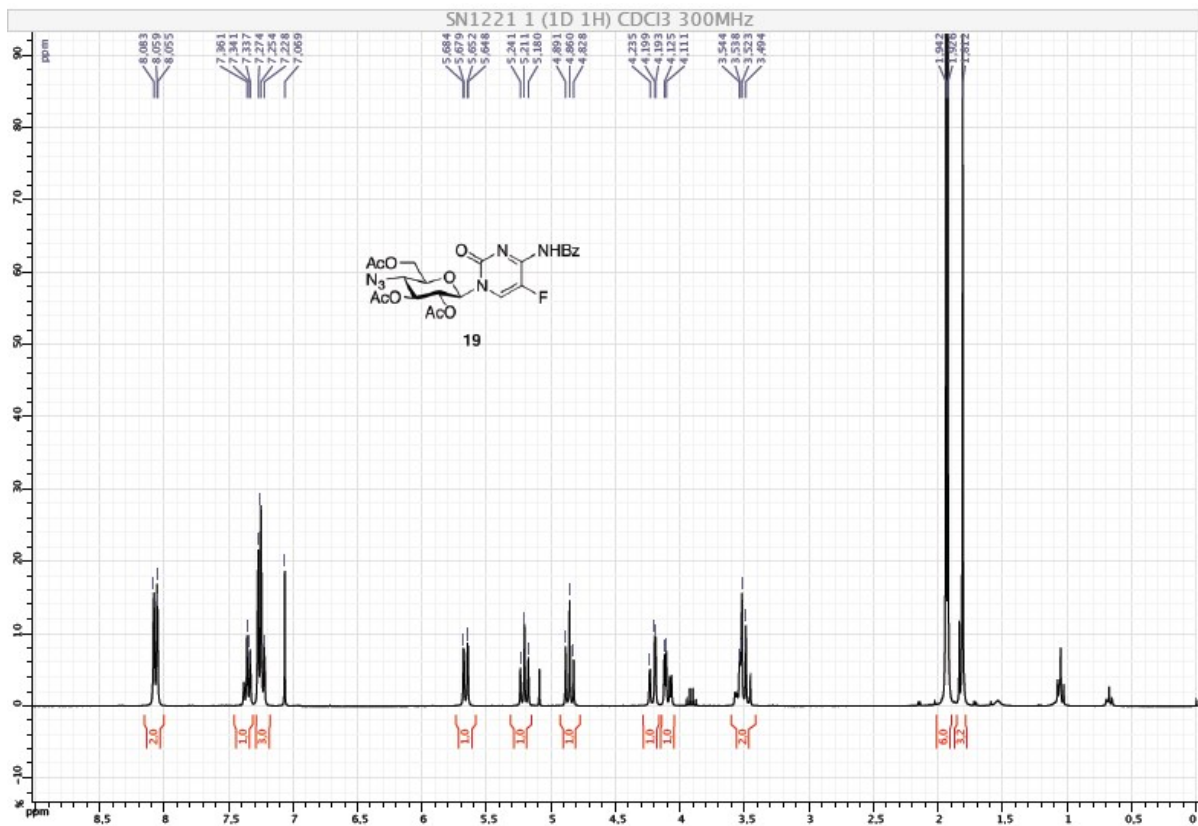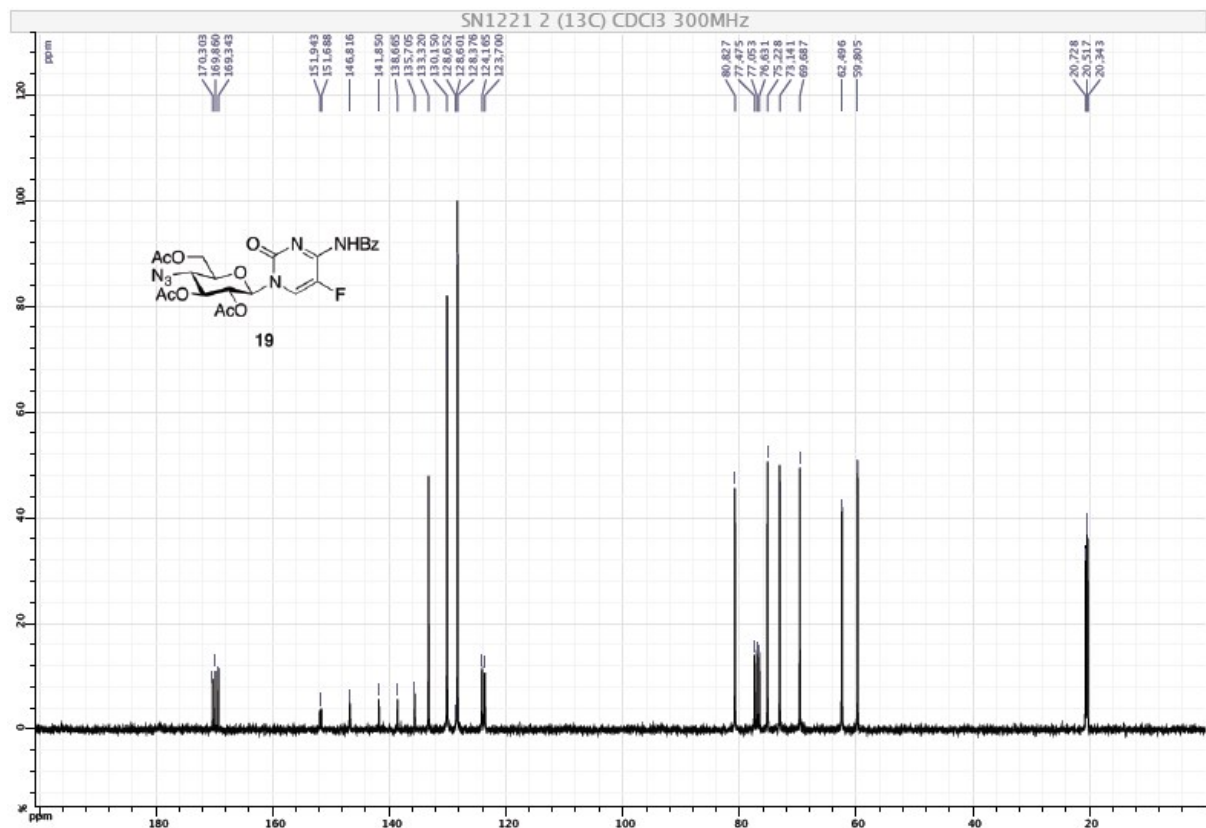

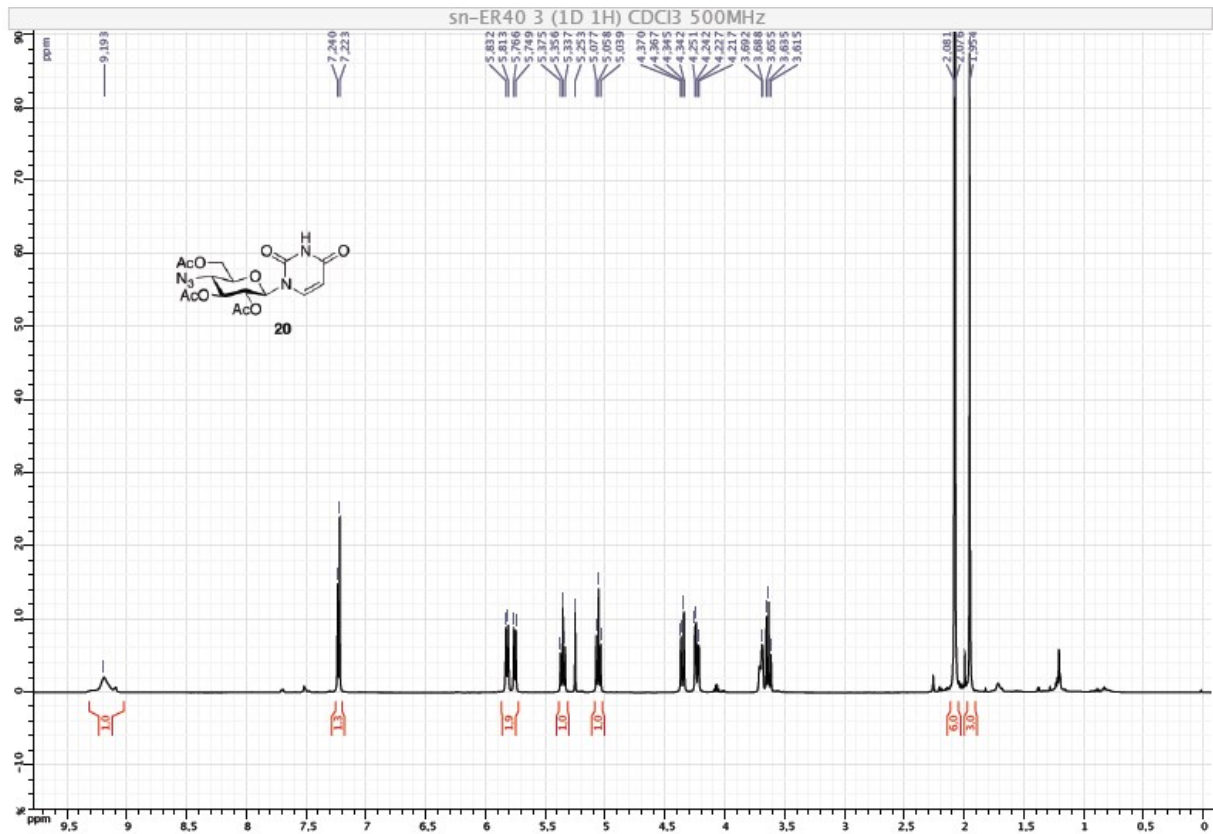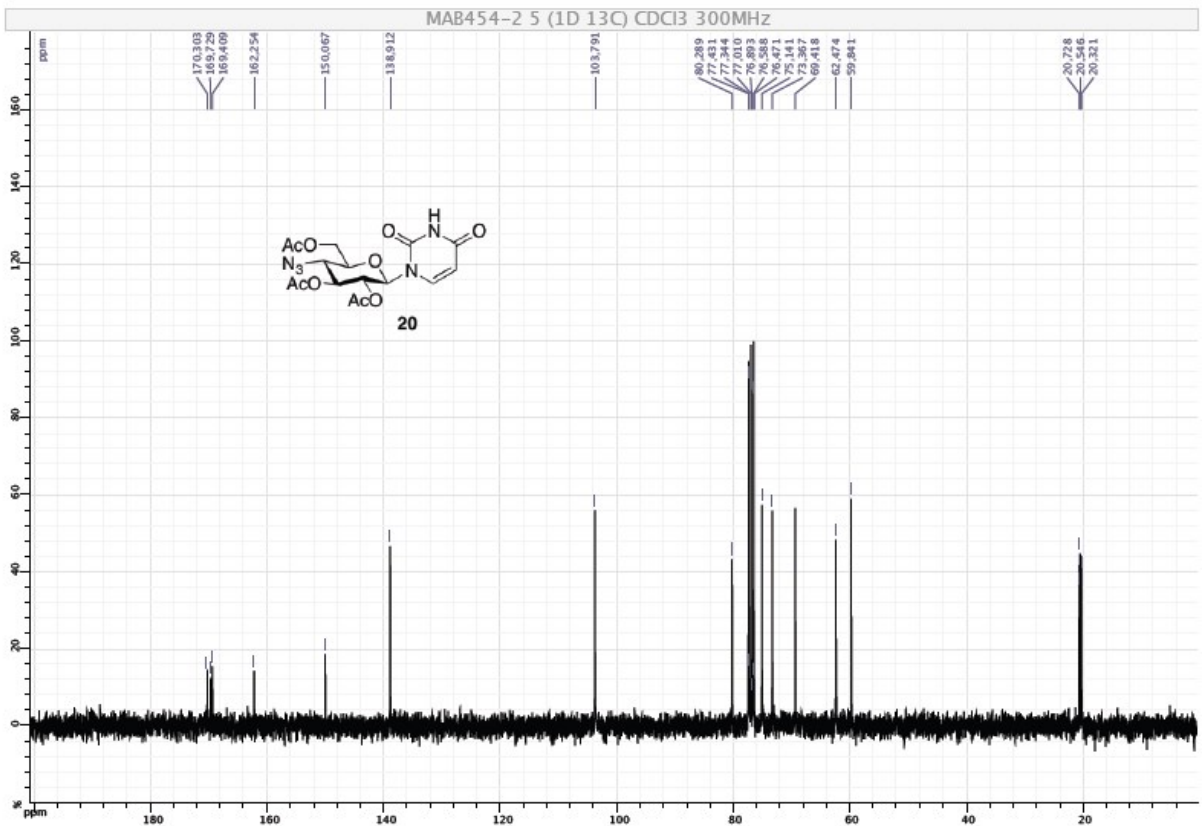

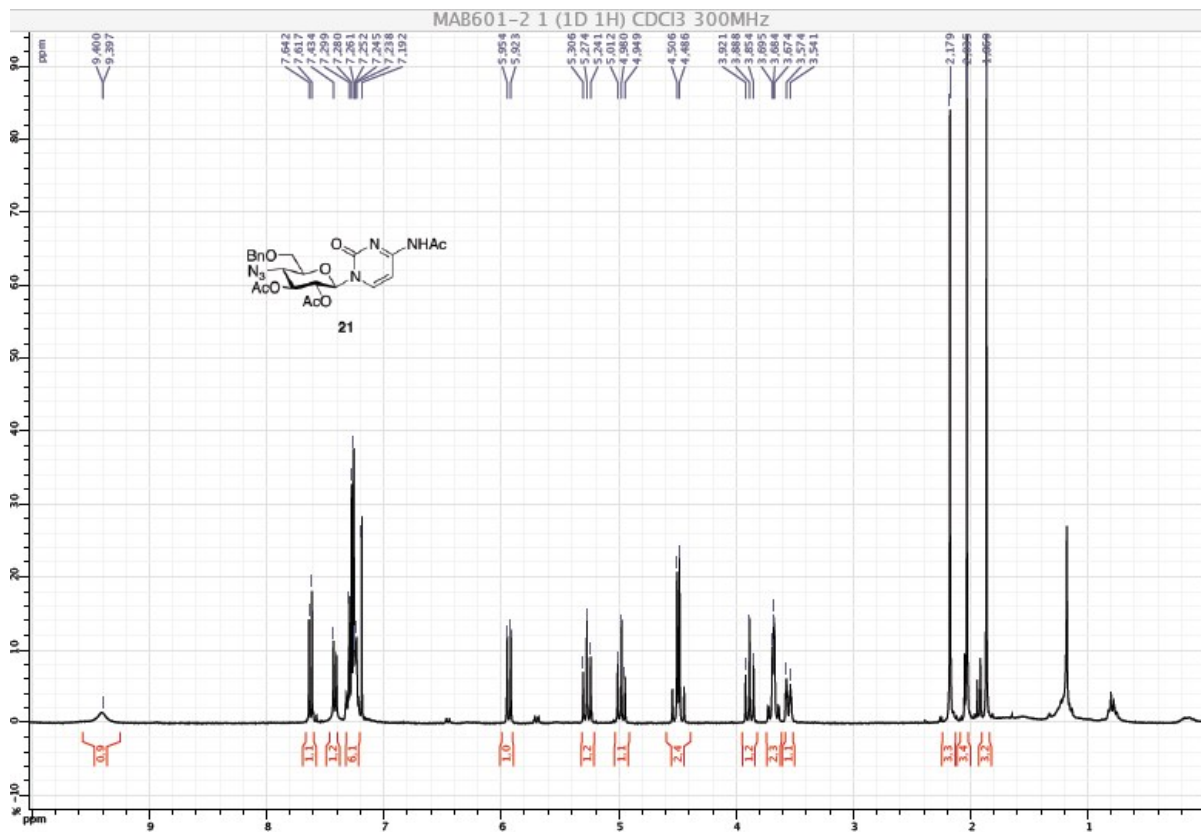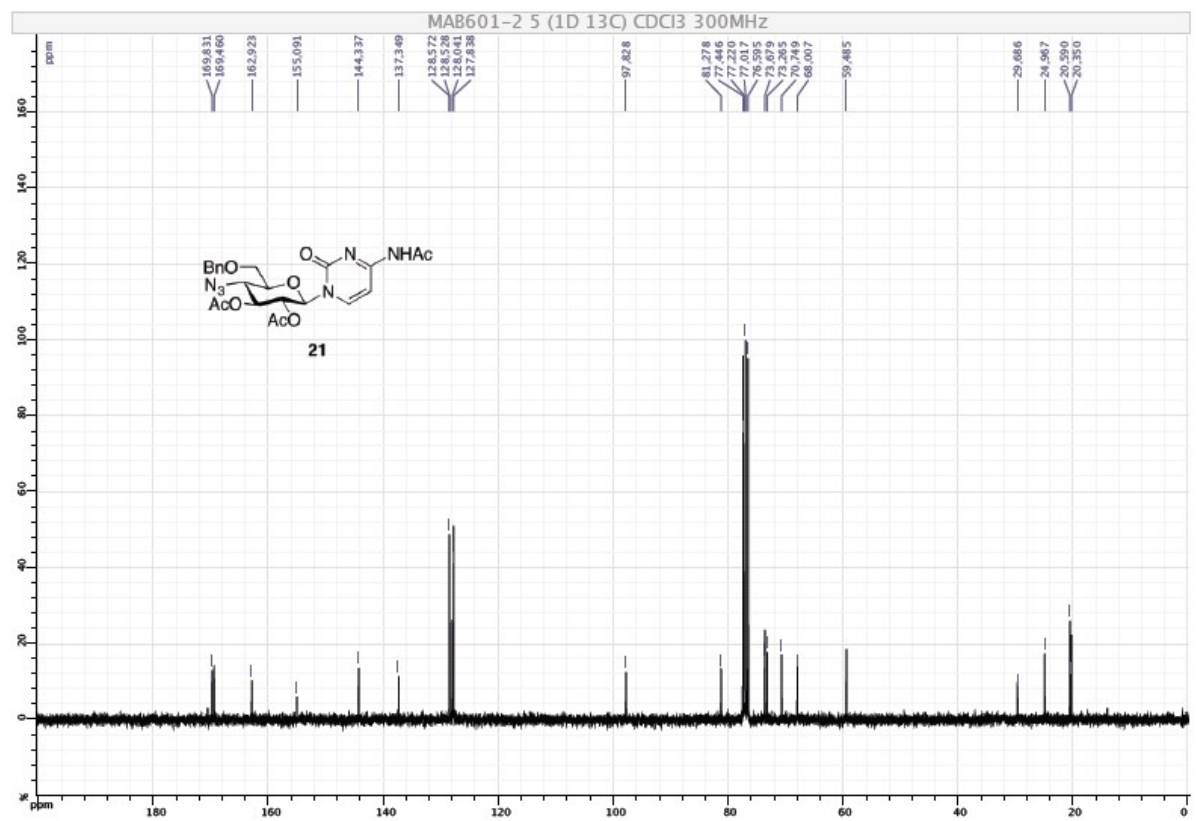



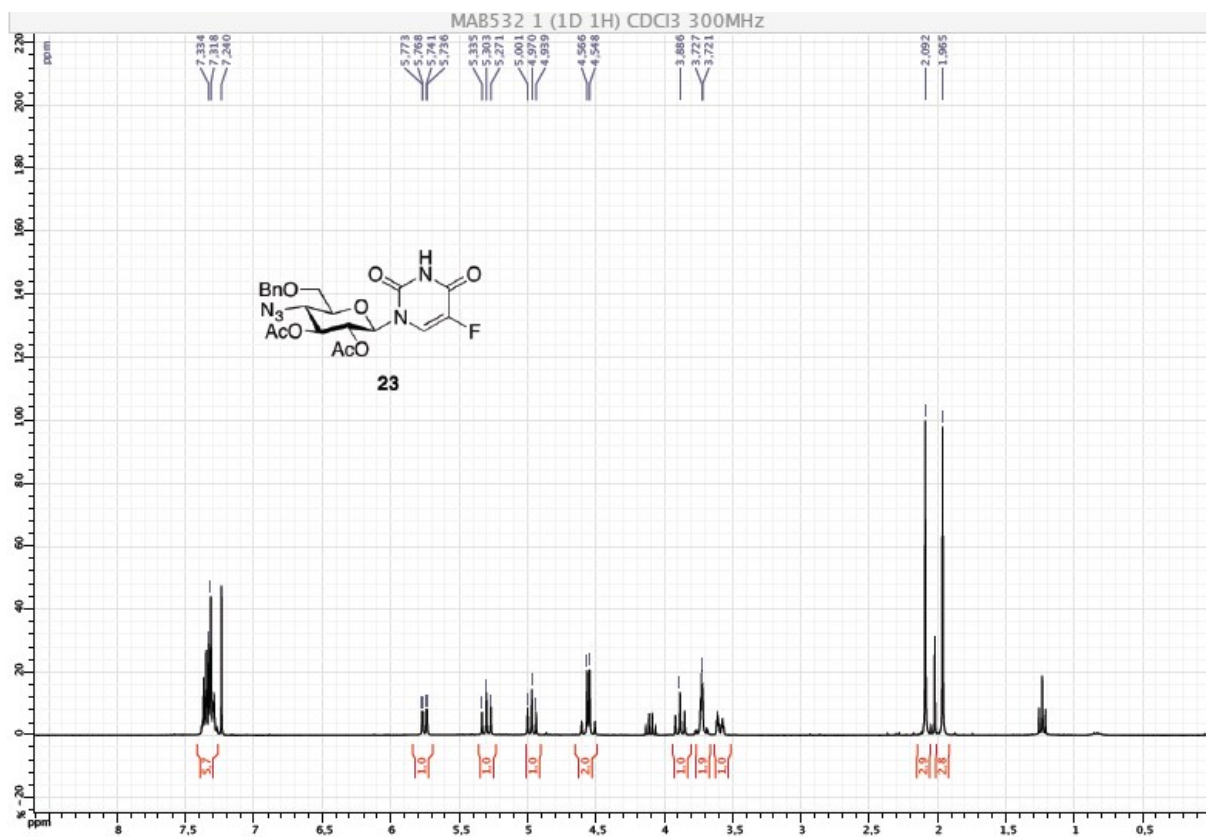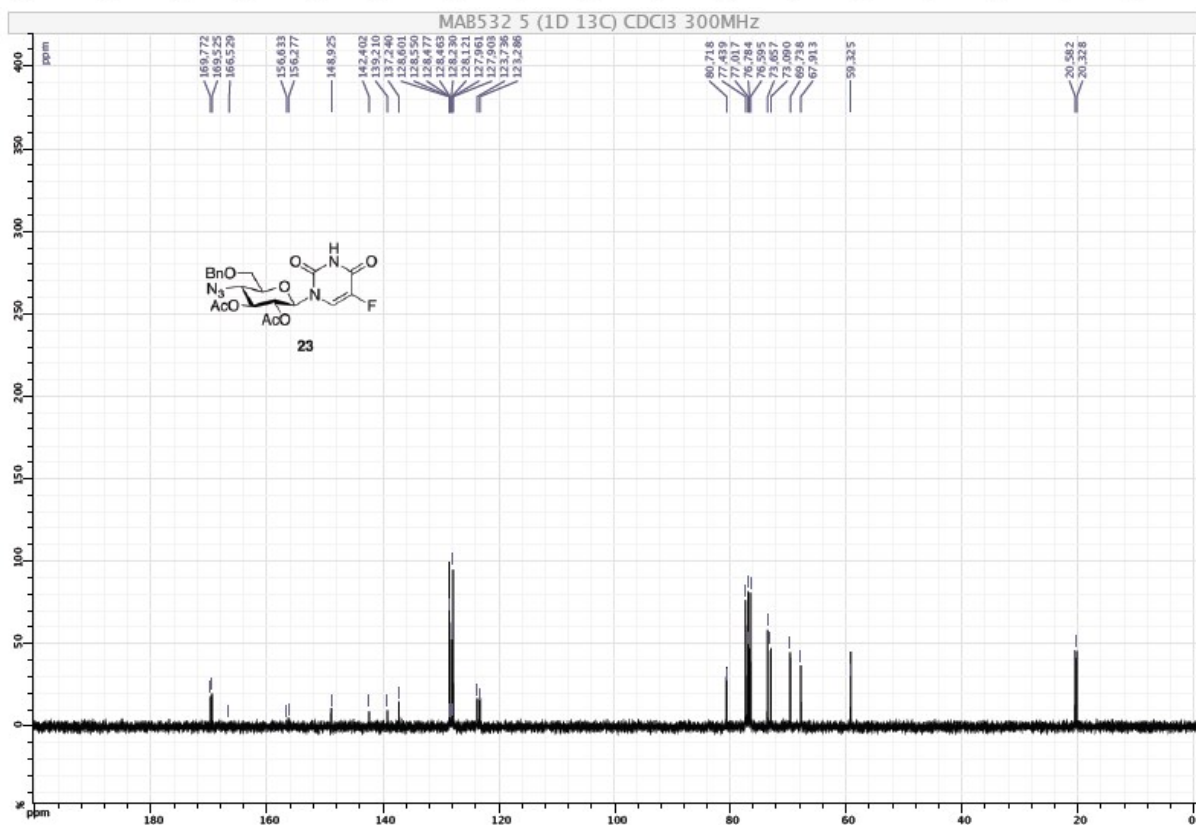

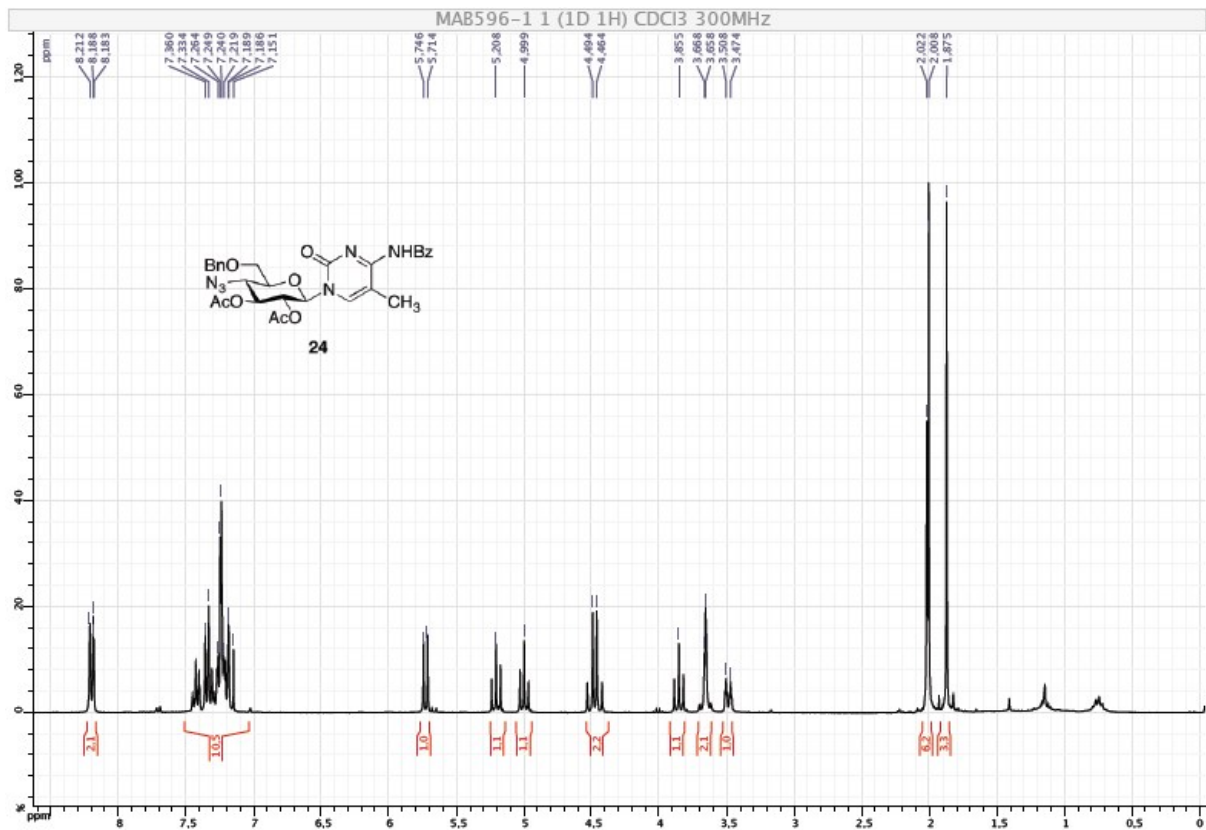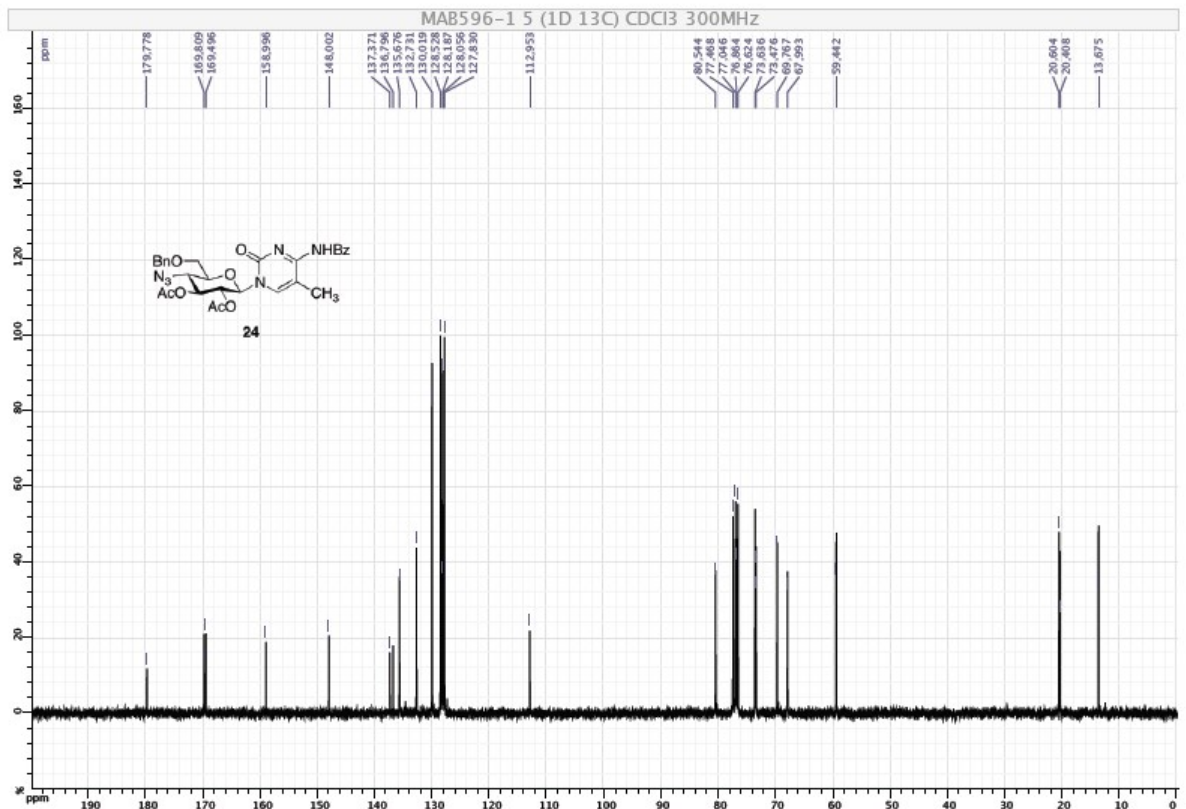



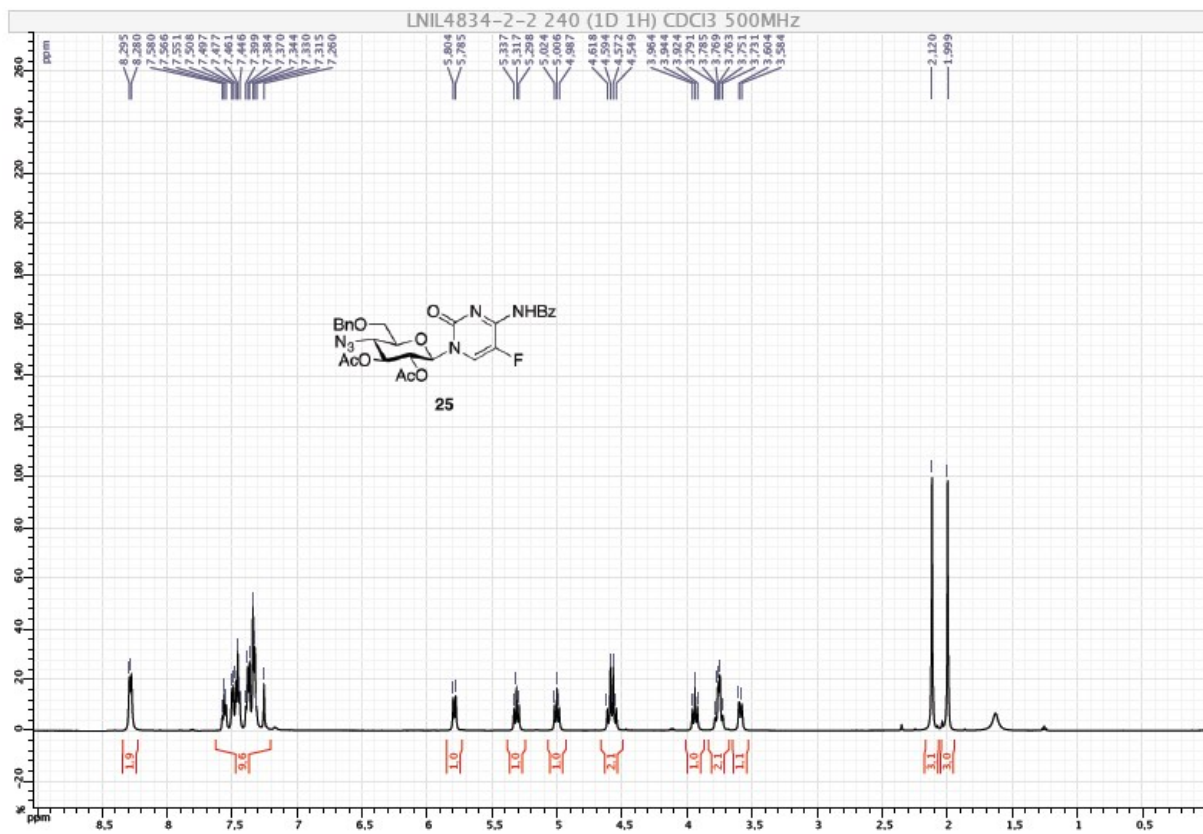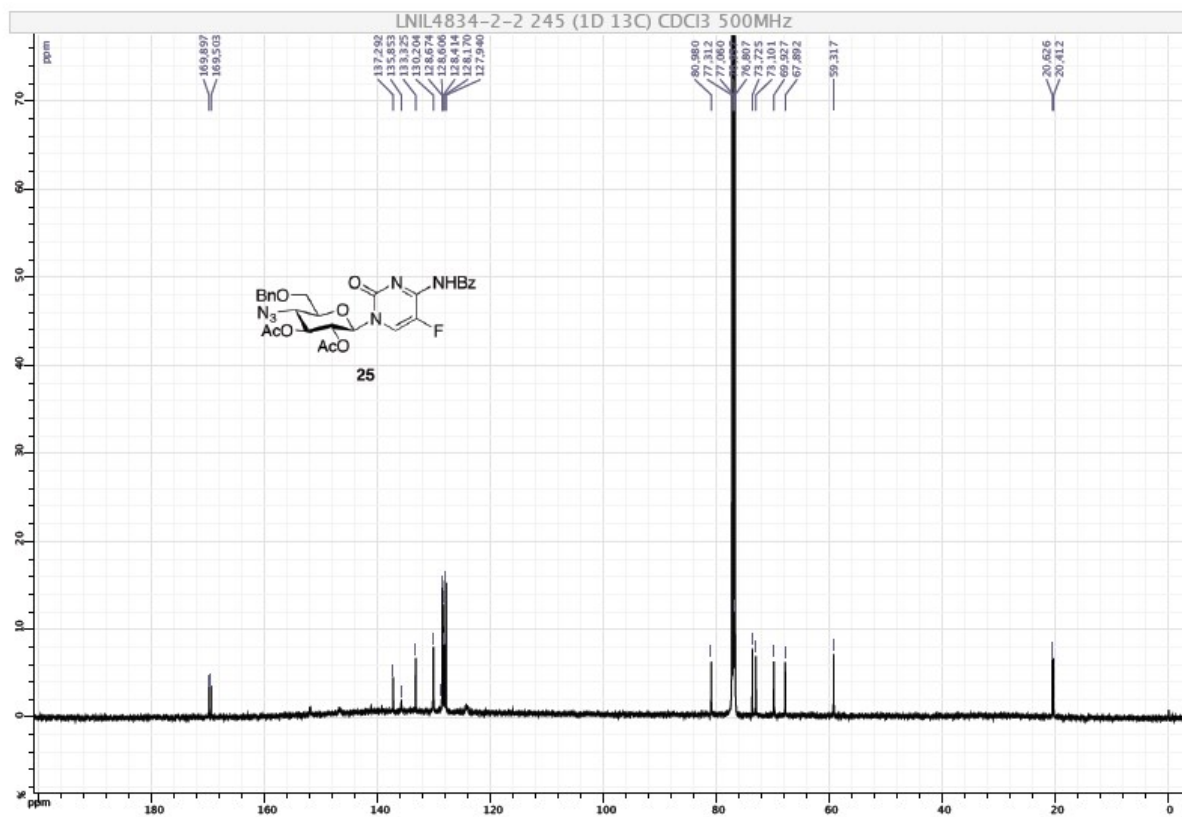

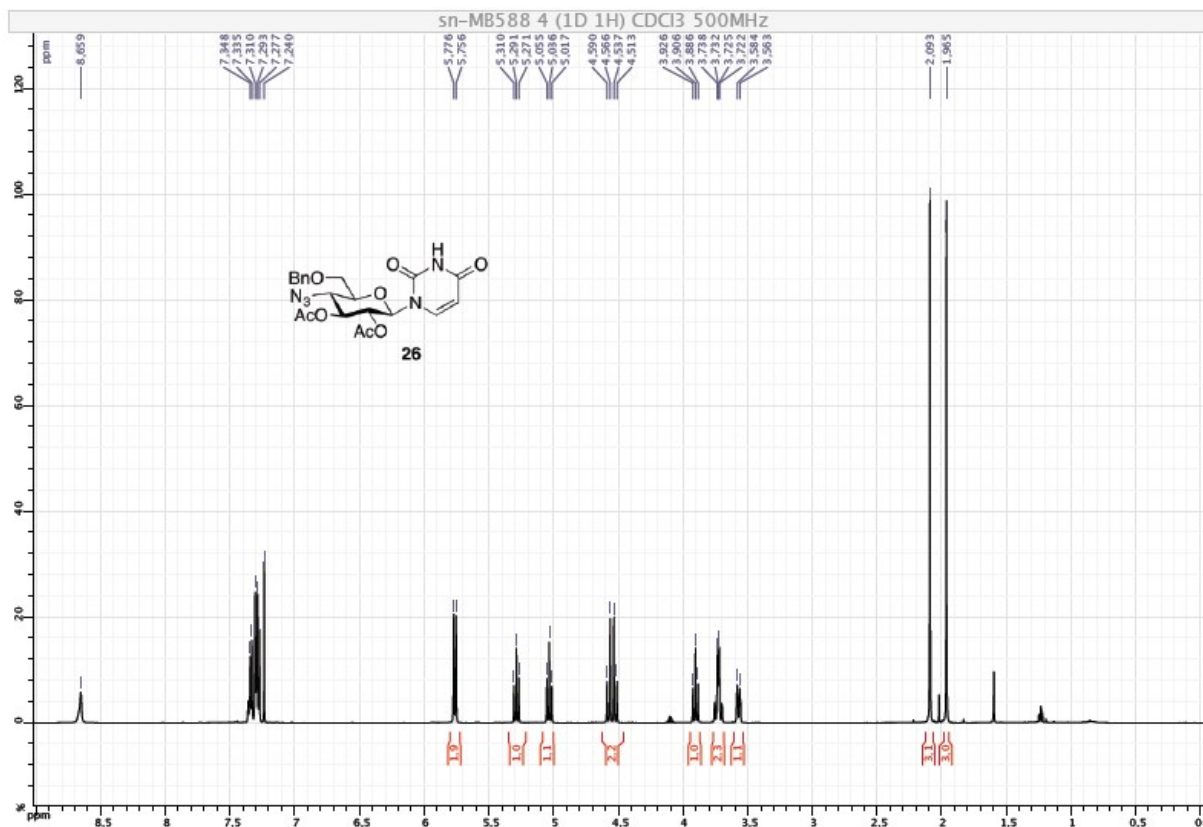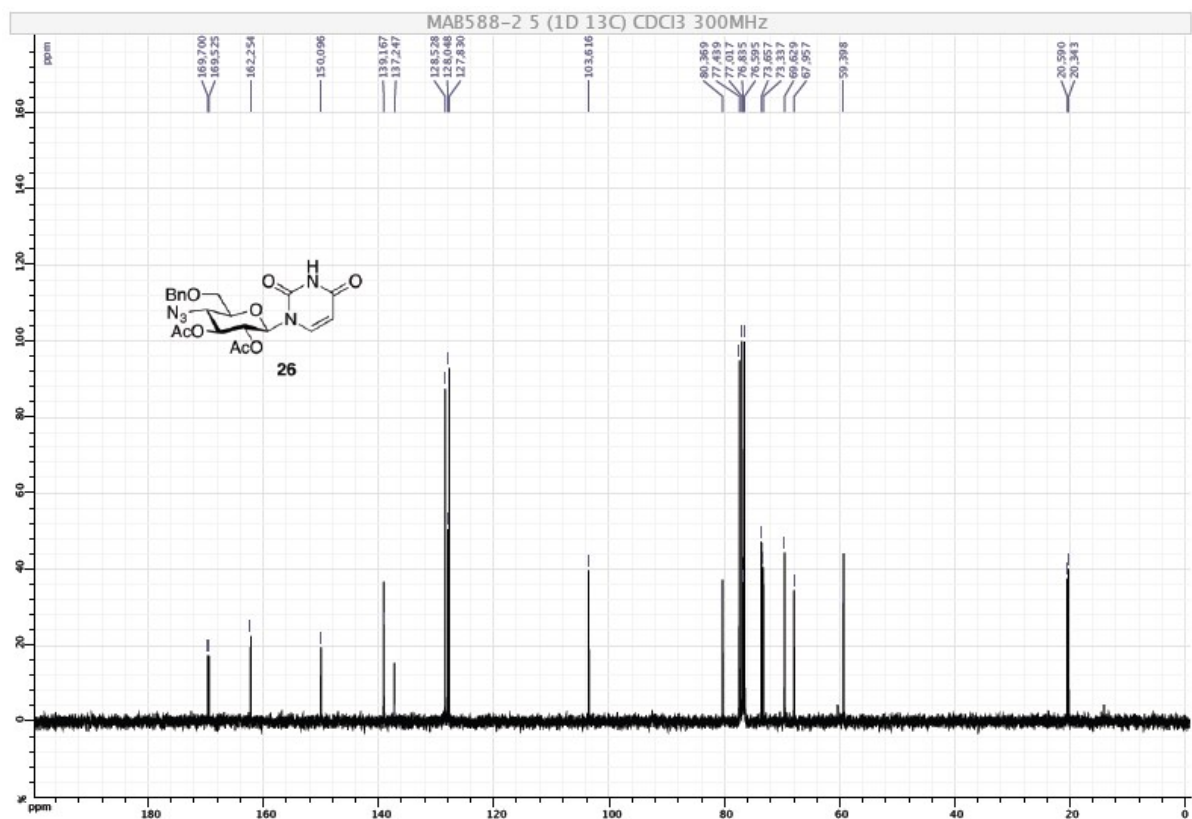

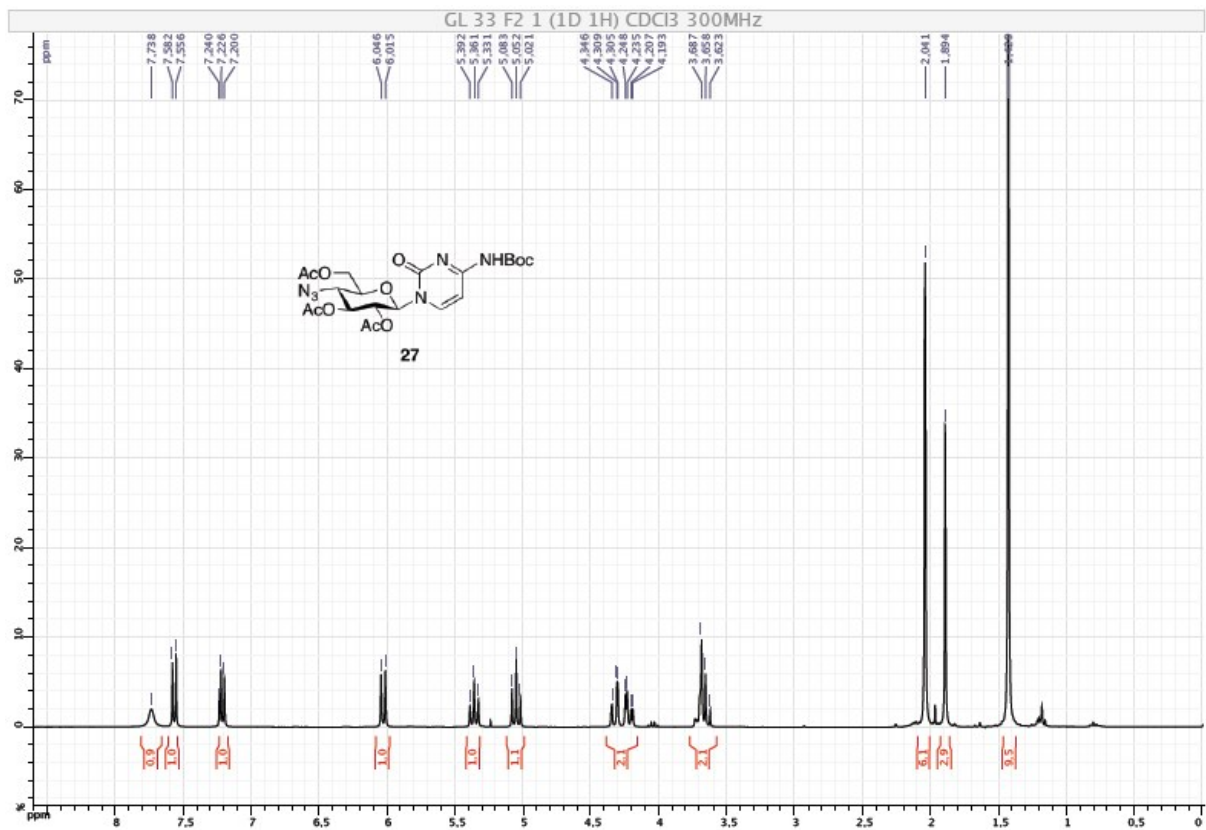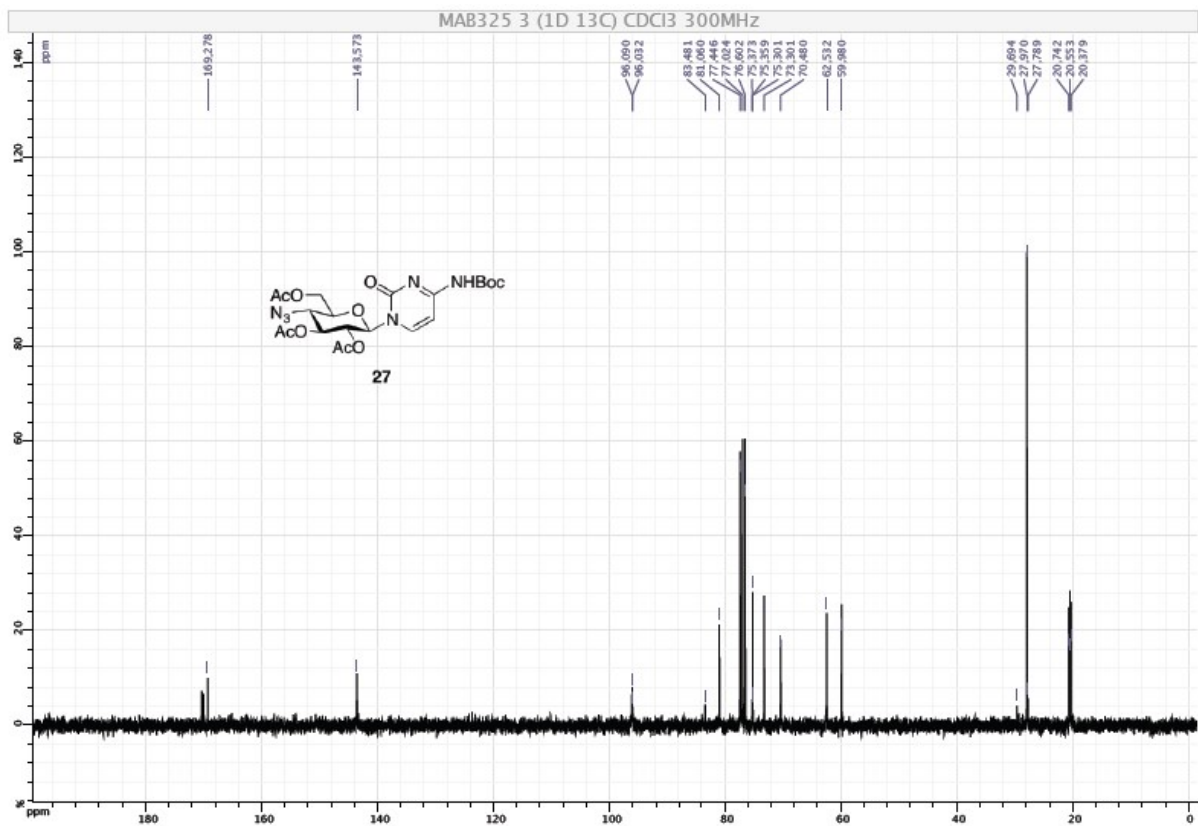



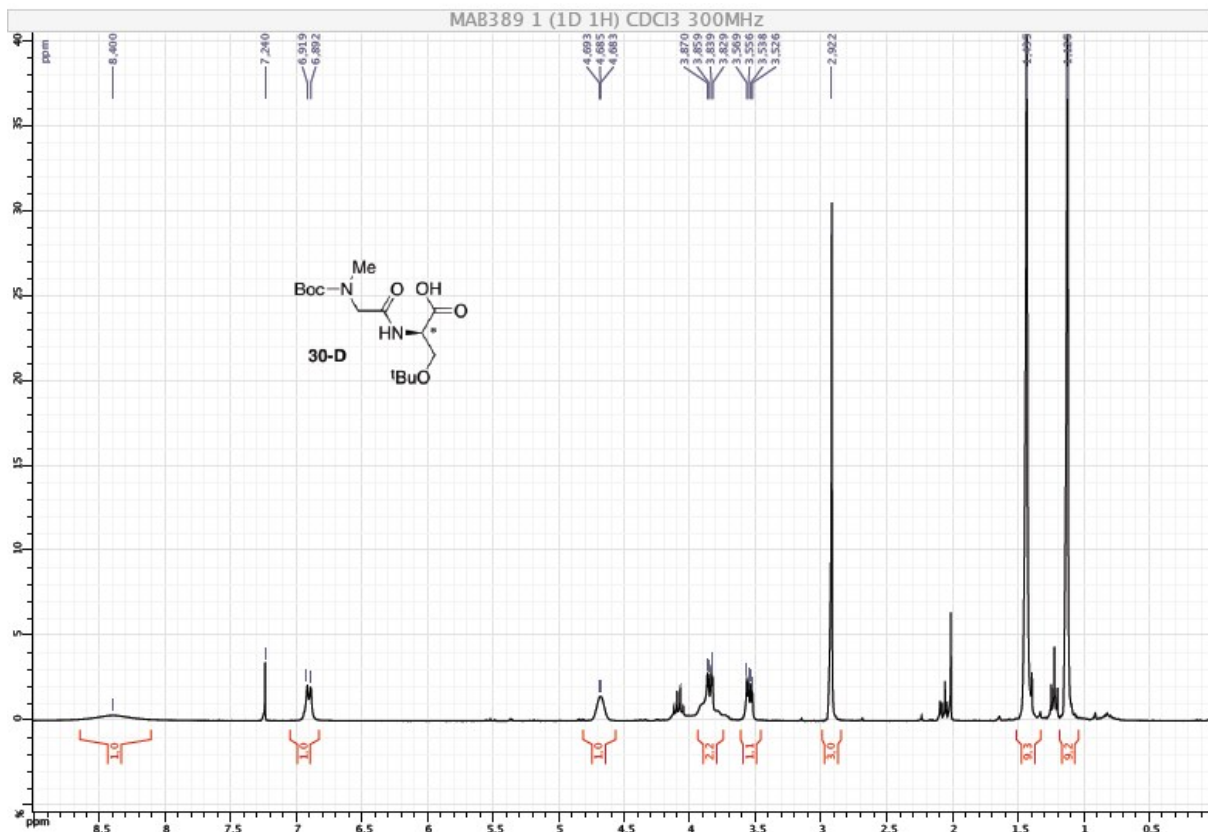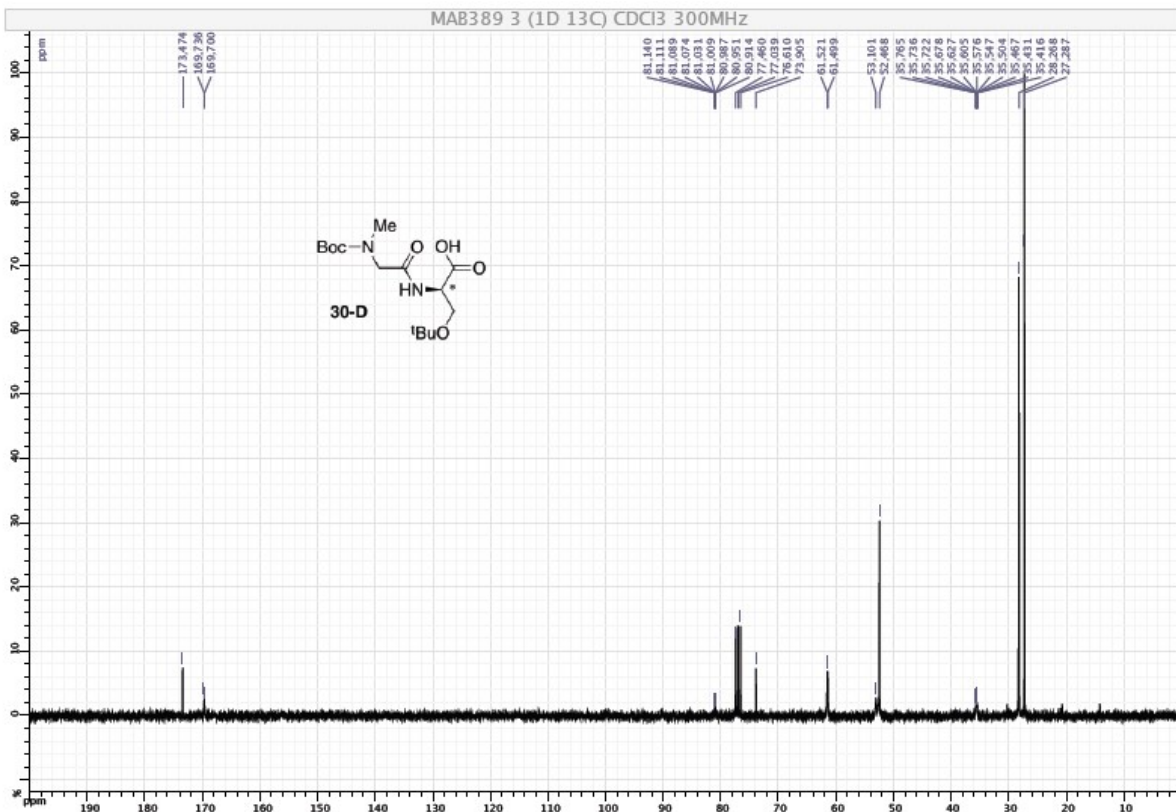

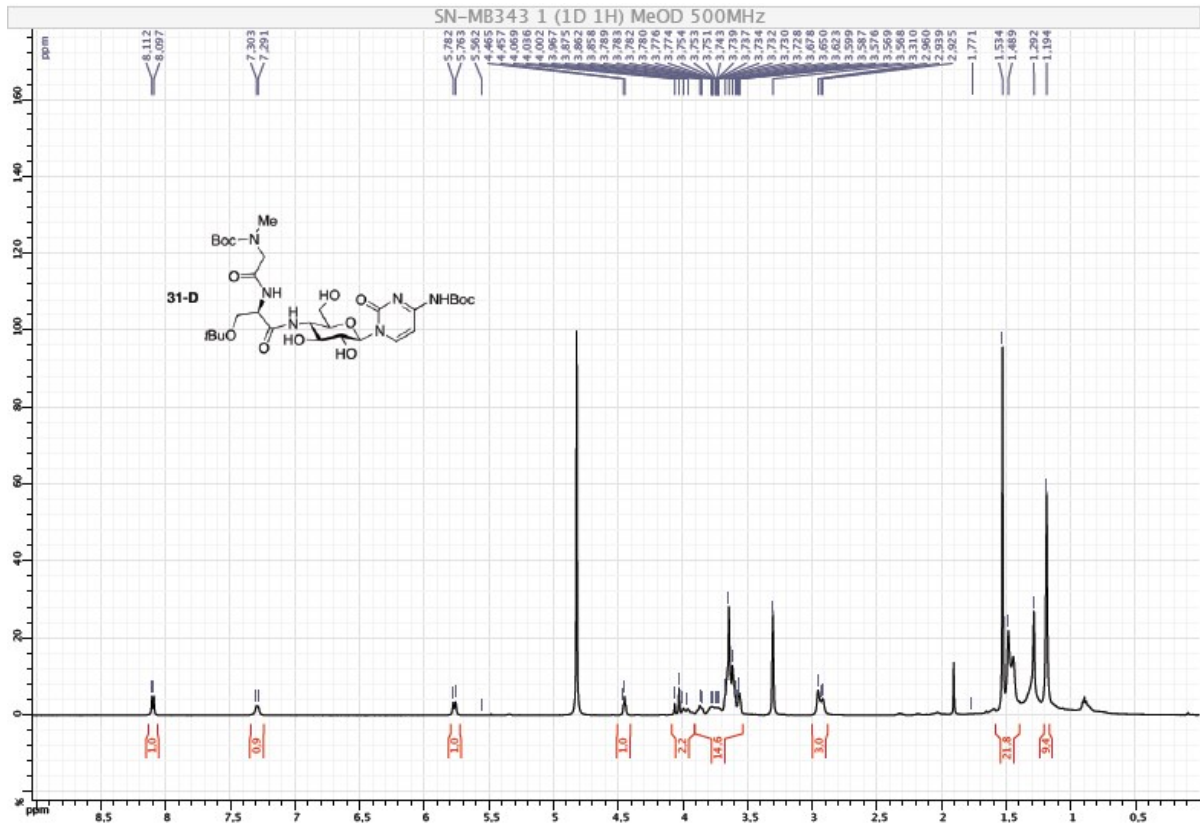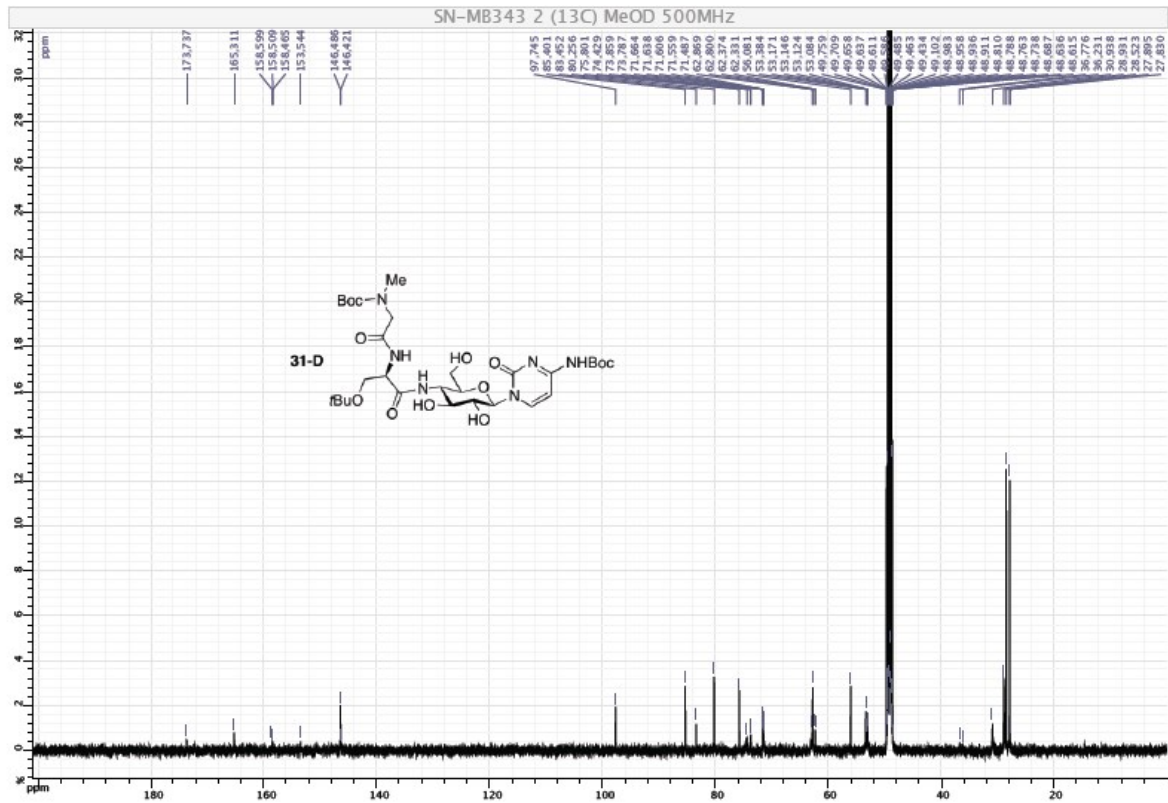

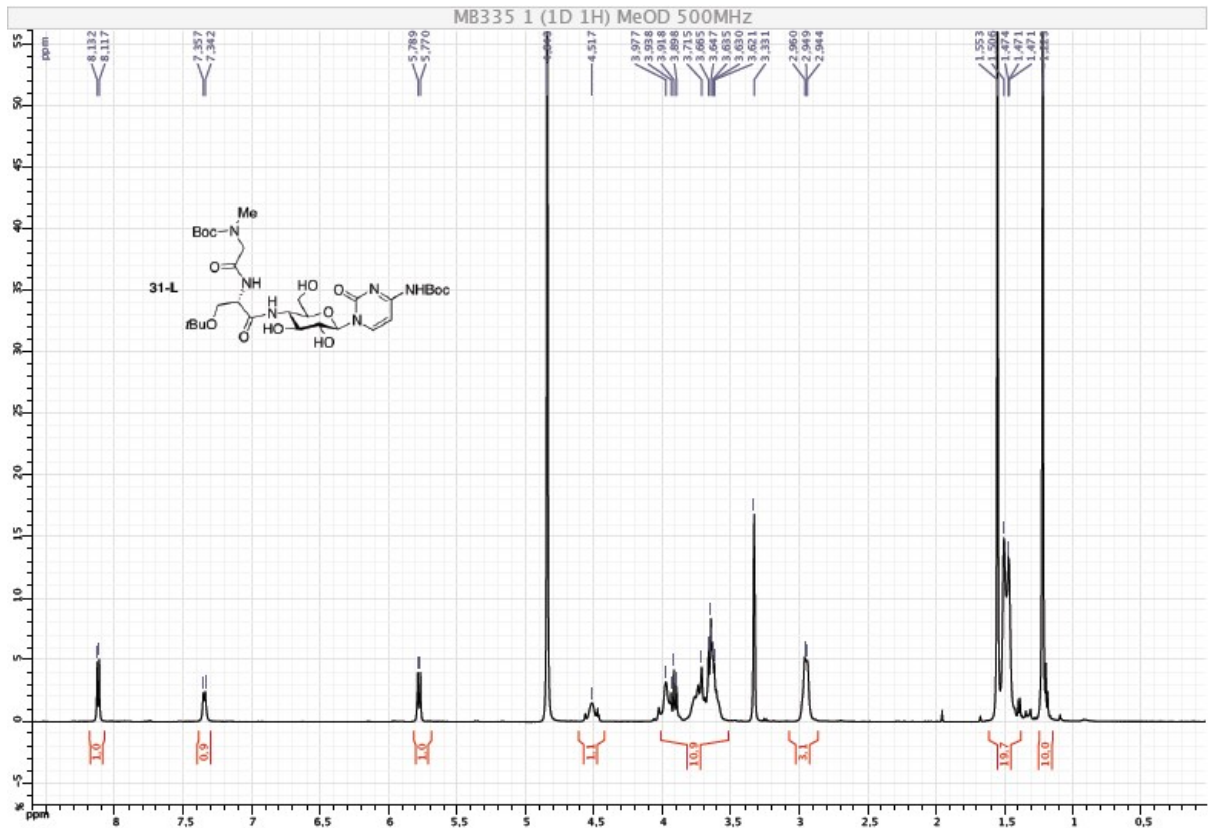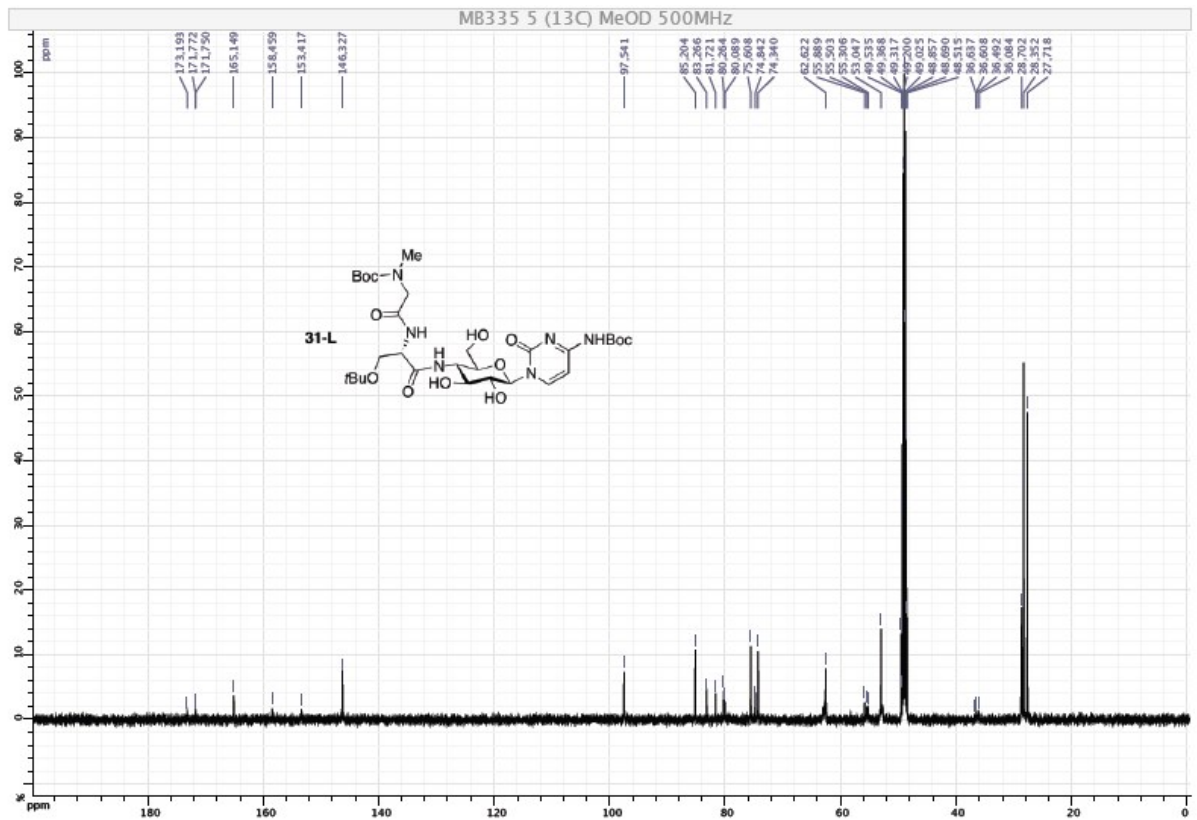

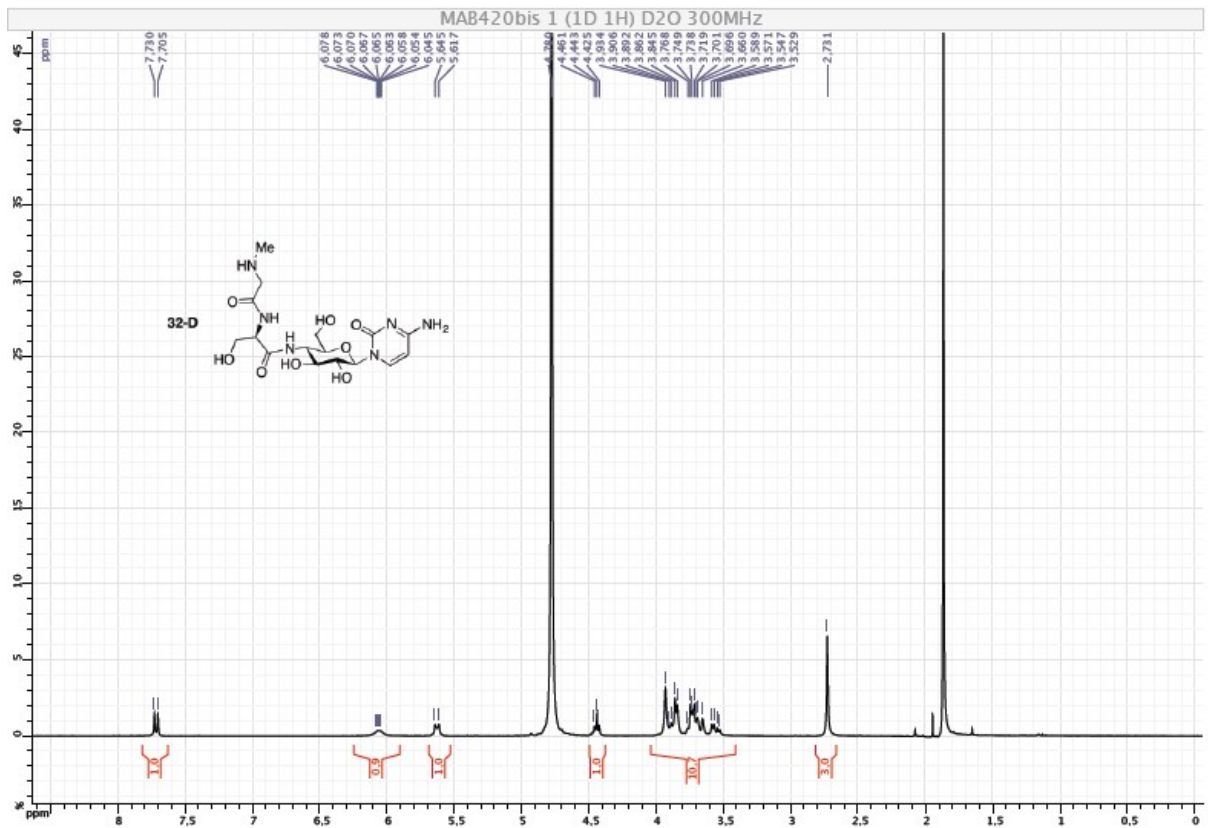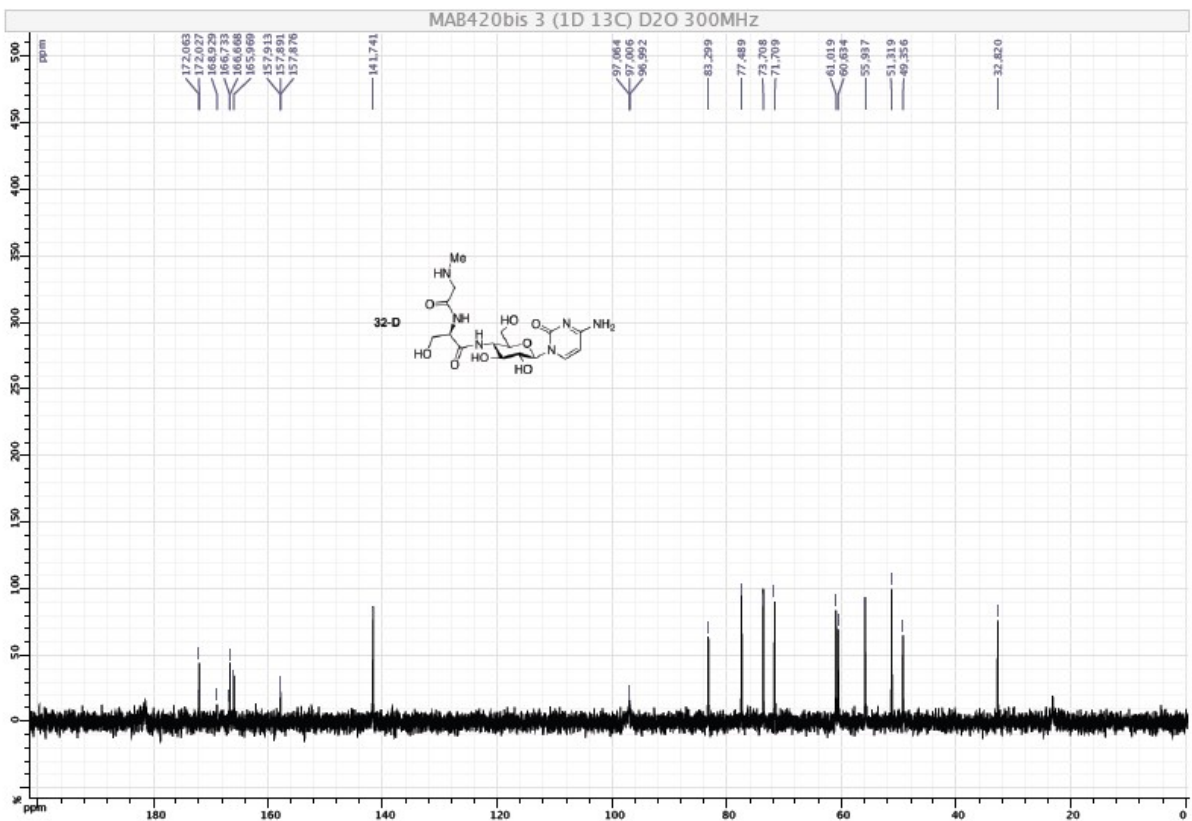



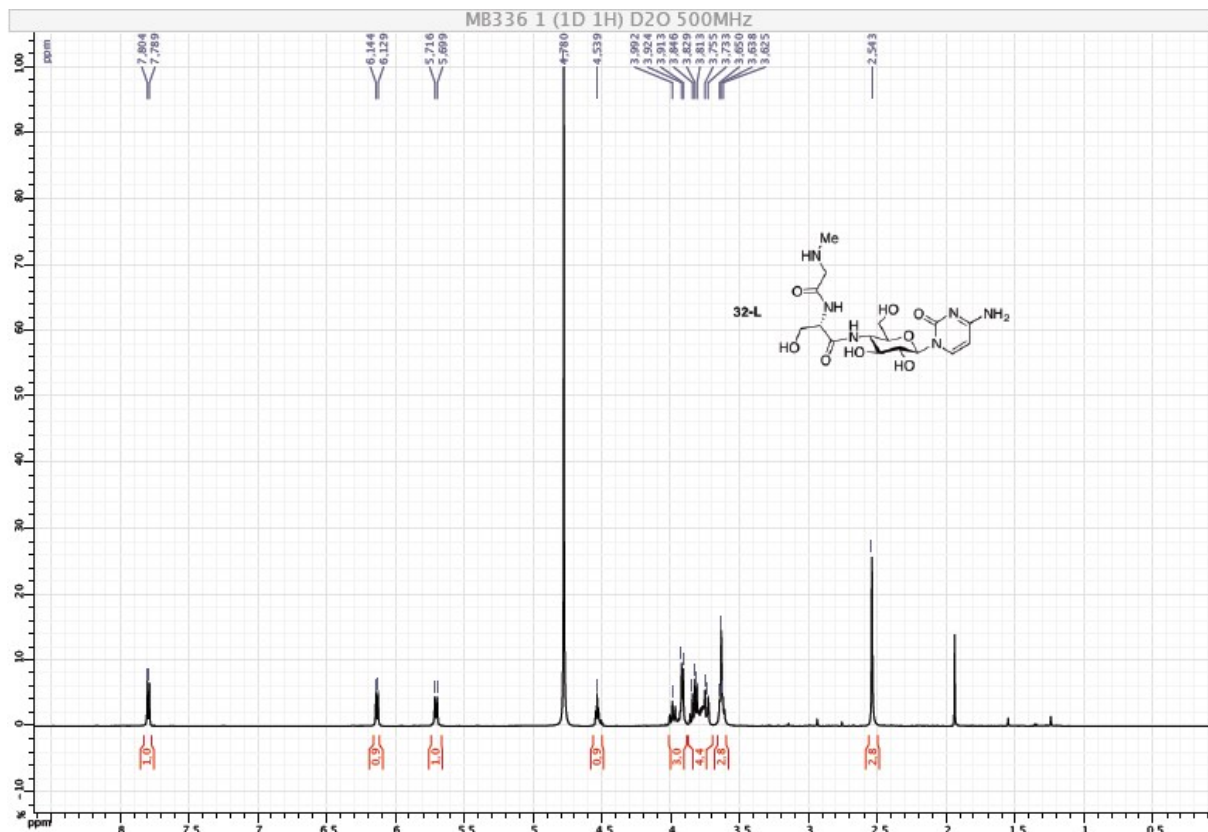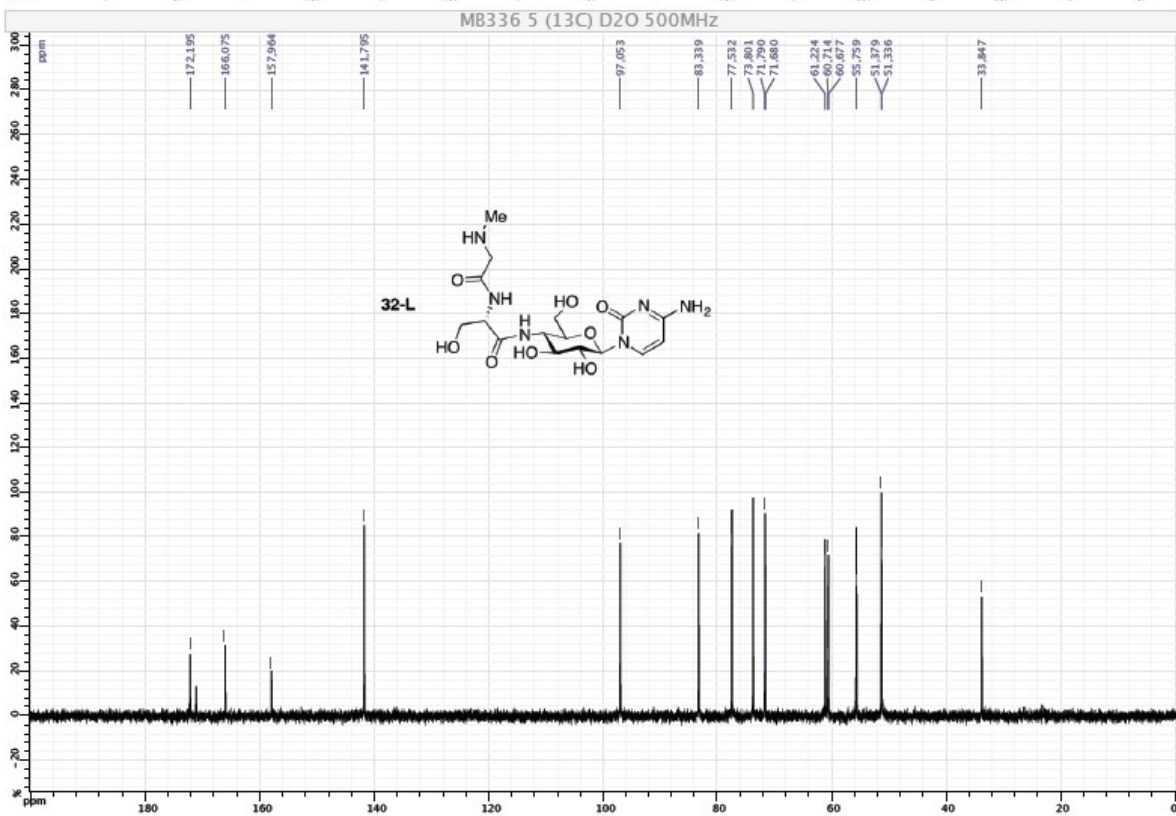



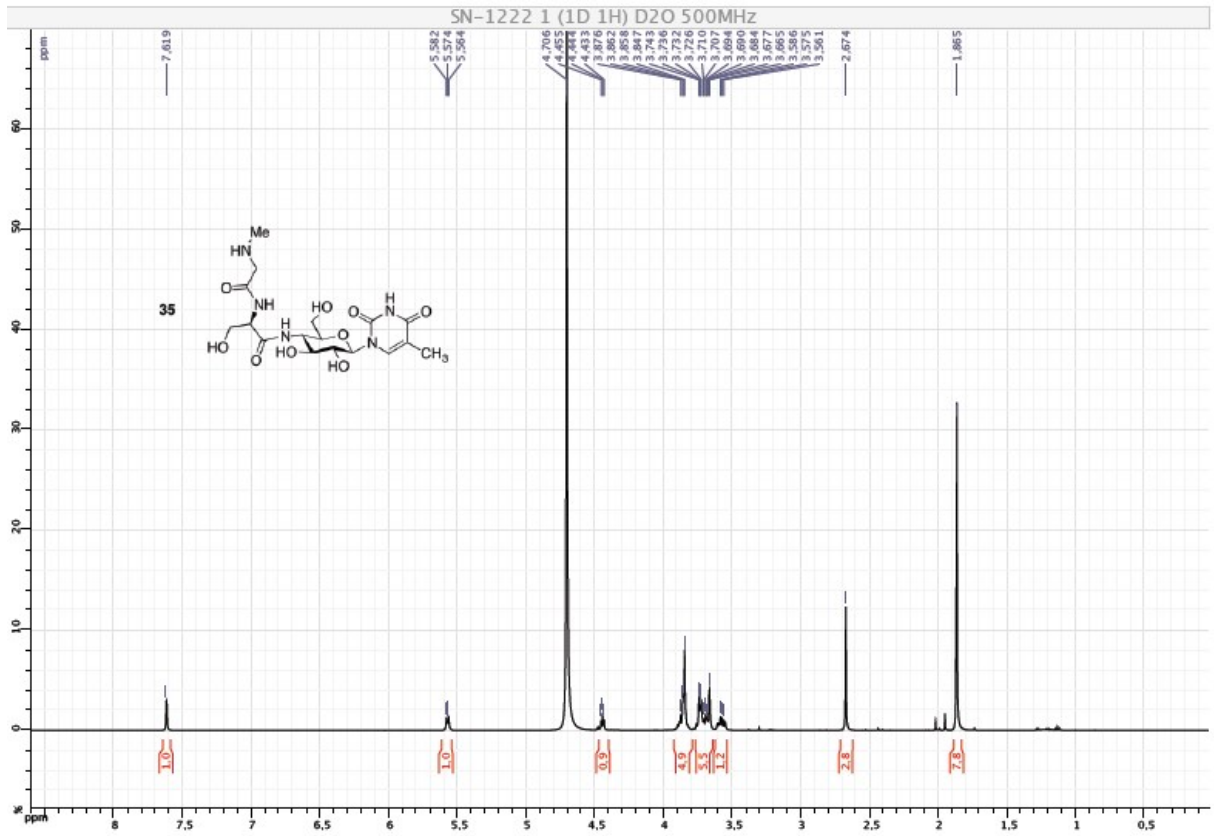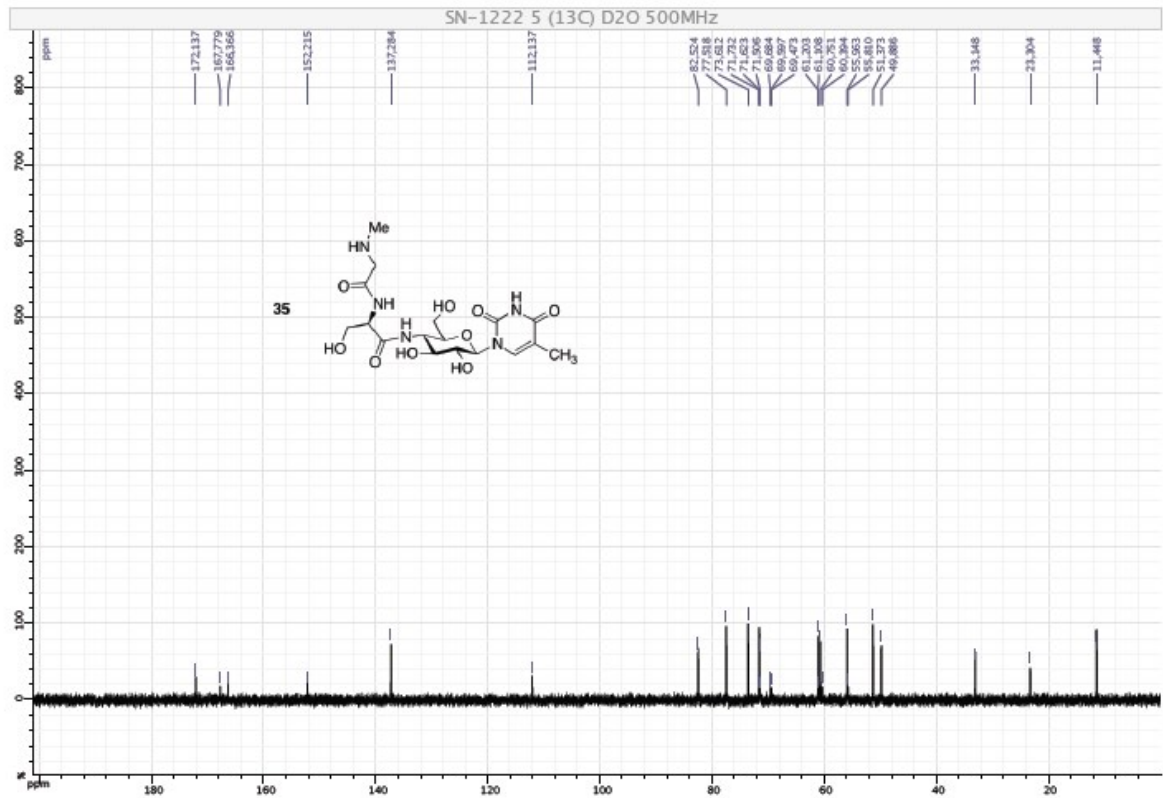

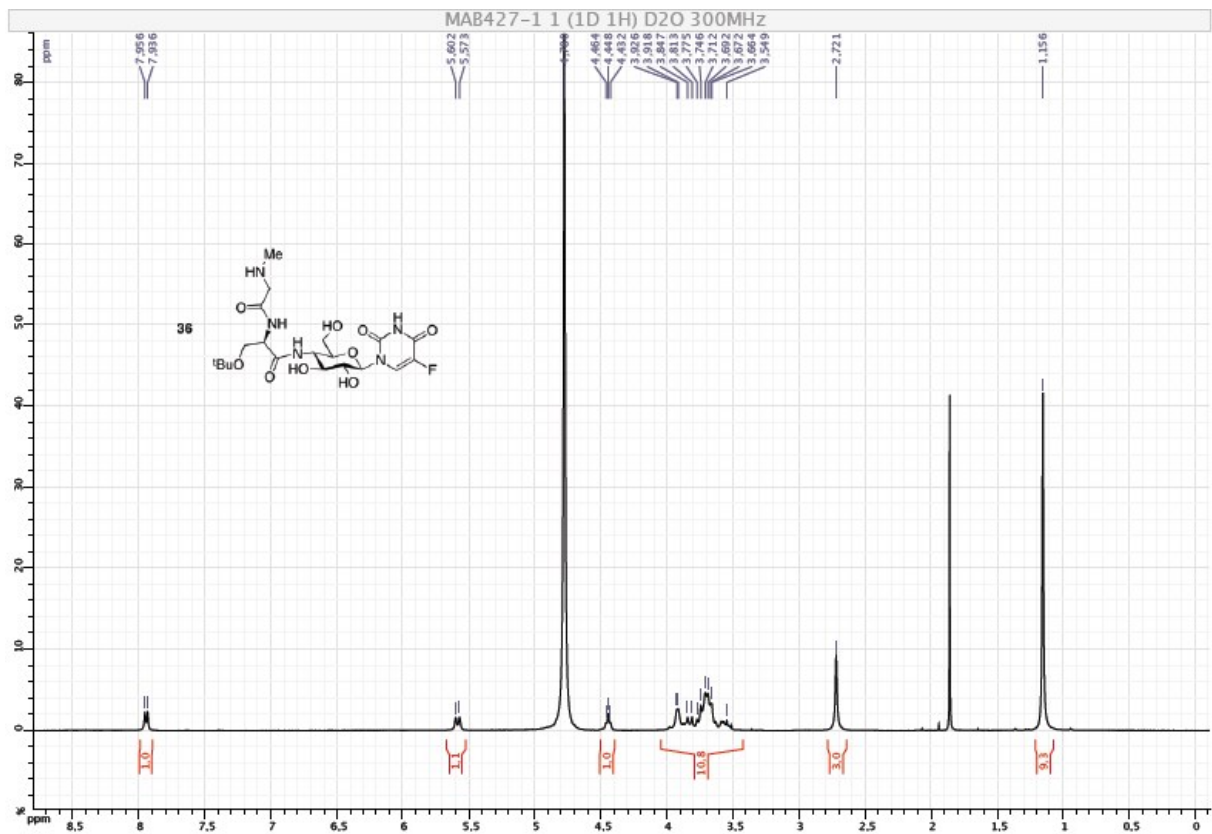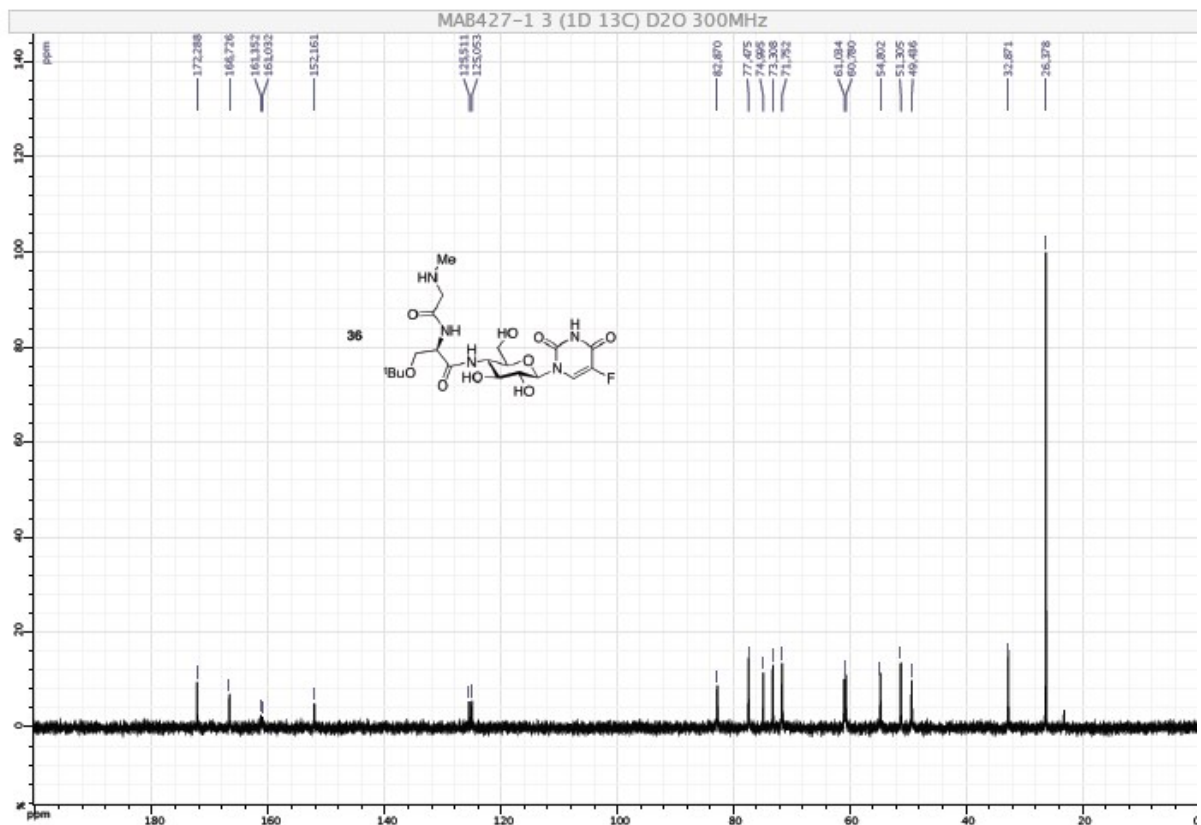

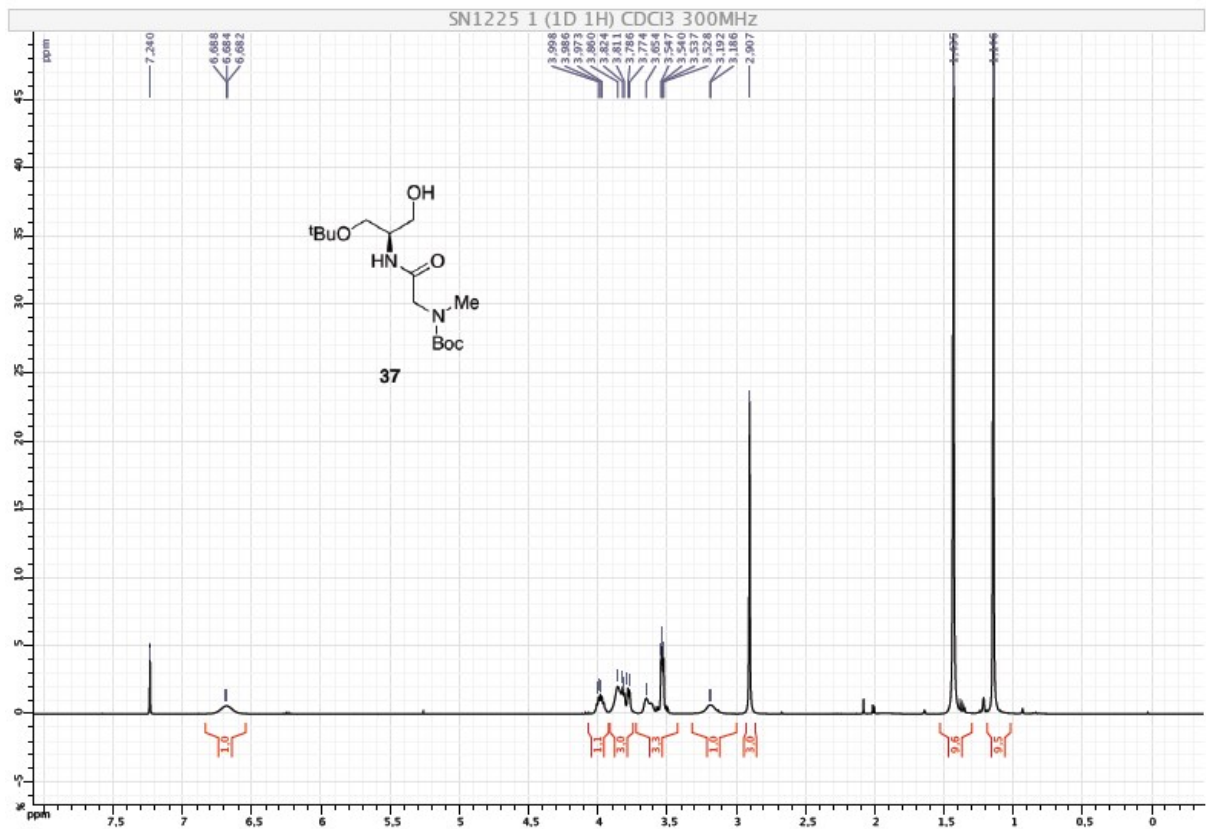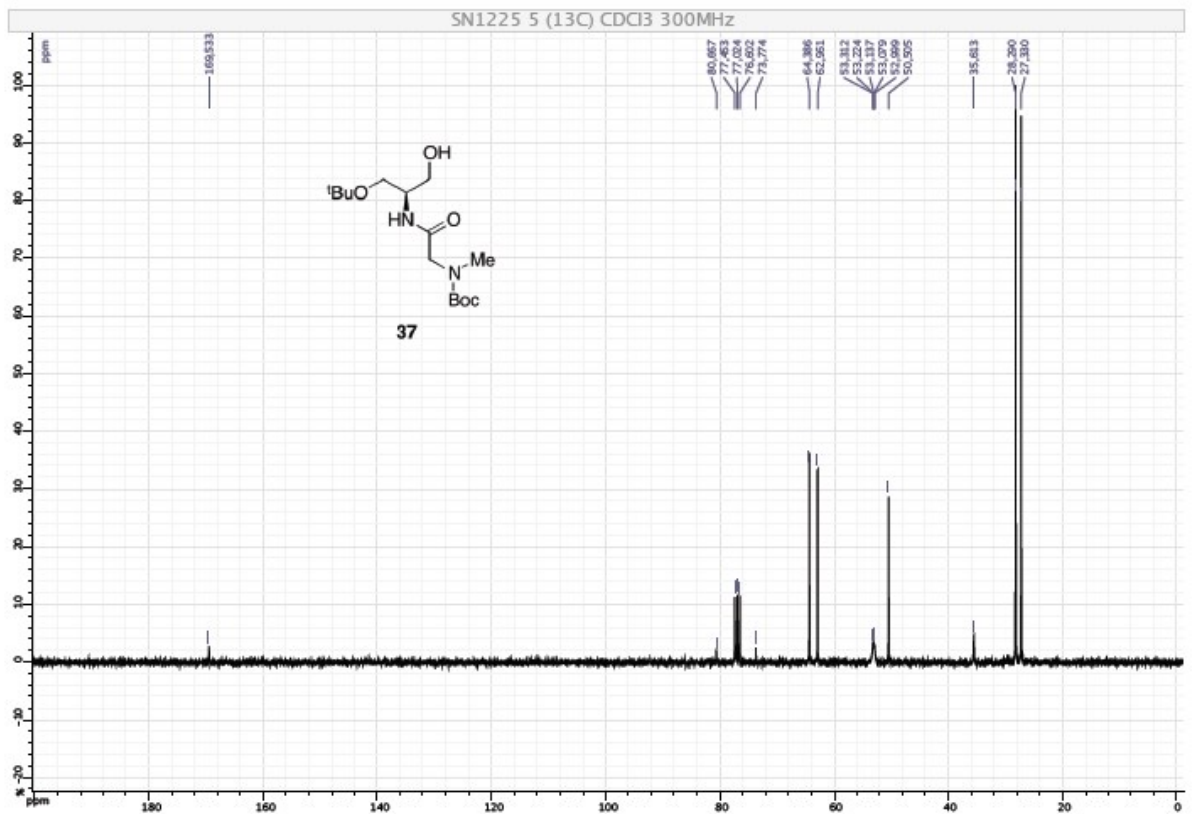

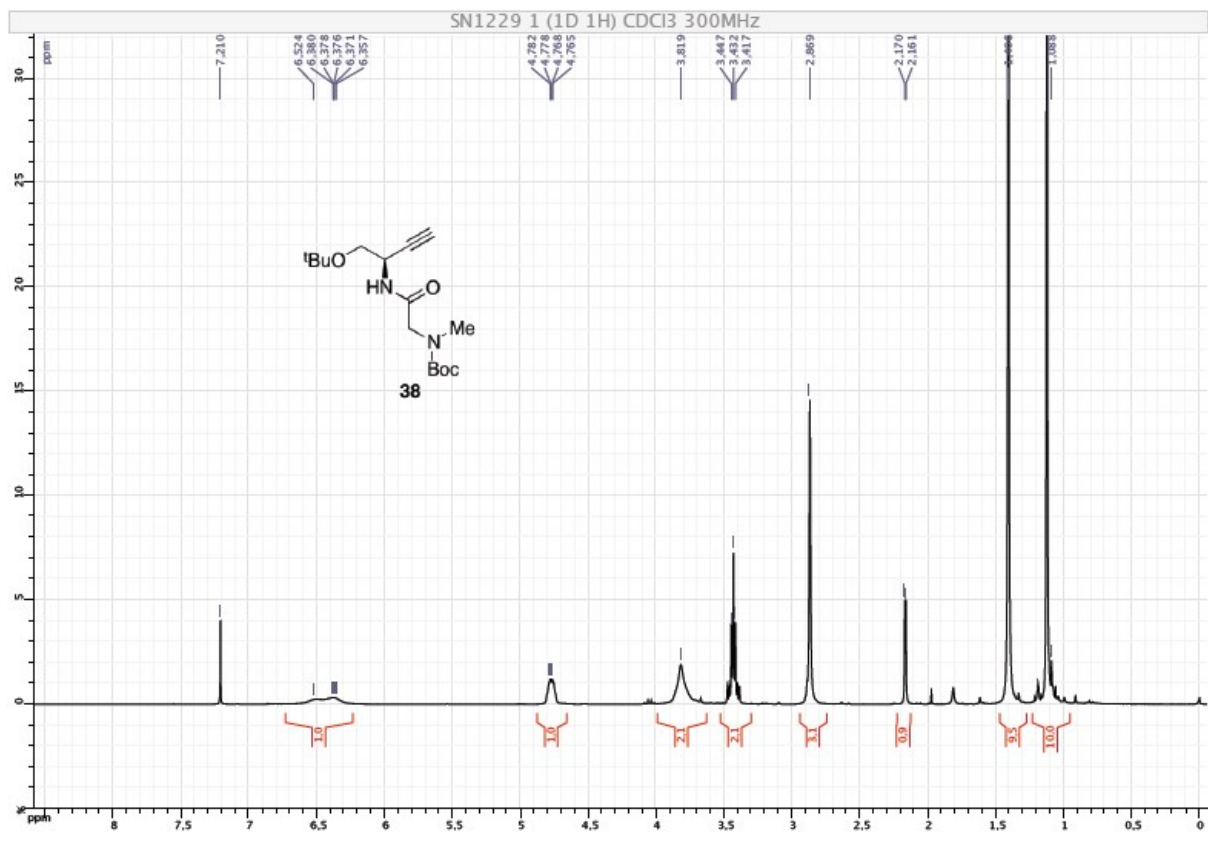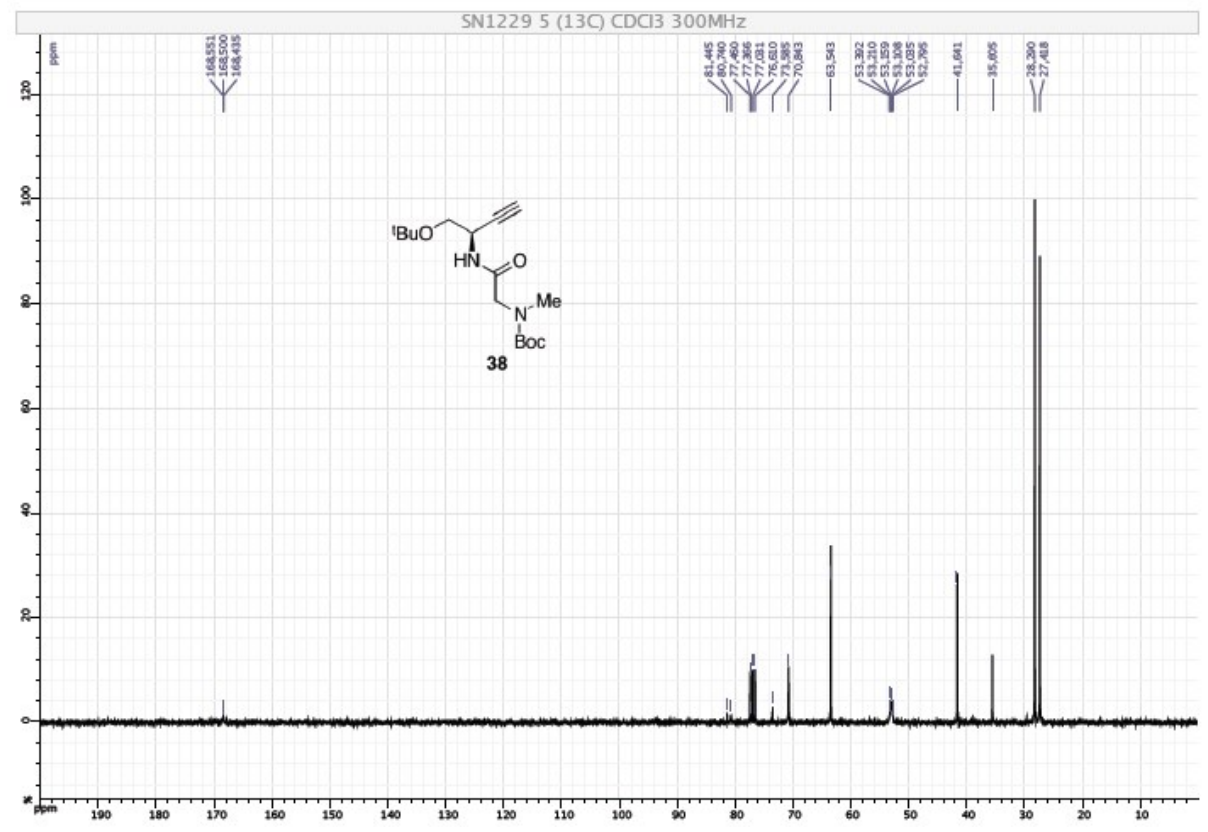

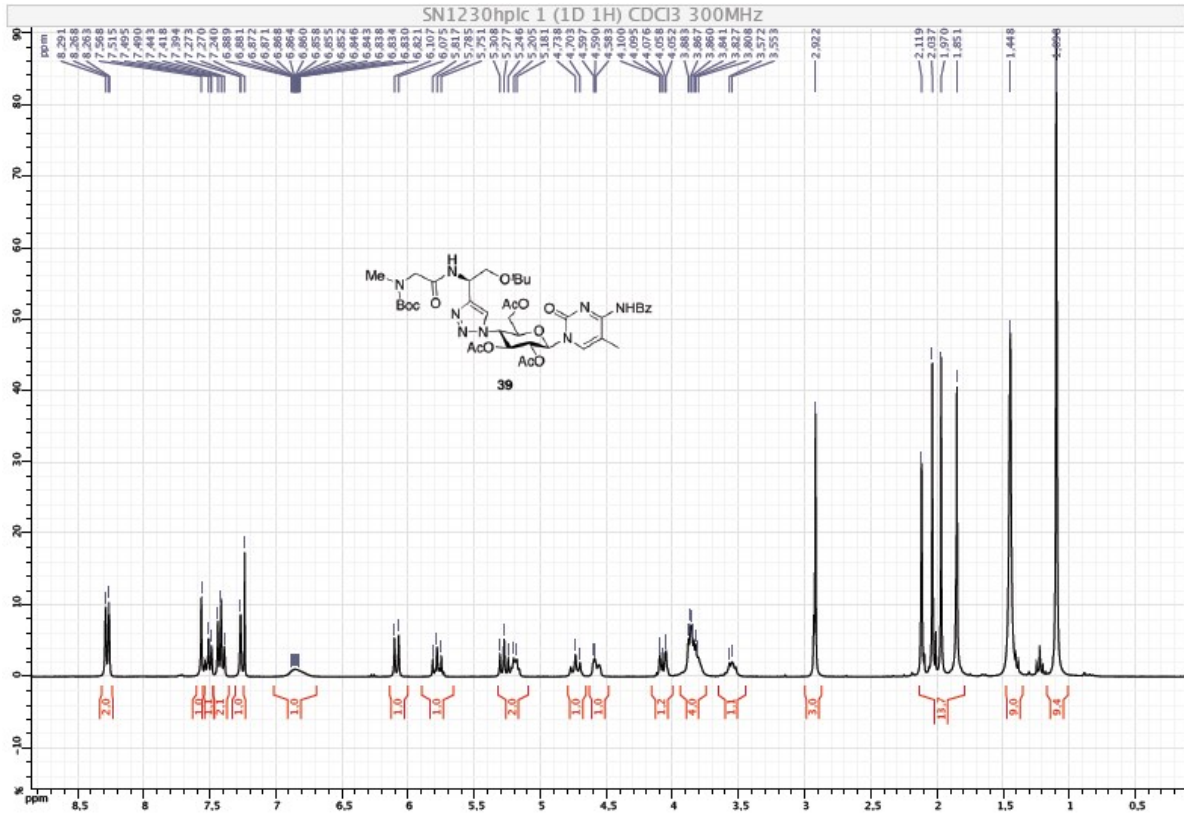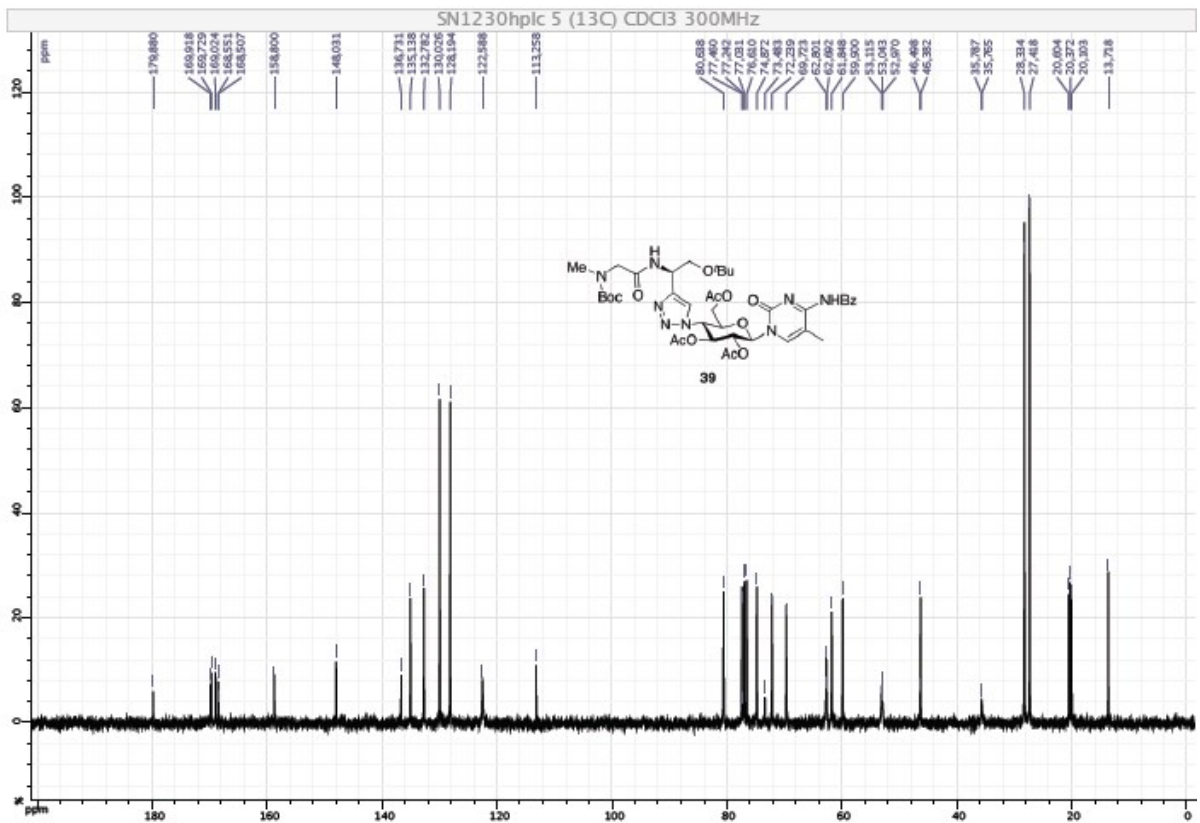

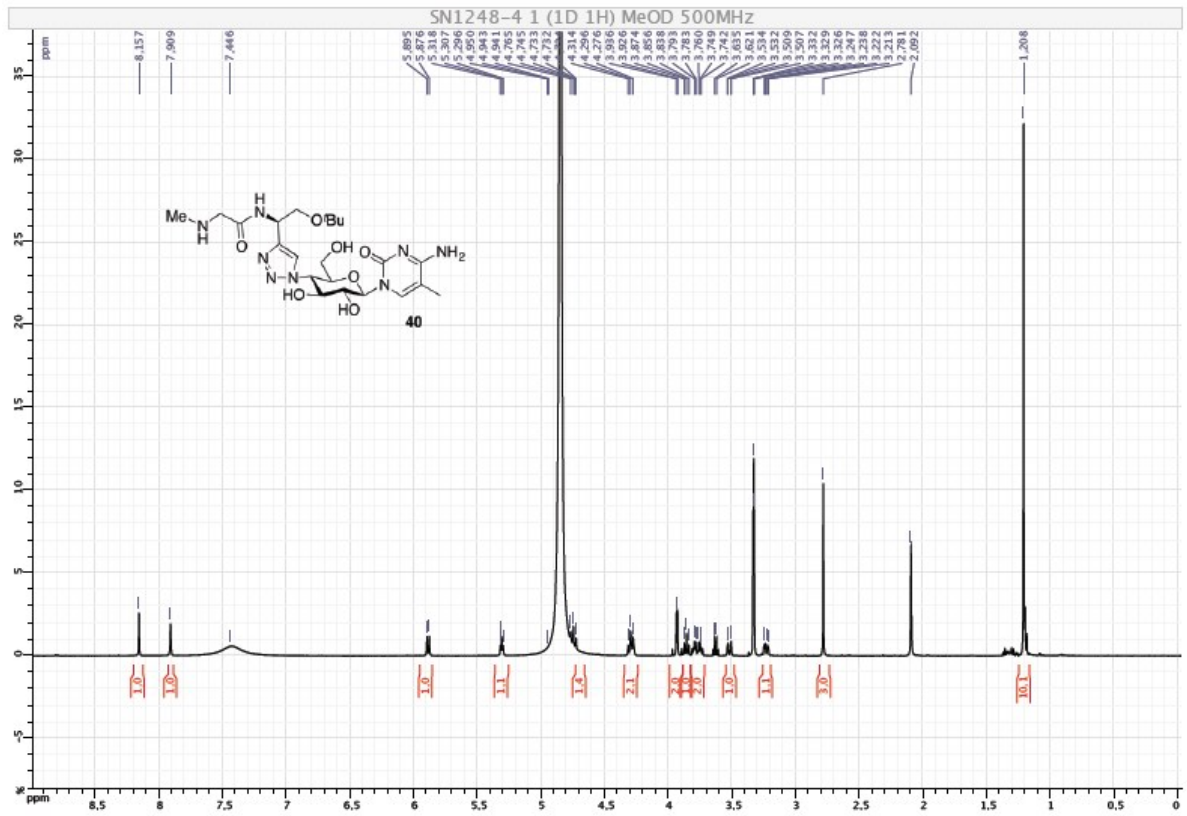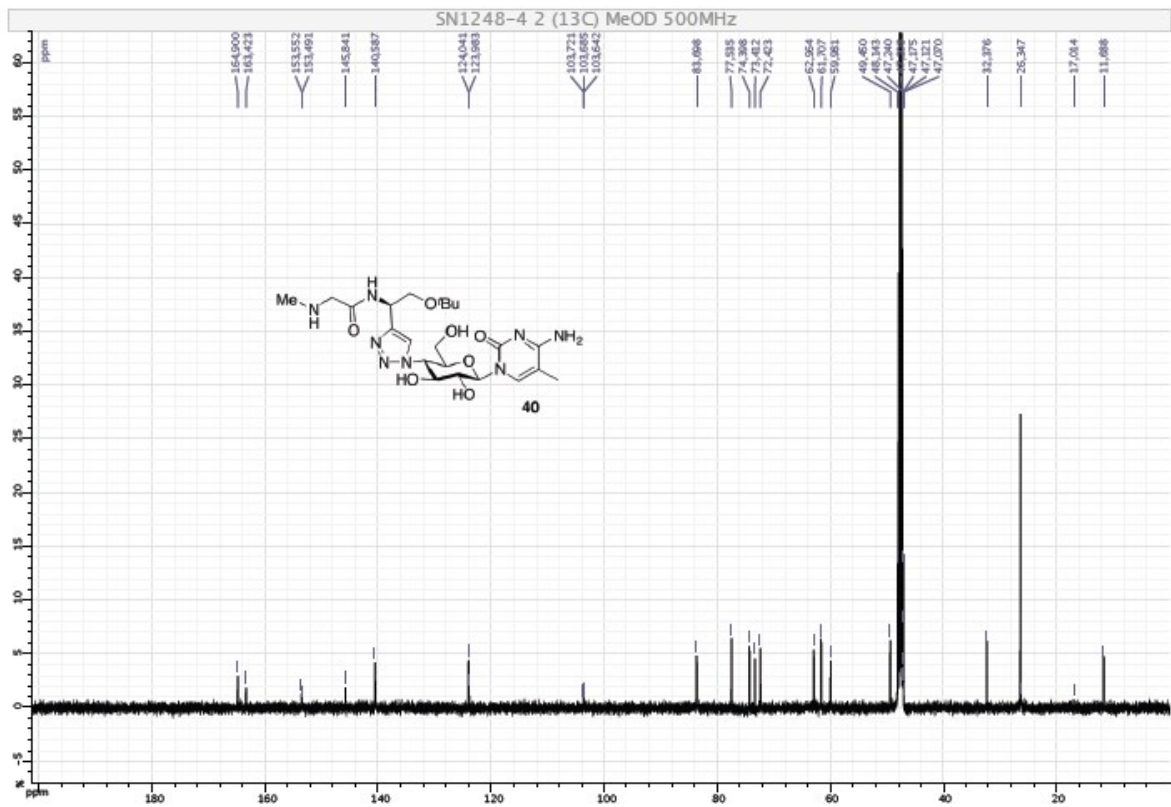

Supplement: d1ob00493j1.pdf [file d1ob00493j1.pdf]
